# 1 Nestmate recognition of early brood in ants

2

3 Arthur de Fouchier<sup>1,4</sup>, Chloé Leroy<sup>1</sup>, Abderrahman Khila<sup>2</sup>, Patrizia d’Ettorre<sup>1,3</sup>

4 <sup>1</sup> Laboratoire d’Ethologie Expérimentale et Comparée, Université Sorbonne Paris Nord, Villetaneuse,  
5 France

6 <sup>2</sup> Institut de Génomique Fonctionnelle de Lyon, Lyon, France

7 <sup>3</sup> Institut Universitaire de France (IUF), Paris, France

8 <sup>4</sup> Present adress: Institut d’Ecologie et des Science de l’Environnement de Paris, INRAE, Sorbonne  
9 Université, CNRS, IRD, UPEC, Université Paris Diderot, Paris, Versailles, France

10

## 11 [Keywords:](#)

12 Ants, Brood retrieval , Cuticular hydrocarbons, Nestmate recognition, Social parasitism

13

## 14 [Abstract](#)

15 Brood is critically important in social insect colonies. It carries the colony fitness through delivering  
16 future reproductive adults as well as workers that will increase the colony’s workforce. Adoption of  
17 non-nestmate brood can be a mean to increase colony’s workforce but entails the risk of rearing  
18 unrelated sexuals or social parasites. For early brood (eggs and L1 larvae), this balance is less positive  
19 as young brood need a substantial amount of resource before becoming workers. Thus, it appears  
20 beneficial for ant workers to discriminate between nestmate and alien brood using the chemical cues  
21 displayed at the brood’s surface. However, the chemical signature of ant early brood stages and its use  
22 by workers remains understudied. To fill this gap, we investigated the chemical basis of early brood  
23 nestmate and cross-species recognition in six Formicoid ants. We also tested the discrimination  
24 behaviour of workers in brood retrieval trials. We observed clear species-level cues and discrimination  
25 against heterospecific brood. We also found that eggs and most young larvae display a colony signature  
26 but that only some species discriminate against non-nestmate eggs and L1 larvae. Interestingly, these  
27 species appear to also be those belonging to genera subject to brood parasitism.

## 28 Introduction

29 In ants, workers are fully or partially sterile [1,2]. Workers achieve fitness indirectly by rearing their  
30 mother's brood to provide workforce and future reproductive individuals (males and queens). This  
31 reproductive division of labour is a hallmark of highly social societies and place brood at the centre of  
32 ant colonies. Workers promptly retrieve eggs and larvae found outside the nest [3], and secure them  
33 in case of colony disturbance [4]. Behavioural studies have shown that ant workers adopt brood from  
34 other nests, and even other species, while keeping a preference for nestmate eggs and larvae [5].

35 Brood adoption is an adaptive behaviour as larvae raised in a foreign and unrelated nest may  
36 eventually integrate the colony workforce [6,7]. Incipient colonies of *Lasius niger* and *Messor*  
37 *pergandei* often raid brood from close-by colonies to increase their chance of survival [8]. Brood theft  
38 can also take place during nests relocation [9]. However, adopting non-nestmate brood entails a risk.  
39 Some ant species are subject to social parasites, such asinquilines and slave-makers, which take  
40 advantage of the host workers to raise their own brood and have a clear negative impact on the fitness  
41 of their host colony. [10,11].

42 In theory, adopting non-nestmate brood involves a trade-off, for ant workers, between the gain of  
43 future workforce and the potential cost of raising unrelated reproductive individuals or accepting a  
44 social parasite [7]. It seems thus adaptive to develop counter-measures to avoid such risks. Among the  
45 possible adaptations, there is the ability of workers to recognize intruding non-nestmate adults and  
46 brood [12], as occurs in populations subjects to brood parasitism [13]. However, adaptations at the  
47 species level are not well understood [10,11].

48 Ants are usually efficient in recognising non-nestmates and behave aggressively toward competitors  
49 for the resources of the environment [14]. Nestmate recognition relies on the detection of colony-  
50 specific chemosensory cues. These are long chain hydrocarbons found on the outer surface of  
51 developing and adult individuals. The hydrocarbons can be linear, saturated or unsaturated, or contain  
52 methyl groups (methyl-branched alkanes) [15,16]. The blend of hydrocarbons displayed by each  
53 individual is the results of both genetic [16] and environmental factors [17]. Consequently, members  
54 of the same colony, which are often related and live in the same environment, share similar  
55 hydrocarbon profiles. Cuticular hydrocarbons homogenize between members of the colony through  
56 mutual grooming, food sharing, inter-individual contacts or contact with the nest-material [16,18].

57 The importance of brood nestmate recognition for ant colonies led to 40 studies in 33 ant species (as  
58 reviewed in [5]). However, those studies focused mostly on mid to late-stage larvae, while early brood  
59 stages remain understudied. Hydrocarbons displayed on ant eggs have been studied in few genera  
60 [19–25]. To our knowledge, a colony-level signature of the surface hydrocarbons of the eggs has been  
61 convincingly found in two genera, belonging to the Ponerinae and the Formicinae [21,25].

62 Eggs can acquire the hydrocarbon signature through various mechanisms. The source of colony-level  
63 cues on brood is a question better studied in eggs than larvae. Freshly deposited eggs already bear the  
64 colony signature [25]. Mothers appear to deposit hydrocarbons on eggs while they are maturing in  
65 their ovaries [20,26]. Once laid, eggs surface hydrocarbons could be influenced by contact with  
66 workers and allo-grooming [16,27]. However, the effect of contact alone is probably not a rapid  
67 process [28]. It is possible that embryos produce hydrocarbons that might traverse the chorion through  
68 pores and modify the egg surface hydrocarbons [29].

69 Surface hydrocarbons and nestmate recognition of early stage larvae remains critically understudied.  
70 When larvae hatch from their egg, it is unclear if the surface hydrocarbons are transferred to the larvae  
71 or if freshly hatched larvae shall *de novo* synthesize surface hydrocarbons [30]. In *Aphaenogaster*

72 *senilis*, the quantity of surface hydrocarbons on larvae is smaller compared to eggs and workers [31].  
73 Most of the hydrocarbons on the surface of eggs are likely not transferred to the larvae. As such,  
74 whether first instar larvae display enough cues to be recognised as nestmate remains an open question.

75 In this study, we aimed at filling the gap in our knowledge of nestmate recognition of early brood  
76 stages in ants. We investigated the colony-level signature of surface hydrocarbons of eggs and first  
77 instar (L1) larvae from six species belonging to three different subfamilies of the Formicoid clade [32]:  
78 Myrmicinae, Formicinae and Dolichoderinae. To assess how selective workers are when adopting  
79 brood, we studied brood retrieval behaviour of workers facing eggs and L1 larvae originating from their  
80 colony (nestmate), from another homospecific colony (non-nestmate) or from another species  
81 (heterospecific).

## 82 Material and Methods

83 For complete details on the materials and methods, see [Supplementary Material and Methods](#).

### 84 Ant colonies

85 We used colonies of six ant species: *Aphaenogaster senilis* (Formicidae, Myrmicinae), *Camponotus*  
86 *aethiops* (Formicidae, Formicinae), *Formica fusca* (Formicidae, Formicinae), *Lasius niger* (Formicidae,  
87 Formicinae), *Messor barbarus* (Formicidae, Myrmicinae) and *Tapinoma darioi* (Formicidae,  
88 Dolichoderinae) housed in the laboratory.

### 89 Chemical analyses

90 We collected at least three eggs and first instar larvae from at least three different colonies for each  
91 of the six species. Surface hydrocarbons were extracted from eggs and larvae using 10µl of n-pentane  
92 (≥99%, HPLC grade, Sigma-Aldrich) for 2 minutes. We then injected 3 µL of the extract into an Agilent  
93 7890A gas chromatograph (GC) coupled to an Agilent 5975C mass spectrometer (MS).

### 94 Behavioural experiments

95 The aim was to test the behaviour of workers when facing nestmate, homo-specific non-nestmate or  
96 hetero-specific eggs or first instar larvae. The same protocol was followed for eggs and L1 larvae trials,  
97 which were performed independently. Brood and workers originated from twelve *A. senilis* colonies,  
98 ten *C. aethiops*, *Lasius niger* and *M. barbarus* colonies and six *T. darioi* colonies. Six *F. fusca* colonies  
99 were used as source of hetero-specific brood. We prepared groups of six nestmate workers (three  
100 from outside the nest and three from inside the nest) in an eight cm arena with a filter paper as floor  
101 and with walls coated with Fluon® (AGC Chemicals Europe, Thornton-Cleveleys, United Kingdom). Each  
102 group was given a refuge made of a red-coated 1.5mL Eppendorf tube (that had spent at least twenty-  
103 four hours in the box of the original colony), three late-instar larvae from their own colony, food  
104 (mixture of honey and apple) and water. After twenty-six hours of acclimation, if the workers had  
105 brought the late-instar larvae into the refuge, we removed food and water and started the behavioural  
106 trials.

107 Shortly before the trials, we collected eggs or L1 larvae from the colony of origin of each groups of  
108 workers (nestmate), from another colony of the same species (non-nestmate) or from another species  
109 (hetero-specific). For heterospecific brood, we used brood from species of the same subfamily and of  
110 similar size when available. For *A. senilis*, we used *M. barbarus* brood and *vice versa*. For *C. aethiops*  
111 and *L. niger*, we used *F. fusca* brood. For *T. darioi*, we used *L. niger* brood. For each trial, three brood  
112 items were deposited in a line ([Supplementary Figure S1](#)). All three of these were either nestmate, or  
113 non-nestmate or heterospecific relative to the workers. The behaviour of the workers towards the  
114 brood items was video recorded with an FDR-AX33 Sony camera for fifteen minutes. After fifteen  
115 additional minutes, any brood that had not been brought inside the refuge were removed from the  
116 arena. Thirty minutes later, another set of three brood items with a different origin were presented to  
117 the same group of workers. This was repeated three times. Therefore, each group of workers received  
118 nine brood items in total in 3 different trials of all the three possible origins. The order of presentation  
119 of the type of brood items was controlled to prevent any bias.

120 The behaviour of the workers was scored for the first 15 minutes after the first brood item was  
121 deposited using the software Boris v7.9.15 [33]. We noted the times where workers started and  
122 stopped to antennate a brood item and the times when a worker entered the refuge with a transported  
123 brood item. Trials for which the workers did not enter in contact with the brood items were discarded  
124 from further analysis as workers were considered inactive.

125

126 *Data and statistical analyses*

127 Data was analysed using R Studio (v1.3.1093 , RStudio Team, 2015) and R software (v4.0.0, R Core  
128 Team, 2020).

129 *Chemical data*

130 For each colony and species, we analysed between three and four samples. We selected peaks that  
131 were present in all the samples of the same species. We integrated the area of each peak and  
132 normalised it to the sum of the area of all peaks in a given sample. We then did a principal component  
133 analysis (PCA) for each species, keeping enough components to describe at least 95% of the total  
134 variance. Using components with an F-score, relative to the colony of origin, superior or equal to 0.01,  
135 we computed linear discriminant analysis for each species and brood types separately using the colony  
136 of origin as classification variable with a leave-one sample out cross-validation. To test the significance  
137 of the accuracy of classification obtained, we used permutation tests with 5000 simulations.

138 To assess the variability of the difference between nestmate and non-nestmate chemical signatures  
139 across species, we computed intra and inter-colony Euclidian distance between nestmates and non-  
140 nestmates using the global centroid method [36]. To assess the variation of intra-colony distances  
141 between species, we computed the ratio between intra and inter-colony distances. We then  
142 performed type II ANOVA on linear mixed-effects models (LMM) of the effect of the species of origin  
143 of the samples on the ratios of the intra and inter-colony chemical distances. Sample ID and colony of  
144 origin were used as nested random factors. The colony used for the inter-colony distance was a random  
145 factor as well. P-values were adjusted for multiple comparisons across species for each type of brood  
146 using Holm's method.

147 *Behavioural data*

148 We tested whether the source of the brood item had an effect on two different variables: 1) the  
149 number brood items brought into the refuge in each trial; 2) the total time workers spent antennating  
150 the brood items. The number of brood items brought to refuge was analysed using generalised linear  
151 mixed-effect models (GLMM). For the cumulative duration of antennation, we used LMMs. The colony  
152 of origin of the workers, their group identity, the origin and the order of the brood encountered during  
153 the three trials were used as random factors. Post hoc differences were tested with type II ANOVAs.  
154 P-values were adjusted for multiple comparisons as above.

## 155 Results

### 156 Egg surface hydrocarbons

157 In the extracts of egg surface compounds, we could observe between 21 (*A. senilis* and *L. niger*) and  
158 31 (*C. aethiops*) peaks containing hydrocarbons that were consistently present in samples of the same  
159 species (Figure 1, Supplementary Figure S2). These profiles contained a majority of methyl-alkanes and  
160 a smaller proportion of alkanes. In *T. darioi*, *L. niger* and *F. fusca* egg samples, we also observed a small  
161 proportion of alkenes. (Figure 1.A). The chemical profile of larvae had a lower quantity of hydrocarbons  
162 compared to eggs (Figure 1.B) and a smaller diversity of compounds (Figure 1.A). We found between  
163 5 (in *L. niger* and *F. fusca*) and 9 (in *C. aethiops*) peaks containing hydrocarbons with a majority of  
164 alkanes and a lower proportion of methyl-alkane in almost all species. In *M. barbarus*, both families of  
165 compounds were present in similar numbers (Figure 1.B). We did not observe any alkenes among the  
166 surface hydrocarbons extracted from larvae. The most common compounds are C<sub>23</sub>, C<sub>25</sub> and C<sub>27</sub> (peaks  
167 4, 21 and 45), which are present across all species in surface profiles of both eggs and larvae (Figure  
168 1.C, Supplementary Table S1). The alkane C<sub>28</sub> (peaks 59) was found in all egg samples. In almost all  
169 compounds found in L1 larvae extracts were also present in eggs extracts (Figure 1.C,  
170 Supplementary Table S1). The only exception is a diMeC<sub>24</sub> (peak 15) found on *A. senilis* larvae.

171 Principal component analyses indicate that there is a colony-specific blend of surface hydrocarbons,  
172 (Supplementary Figure S3, Supplementary Table S2). Using a linear discriminant analysis, we observed  
173 that chemical profiles allowed the prediction of the colony of origin of the samples significantly better  
174 than by chance for all the egg samples (permutation test,  $p \leq 0.05$ , Figure 2.A, [37,38]). The accuracy  
175 of prediction of the colony of origin was 100% for *L. niger*, *C. aethiops*, *F. fusca* and *M. barbarus* eggs.  
176 For *T. darioi* and *A. senilis* eggs, the prediction of the colony of origins was not completely accurate  
177 (88.89% and 93.33% respectively). In larvae samples, the hydrocarbon profiles allowed the  
178 identification of the colony of origin in *L. niger*, *C. aethiops*, *F. fusca* and *M. barbarus* (permutation test,  
179  $p \leq 0.05$ , Figure 2.A). However, unlike for egg samples, the accuracy of prediction of the colony of origin  
180 was 100% only for *C. aethiops* and *F. fusca*. Regarding *M. barbarus* and *L. niger* L1 larvae, the  
181 predictions were accurate around two thirds of the time. For *T. darioi* and *A. senilis* L1 samples,  
182 prediction of the colony of origin was inaccurate and not different from random.

183 To compare the difference between colony hydrocarbon profiles across species, we normalised the  
184 nestmate chemical distances relative to the non-nestmate distances in each species (Figure 2.B). The  
185 difference in colony signatures are similar for larvae and for eggs in most species. However, in *L. niger*  
186 and *F. fusca* eggs differences in colony signatures are larger compared to *T. darioi*, *C. aethiops* and *M.*  
187 *barbarus* nestmate to non-nestmate distances (LMM,  $p \leq 0.05$ , Type II ANOVA; Supplementary Table  
188 S3). Consistently with our analysis of the existence of a colony signature in the chemical profiles of  
189 eggs, the large majority of ratios between nestmate and non-nestmate eggs chemical distances are  
190 inferior to one (*i.e.* distance between nestmates is smaller than between non-nestmates). For larvae,  
191 cases of ratios superior to one (*i.e.* distance between nestmates is greater than between non-  
192 nestmates) appear more frequently, which is consistent with our observations that colony signatures  
193 are either absent or less clear on L1 larvae.

194

### 195 Brood discrimination by ant workers

196 From the results of our chemical analysis, we would predict that ant workers are able to discriminate  
197 between homo-specific and hetero-specific brood. The discrimination between nestmate and non-  
198 nestmate would be possible for eggs but more difficult for L1 larvae, especially in *A. senilis* and *T. darioi*.

199 Using behavioural assays, we measured the number of brood items retrieved by workers (Figure 3.A)  
200 as well as the time they spent antennating the brood (Figure 3.B).

201 For *T. darioi*, nestmate eggs were retrieved significantly more frequently compared to hetero-specific  
202 items (GLMM,  $p \leq 0.05$ , Type II ANOVA; Supplementary Table S4). We observed no differences in the  
203 number of non-nestmate and hetero-specific eggs retrieved by *T. darioi* workers. *L. niger* workers  
204 brought significantly more nestmate eggs into the refuge compared to non-nestmate and hetero-  
205 specific eggs (GLMM,  $p \leq 0.05$ , Type II ANOVA; Supplementary Table S4). The number of non-nestmate  
206 eggs retrieved by *L. niger* workers was higher than the number of hetero-specific ones. The results for  
207 *A. senilis*, *C. aethiops*, *L. niger* and *M. barbarus* assays were similar: workers transported significantly  
208 more nestmate and non-nestmate eggs than hetero-specific ones into the refuge (GLMM,  $p \leq 0.05$ ,  
209 Type II ANOVA; Supplementary Table S4). There was no significant difference between the number of  
210 nestmate and non-nestmate eggs retrieved by workers.

211 Regarding L1 larvae, *T. darioi* workers retrieved significantly more nestmate L1 larvae than non-  
212 nestmate and hetero-specific ones. There were no differences in the, almost null, number of non-  
213 nestmate and hetero-specific larvae retrieved by *T. darioi* workers. Observations for *L. niger*, *A. senilis*,  
214 *C. aethiops*, and *M. barbarus* L1 larvae trials were similar. The number of nestmate and non-nestmate  
215 L1 larvae transported into the refuge by workers were similar and significantly higher than the number  
216 of hetero-specific L1 larvae. Overall, the results of the behavioural assays show that ant workers are  
217 able to discriminate between homo-specific and hetero-specific eggs and L1 larvae. Furthermore, we  
218 observed that *L. niger* and *T. darioi* discriminate between nestmate and non-nestmate eggs and only  
219 *T. darioi* workers discriminate between nestmate and non-nestmate L1 larvae.

220 Antennation allows ants to use their chemical and mechanical sensors to explore items. A longer  
221 antennation time is a sign of a higher interest or more complex identification of the item. *A. senilis* and  
222 *M. barbarus* workers spent significantly more time antennating nestmate and non-nestmate eggs  
223 compared to hetero-specific eggs (LMM,  $p \leq 0.05$ , Type II ANOVA; Supplementary Table S5). *L. niger*  
224 workers antennated for a significantly longer time nestmate and non-nestmate L1 larvae when  
225 compared to hetero-specific ones (LMM,  $p \leq 0.05$ , Type II ANOVA; Supplementary Table S5). For *C.*  
226 *aethiops*, antennation times were significantly shorter when comparing nestmate to non-nestmate  
227 and hetero-specific L1 larvae (LMM,  $p \leq 0.05$ , Type II ANOVA; Supplementary Table S5). Finally, *A.*  
228 *senilis* workers spent less time antennating nestmate and hetero-specific L1 larvae compared to non-  
229 nestmate larvae (LMM,  $p \leq 0.05$ , Type II ANOVA; Supplementary Table S5).

230 Overall, our behavioural trials show that ant workers discriminate between brood items from their  
231 colony and hetero-specific ones. However, discrimination between nestmate and homo-specific non-  
232 nestmate brood is evident only in *L. niger* and *T. darioi*.



## 233 Discussion

234 Our chemical analysis and behavioural trials allow a better understanding of species and colony-level  
235 chemical cues in the early brood stages of Formicoid ants as well as the discriminatory behaviour that  
236 is dependent on those cues. The quantity and the diversity of cues displayed is clearly smaller in first  
237 instar larvae compared to eggs in all species studied. This supports the hypothesis that when larvae  
238 hatch from the egg the hydrocarbons are not transferred from the egg's chorion to the larval cuticle.

239 The hydrocarbons observed on the surface of egg and L1 larvae are similar to those found in adults  
240 [15,39]. As such, they should be detected by the sensory systems of all ant species [40]. Our chemical  
241 analysis clearly showed that the surface hydrocarbons of eggs and L1 larvae are different among  
242 species. The inter-specific differences allow ant workers to discriminate both eggs and larvae of their  
243 species from brood of a different species in all our behavioural trials. This is consistent with what has  
244 been observed for eggs in some *Formica* species [5,41].

245 Are ants able to recognise the colony of origin of conspecific eggs? We observed colony-specific blend  
246 of hydrocarbons on eggs, suggesting that the display of colony cues on eggs is a trait present across  
247 the Formicoid ants (three of the five subfamilies). This is consistent with observations in seven *Formica*  
248 species [25]. Despite the presence of colony-specific cues, only *T. darioi* and *L. niger* workers  
249 discriminated against non-nestmate eggs in our behavioural trials. Data from the literature show that  
250 *F. fusca* workers and larvae discriminate against non-nestmate eggs [42,43]. Interestingly, our results  
251 showed that discrimination against non-nestmate eggs is not consistently correlated with larger  
252 differences between nestmate and non-nestmate odours. This indicates that non-nestmate  
253 discrimination can rely both on clearer display of the colony of origin or more accurate recognition of  
254 the cues displayed.

255 Can workers recognise nestmate first instar larvae? Our chemical analysis and behavioural trials with  
256 L1 larvae draw a less clear picture than for eggs. Data in the literature are also scant. Larvae from both  
257 Formicinae species we studied (*L. niger* and *C. aethiops*) and those from *M. barbarus* (Myrmicinae)  
258 display a colony-specific chemical signature. However, these signatures did not allow for reliable  
259 identification of the colony of origin in two species from different subfamilies (*M. barbarus* and *L.*  
260 *niger*). We could not demonstrate the presence of a colony signature in the surface hydrocarbons of  
261 *T. darioi* (Dolichoderinae) and *A. senilis* (Myrmicinae) larvae. Surprisingly, *T. darioi* workers were the  
262 only ones discriminating between nestmate and non-nestmate larvae, which indicates that the larvae  
263 do display enough cues for colony recognition. This means that *T. darioi* workers either act on chemical  
264 cues that our method of analysis could not detect or use non-chemical cues. However, to our  
265 knowledge, the literature does not support the hypothesis that workers use non-chemical cues (*e.g.*  
266 visual or auditory) for nestmate larvae recognition. As such, the hypothesis that *T. darioi* first instar  
267 larvae displaying a colony odour seems the most plausible.

268 We observed *A. senilis* and *C. aethiops* workers behaving differently when facing nestmate larvae  
269 compared to non-nestmate larvae (*i.e.* different antennation durations). Is this an indication that they  
270 are able to recognise nestmate L1 larvae from non-nestmate larvae? On *C. aethiops* L1 larvae, we could  
271 detect a colony-level chemical signature. We could not do so on *A. senilis* first instar larvae, but neither  
272 could we on *T. darioi* larvae despite the clear behavioural evidences that they do display a colony  
273 signature. Given the lower overall quantity of surface hydrocarbons on L1 larvae compared to eggs,  
274 the chemical cues displayed might challenge the olfactory detection system of ant workers and the  
275 presence of non-nestmate cues might appear ambiguous to them. The long antennation time observed  
276 would then be a sign of the ant's difficulty to recognize the signature. Similar hesitation has been  
277 observed for recognition of ambiguous colony cues on adults [44].



278 Taken together, our observations allow us to confidently state that workers recognise and favour  
279 nestmate first instar larvae only for *T. darioi*. In the other species, the cues are either too challenging  
280 to recognise for the workers or they just don't act on them. Discrimination against non-nestmate eggs,  
281 doesn't implies favouring nestmate first instar larvae. This differences across stages in non-nestmate  
282 discrimination probably arose from the differences in the quality and the diversity of the chemical cues  
283 displayed as the surface of the brood. Unlike eggs, larvae likely have to synthesize the chemical cues  
284 they display from the first day of their life.

285 Looking at our observations and those from the literature with a phylogenetic perspective supports  
286 the hypothesis that egg surface hydrocarbons display sufficient information for ant workers to  
287 discriminate nestmate from non-nestmate eggs across most of the ants' phylogenetic tree. The  
288 predominance of non-nestmate eggs discrimination in the majority of the Formicoid ant subfamily  
289 studied (2 out of 3) would indicates that the last common ancestor of Formicoid ants was  
290 discriminating against non-nestmate eggs. *Dinoponera quadriceps* workers also favour nestmate eggs  
291 [21]. The last common ancestor of Formicoids and Poneroids would have been also discriminating  
292 against non-nestmate eggs, but these evolutionary hypotheses require more work to be supported.

293 The three Formicoid species that discriminate against non-nestmate eggs belong to genera prone to  
294 social parasitism. Indeed, *L. niger* is host to various social parasites from the *Lasius* genus [11]. And the  
295 *Tapinoma* genus is known to be subject to parasitism by *Bothriomyrmex* species [10,11]. Furthermore,  
296 host species of the *Formica* genus also discriminate against non-nestmate eggs [41]. Our results and  
297 those from the literature are thus in accordance with the hypothesis that higher non-nestmate brood  
298 discrimination could arise from the arms race between social parasites and host species [43]. The  
299 parasites trying to get themselves recognised as nestmates inducing a more strict discrimination of  
300 eggs as a species level adaptation in hosts [13].

301 Discrimination can lead to costly errors [45]. Accordingly, the three species we studied which are not  
302 subject to an arms race with social parasites do not discriminate against non-nestmate brood. Brood  
303 adoption appears less risky in those non-host species while recognition errors (discarding of nestmate  
304 brood) represent a potential loss to the colony's fitness. This would explain the reduction or  
305 disappearance of the discriminatory behaviour against non-nestmate eggs. Identification of first instar  
306 larvae, which do not display as much chemical cues as eggs, appears a more challenging task, which  
307 prevents a stricter non-nestmate discrimination in most species even parasitized ones. Overall, our  
308 results support the hypothesis that social parasites induce a selective pressure on host species, which  
309 maintain the discrimination against non-nestmate eggs while non-host species are less selective for  
310 brood retrieval.

## 311 References

- 312 1. Khila A, Abouheif E. 2008 Reproductive constraint is a developmental mechanism that maintains  
313 social harmony in advanced ant societies. *Proceedings of the National Academy of Sciences* **105**,  
314 17884–17889. (doi:10.1073/pnas.0807351105)
- 315 2. Khila A, Abouheif E. 2010 Evaluating the role of reproductive constraints in ant social evolution.  
316 *Philosophical Transactions of the Royal Society B: Biological Sciences* **365**, 617–630.  
317 (doi:10.1098/rstb.2009.0257)
- 318 3. Lenoir A. 1981 Brood retrieving in the ant, *Lasius niger* L. *Sociobiology* **6**, 153–178.
- 319 4. Meudec M. 1978 Response to and transport of brood by workers of *Tapinoma erraticum*  
320 (Formicidae; Dolichoderinae) during nest disturbance. *Behavioural Processes* **3**, 199–209.  
321 (doi:10.1016/0376-6357(78)90013-X)
- 322 5. Schultner E, Pulliainen U. 2020 Brood recognition and discrimination in ants. *Insect. Soc.* **67**, 11–  
323 34. (doi:10.1007/s00040-019-00747-3)
- 324 6. Fénéron R, Jaisson P. 1995 Ontogeny of nestmate brood recognition in a primitive ant, *Ectatomma*  
325 *tuberculatum* Olivier (Ponerinae). *Animal Behaviour* **50**, 9–14. (doi:10.1006/anbe.1995.0215)
- 326 7. Fouks B, d’Ettorre P, Nehring V. 2011 Brood adoption in the leaf-cutting ant *Acromyrmex*  
327 *echinator*: Adaptation or recognition noise? *Insectes Sociaux* **58**, 479–485. (doi:10.1007/s00040-  
328 011-0167-9)
- 329 8. Madsen, Offenberg. 2017 Effect of pleometrosis and brood transplantation on colony growth of  
330 the black garden ant, *Lasius niger*. *Asian Myrmecology* **9**, 1–11. (doi:10.20362/AM.009003)
- 331 9. Paul B, Annagiri S. 2019 Caught red-handed: behaviour of brood thieves in an Indian ant. *Journal*  
332 *of Experimental Biology* **222**. (doi:10.1242/jeb.193755)
- 333 10. Lenoir A, d’Ettorre P, Errard C, Hefetz A. 2001 Chemical Ecology and Social Parasitism in Ants.  
334 *Annual Review of Entomology* **46**, 573–599. (doi:10.1146/annurev.ento.46.1.573)
- 335 11. Buschinger A. 2009 Social parasitism among ants: A review (Hymenoptera: Formicidae).  
336 *Myrmecological News* **12**, 219–235.
- 337 12. Sato I, Iwasa Y. 2019 Chemical mimicry or crypsis—the evolutionary game played by parasitic ants  
338 invading other colonies. *Theoretical Ecology* , 1–9. (doi:10.1007/s12080-018-0406-z)
- 339 13. Grüter C, Jongepier E, Foitzik S. 2018 Insect societies fight back: the evolution of defensive traits  
340 against social parasites. *Philosophical Transactions of the Royal Society B: Biological Sciences* **373**,  
341 20170200. (doi:10.1098/rstb.2017.0200)
- 342 14. Sturgis SJ, Gordon DM. 2012 Nestmate recognition in ants (Hymenoptera: Formicidae): A review.  
343 *Myrmecological News* **16**, 101–110.
- 344 15. van Zweden JS, d’Ettorre P. 2010 Nestmate recognition in social insects and the role of  
345 hydrocarbons. In *Insect Hydrocarbons Biology, Biochemistry, and Chemical Ecology* (eds GJ  
346 Blomquist, A-G Bagnères), pp. 222–243. Cambridge: Cambridge University Press.  
347 (doi:10.1017/CBO9780511711909.012)

- 348 16. van Zweden JS, Brask JB, Christensen JH, Boomsma JJ, Linksvayer TA, d’Ettorre P. 2010 Blending of  
349 heritable recognition cues among ant nestmates creates distinct colony gestalt odours but  
350 prevents within-colony nepotism. *Journal of Evolutionary Biology* (doi:10.1111/j.1420-  
351 9101.2010.02020.x)
- 352 17. Liang D, Silverman J. 2000 “You are what you eat”: Diet modifies cuticular hydrocarbons and  
353 nestmate recognition in the Argentine ant, *Linepithema humile*. *Naturwissenschaften* **87**, 412–  
354 416. (doi:10.1007/s001140050752)
- 355 18. Lenoir A, Depickère S, Devers S, Christidès J-P, Detrain C. 2009 Hydrocarbons in the Ant *Lasius*  
356 *niger*: From the Cuticle to the Nest and Home Range Marking. *Journal of Chemical Ecology* **35**,  
357 913–921. (doi:10.1007/s10886-009-9669-6)
- 358 19. d’Ettorre P, Heinze J, Ratnieks FLW. 2004 Worker policing by egg eating in the ponerine ant  
359 *Pachycondyla inversa*. *Proceedings of the Royal Society of London. Series B: Biological Sciences* **271**,  
360 1427–1434. (doi:10.1098/rspb.2004.2742)
- 361 20. Endler A, Liebig J, Schmitt T, Parker JE, Jones GR, Schreier P, Hölldobler B. 2004 Surface  
362 hydrocarbons of queen eggs regulate worker reproduction in a social insect. *Proceedings of the*  
363 *National Academy of Sciences of the United States of America* **101**, 2945–2950.  
364 (doi:10.1073/pnas.0308447101)
- 365 21. Tannure-Nascimento IC, Nascimento FS, Dantas JO, Zucchi R. 2009 Decision rules for egg  
366 recognition are related to functional roles and chemical cues in the queenless ant *Dinoponera*  
367 *quadriceps*. *Naturwissenschaften* **96**, 857–861. (doi:10.1007/s00114-009-0535-8)
- 368 22. van Zweden JS, Heinze J, Boomsma JJ, d’Ettorre P. 2009 Ant queen egg-marking signals: Matching  
369 deceptive laboratory simplicity with natural complexity. *PLoS ONE* **4**, e4718.  
370 (doi:10.1371/journal.pone.0004718)
- 371 23. Holman L *et al.* 2010 Identification of an ant queen pheromone regulating worker sterility.  
372 *Proceedings of the Royal Society B: Biological Sciences* **277**, 3793–3800.  
373 (doi:10.1098/rspb.2010.0984)
- 374 24. Ruel C, Lenoir A, Cerdá X, Boulay R. 2013 Surface lipids of queen-laid eggs do not regulate queen  
375 production in a fission-performing ant. *Naturwissenschaften* **100**, 91–100. (doi:10.1007/s00114-  
376 012-0997-y)
- 377 25. Helanterä H, d’Ettorre P. 2015 A comparative study of egg recognition signature mixtures in  
378 *Formica* ants. *Evolution* **69**, 520–529. (doi:10.1111/evo.12590)
- 379 26. Schal C, Sevala VL, Young HP, Bachmann JAS. 1998 Sites of Synthesis and Transport Pathways of  
380 Insect Hydrocarbons: Cuticle and Ovary as Target Tissues. *Am Zool* **38**, 382–393.  
381 (doi:10.1093/icb/38.2.382)
- 382 27. Schultner E, Oettler J, Helanterä H. 2017 The Role of Brood in Eusocial Hymenoptera. *The Quarterly*  
383 *Review of Biology* **92**, 39–78. (doi:10.1086/690840)
- 384 28. d’Ettorre P, Tofilski A, Heinze J, Ratnieks FLW. 2006 Non-transferable signals on ant queen eggs.  
385 *Naturwissenschaften* **93**, 136–140. (doi:10.1007/s00114-005-0075-9)

- 386 29. Juárez MP, Fernández GC. 2007 Cuticular hydrocarbons of triatomines. *Comparative Biochemistry*  
387 *and Physiology Part A: Molecular & Integrative Physiology* **147**, 711–730.  
388 (doi:10.1016/j.cbpa.2006.08.031)
- 389 30. Howard RW, Blomquist GJ. 2004 Ecological, Behavioral, and Biochemical Aspects of Insect  
390 Hydrocarbons. *Annual Review of Entomology* **50**, 371–393.  
391 (doi:10.1146/annurev.ento.50.071803.130359)
- 392 31. Villalta I, Amor F, Cerdá X, Boulay R. 2016 Social coercion of larval development in an ant species.  
393 *The Science of Nature* **103**, 18. (doi:10.1007/s00114-016-1341-8)
- 394 32. Moreau CS, Bell CD, Vila R, Archibald SB, Pierce NE. 2006 Phylogeny of the Ants: Diversification in  
395 the Age of Angiosperms. *Science* **312**, 101–104. (doi:10.1126/science.1124891)
- 396 33. Friard O, Gamba M. 2016 BORIS: a free, versatile open-source event-logging software for  
397 video/audio coding and live observations. *Methods in Ecology and Evolution* **7**, 1325–1330.  
398 (doi:10.1111/2041-210X.12584)
- 399 34. RStudio Team. 2015 *RStudio: Integrated Development Environment for R*. Boston, MA: RStudio,  
400 Inc. See <http://www.rstudio.com/>.
- 401 35. R Core Team. 2019 *R: A Language and Environment for Statistical Computing*. Vienna, Austria: R  
402 Foundation for Statistical Computing. See <https://www.R-project.org/>.
- 403 36. van Zweden JS, Pontieri L, Pedersen JS. 2014 A statistical approach to identify candidate cues for  
404 nestmate recognition. *Front. Ecol. Evol.* **2**. (doi:10.3389/fevo.2014.00073)
- 405 37. Ojala M, Garriga GC. 2010 Permutation tests for studying classifier performance. *Journal of*  
406 *Machine Learning Research* **11**.
- 407 38. Koul A, Becchio C, Cavallo A. 2018 PredPsych: A toolbox for predictive machine learning-based  
408 approach in experimental psychology research. *Behav Res* **50**, 1657–1672. (doi:10.3758/s13428-  
409 017-0987-2)
- 410 39. Provost E, Riviere G, Roux M, Bagnères AG, Clement JL. 1994 Cuticular hydrocarbons whereby  
411 *Messor barbarus* ant workers putatively discriminate between monogynous and polygynous  
412 colonies. Are workers labeled by queens? *Journal of Chemical Ecology* **20**, 2985–3003.  
413 (doi:10.1007/BF02098404)
- 414 40. Sharma KRR *et al.* 2015 Cuticular Hydrocarbon Pheromones for Social Behavior and Their Coding  
415 in the Ant Antenna. *Cell Reports* **12**, 1261–1271. (doi:10.1016/j.celrep.2015.07.031)
- 416 41. Chernenko A, Helanterä H, Sundström L. 2011 Egg Recognition and Social Parasitism in *Formica*  
417 *Ants*. *Ethology* **117**, 1081–1092. (doi:10.1111/j.1439-0310.2011.01972.x)
- 418 42. Helanterä H, Sundström L. 2007 Worker policing and nest mate recognition in the ant *Formica*  
419 *fusca*. *Behavioral Ecology and Sociobiology* **61**, 1143–1149. (doi:10.1007/s00265-006-0327-5)
- 420 43. Pulliainen U, Helanterä H, Sundström L, Schultner E. 2019 The possible role of ant larvae in the  
421 defence against social parasites. *Proceedings. Biological sciences* **286**, 20182867.  
422 (doi:10.1098/rspb.2018.2867)

- 423 44. Nascimento FS, Tannure-Nascimento IC, Dantas JO, Turatti IC, Lopes NP. 2013 Task-Related  
424 Variation of Cuticular Hydrocarbon Profiles Affect Nestmate Recognition in the Giant ant  
425 *Dinoponera quadriceps*. *J Insect Behav* **26**, 212–222. (doi:10.1007/s10905-012-9353-5)
- 426 45. Rossi N, Baracchi D, Giurfa M, d’Ettorre P. 2018 Pheromone-Induced Accuracy of Nestmate  
427 Recognition in Carpenter Ants: Simultaneous Decrease in Type I and Type II Errors. *The American*  
428 *Naturalist* **193**, 267–278. (doi:10.1086/701123)
- 429

430 [Acknowledgements](#)

431 The authors would like to thanks Baptiste Piqueret and Swetashree Kolay for their commentary on the  
432 design of the experimental protocols and the data analysis. Arthur de Fouchier, Patrizia d’Ettorre and  
433 Abderhaman Khila contribution to this work has been supported by the grant ANR-17-CE13-0008  
434 SocioDev.

435

436 [Data availability](#)

437 Data used for the analysis performed will be deposited on DRYAD when manuscript will be submitted.



438 **Figures legends**

439 **Figure 1: Chemical profiles of egg and L1 larvae**

440 **A)** Bar plots of the number of hydrocarbon compounds identified in egg and L1 larvae surface extracts  
441 grouped by families: alkane (light grey), alkene (medium grey) and methyl-branched alkane (m-alkane,  
442 dark grey). **B)** Boxplots of the total area of the compounds identified in hydrocarbon compounds  
443 identified in egg and L1 larvae surface extracts grouped by families (same as in A). **C)** Boxplots of the  
444 normalised area of the compounds identified in hydrocarbon compounds identified in egg and L1  
445 larvae surface extracts. The family of the compounds are displayed as in A.

446

447 **Figure 2: Colony specific hydrocarbon signature of ant early brood**

448 **A)** Precisions of the linear discriminant analysis for each colony in each sample types performed from  
449 the principal components, displayed in Supplementary Figure S3, that had an F-score superior or equal  
450 to 0.01. The black narrower lines represent the mean precision for each sample type. The red wider  
451 line represents a random precision. Significance of the difference of mean precisions compared to a  
452 random precision were computed with a permutation test. NS:  $p \geq 0.05$  ; \* :  $p \leq 0.05$  ; \*\* :  $p \leq 0.01$  ;  
453 \*\*\* :  $p \leq 0.001$ . **B)** Ratios of the Euclidian distances between nestmate and non-nestmate measured  
454 with the global-centroid method from the principal components, displayed in A, that had an F-score  
455 superior or equal to 0.01. Black dots represent outlier values that are 1.5 times outside the  
456 interquartile range. Letters represent groups of statistical similarity in each sample type (LMM ; Type  
457 II Anova ;  $p \leq 0.05$ ).

458

459 **Figure 3: Worker behaviour towards early brood**

460 **A)** Boxplots of the number of nestmate (NM), non-nestmate (NNM) and hetero-specific (Mbar, Lnig or  
461 Ffus) eggs or larvae brought into the refuge by workers in all the behavioural trials. **B)** Boxplots of the  
462 total time spent by workers antennating brood during the trials where they displayed those  
463 behaviours. Diamonds represent the means. Letters show groups of statistical similarity in each species  
464 (LMM ; Type II Anova ;  $p \leq 0.05$ ). Black dots represent outlier values that are 1.5 times outside the  
465 interquartile range.

466 [Supplementary Figures](#)

467 [Supplementary Figure S1: Disposition of the arenas of the behavioural assays](#)

468 Six workers (three from outside the nest and three from inside the nest) in an eight cm arena with  
469 Fluon<sup>®</sup>-coated walls and a filter paper as floor. The red tube is a refuge made of a red-coated 1.5mL  
470 Eppendorf tube that had spent at least twenty-four hours in the colony box. Inside the refuge, the  
471 three late-instar larvae were given to the worker 24h prior experimentation. Outside the refuge, the  
472 three L1 larvae (either nestmate, non-nestmate or hetero-specific) are the ones given to the workers  
473 during the trials.

474

475 [Supplementary Figure S2: Brood items surface extracts](#)

476 Representative chromatograms of surface extracts of *A. senilis*, *C. aethiops*, *L. niger*, *M. barbarus* and  
477 *T. darioi* eggs and L1 larvae. Each peak with a number result from hydrocarbons that are found  
478 consistently across all samples of the same species and brood type (detailed in Supplementary Table  
479 S1).

480

481 [Supplementary Figure S3: PCA dimensions heatmaps](#)

482 Heatmaps of the principal components representing 95% of the initial variability of the normalised  
483 areas of the peaks obtained from surface extracts of eggs and L1 larvae. The values of the principal  
484 components are normalised relative to the highest absolute value observed for each principal  
485 component in each samples type. Each line is an individual sample. Samples from the same colony are  
486 grouped into the same square.

487 [Supplementary tables legends](#)

488 [Supplementary Table S1: Compounds identified in egg surface hydrocarbons extracts](#)

489 Name, Peak ID, family and mean retention time of peaks containing hydrocarbons founds in the surface  
490 chemicals extracts from *A. senilis*, *C. aethiops*, *L. niger*, *M. barbarus* and *T. darioi* eggs and L1 larvae.

491

492 [Supplementary Table S2: Percentage of variance explained by the dimensions of the principal  
493 component analyses.](#)

494 Eigenvalues, percentages of variance and cumulative percentage of variance of the principal  
495 components of the principal component analysis performed from the normalised areas of the selected  
496 hydrocarbons peak observed in eggs and L1 larvae surface extracts. Only principal components  
497 explaining at least 95% of the original variance are displayed.

498

499 [Supplementary Table S3: Results of the statistical analysis of nestmate / non-nestmate Euclidian  
500 distances](#)

501 Adjusted  $R^2$ , P values of type II ANOVA and significance of those P values for the LMM of a base ten  
502 logarithmic transformation of the ratio between nestmate and non-nestmate Euclidian distances  
503 measured with the global centroid method. These values are displayed for the test of effects of  
504 different variables on the dependant variable of the models.

505

506 [Supplementary Table S4: Results of the statistical analysis of the number of brood items  
507 transported into the refuge by workers](#)

508 Adjusted  $R^2$ ,  $\chi^2$ , P values of type II ANOVA and significance of those P values for the binomial GLMM  
509 for proportional data of the number of brood items transported into the refuges by workers depending  
510 on the colony of origin of the brood (NM: nestmate, NNM: non-nestmate).

511

512 [Supplementary Table S5: Results of the statistical analysis of the cumulative times spent by  
513 workers antennating brood items](#)

514 Adjusted  $R^2$ ,  $\chi^2$ , P values of type II ANOVA and significance of those P values for the LMM of a base ten  
515 logarithmic transformation of the cumulative time spent by workers antennating brood items  
516 depending on the colony of origin of the brood (NM: nestmate, NNM: non-nestmate).

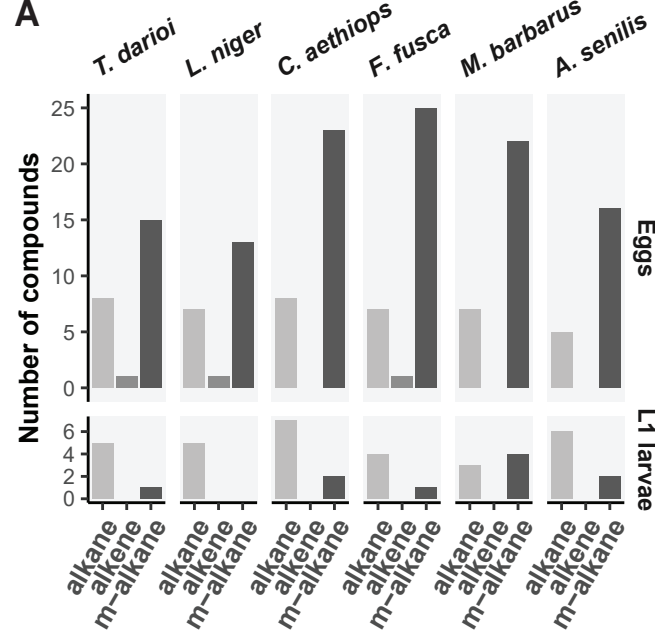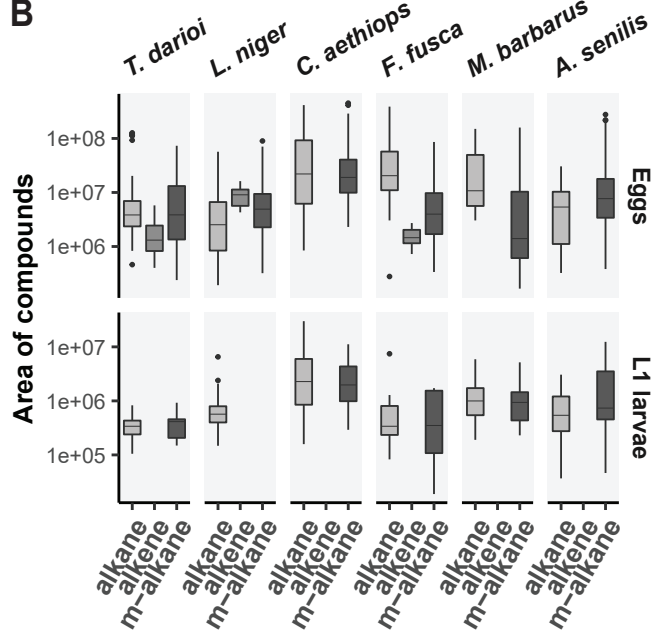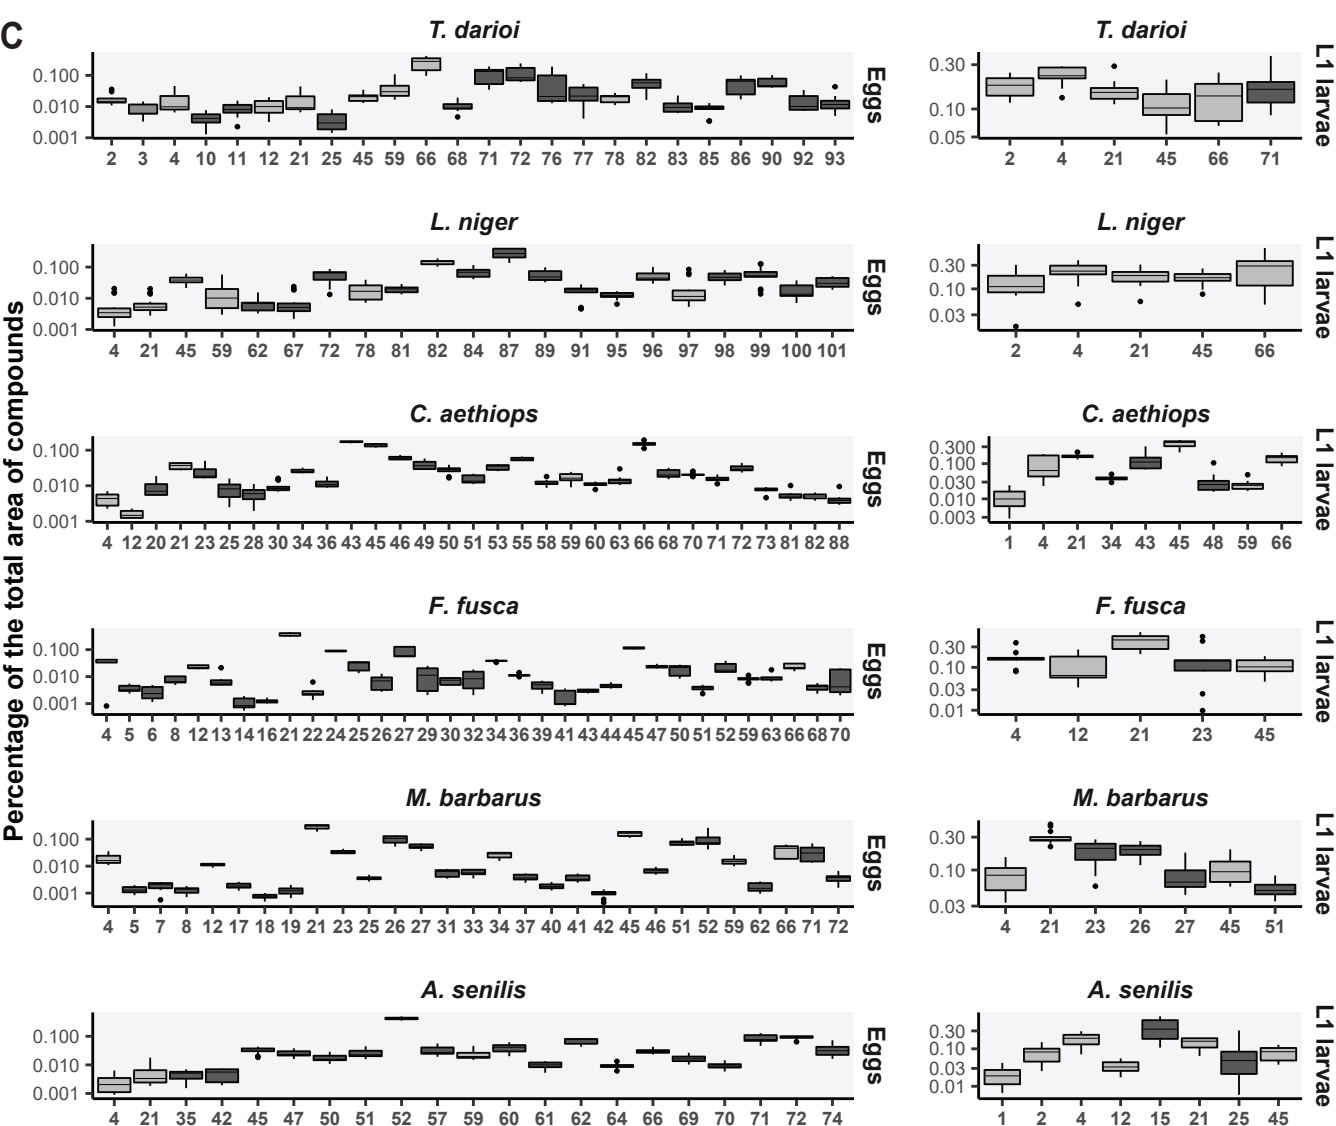

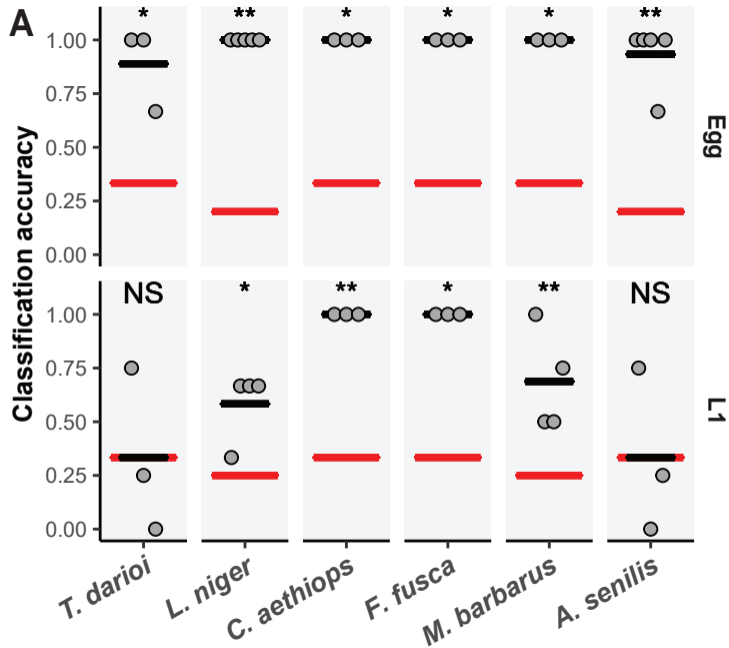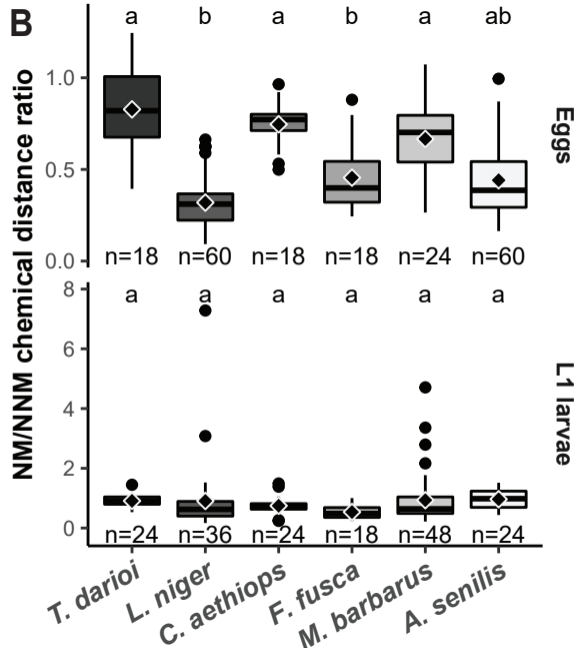

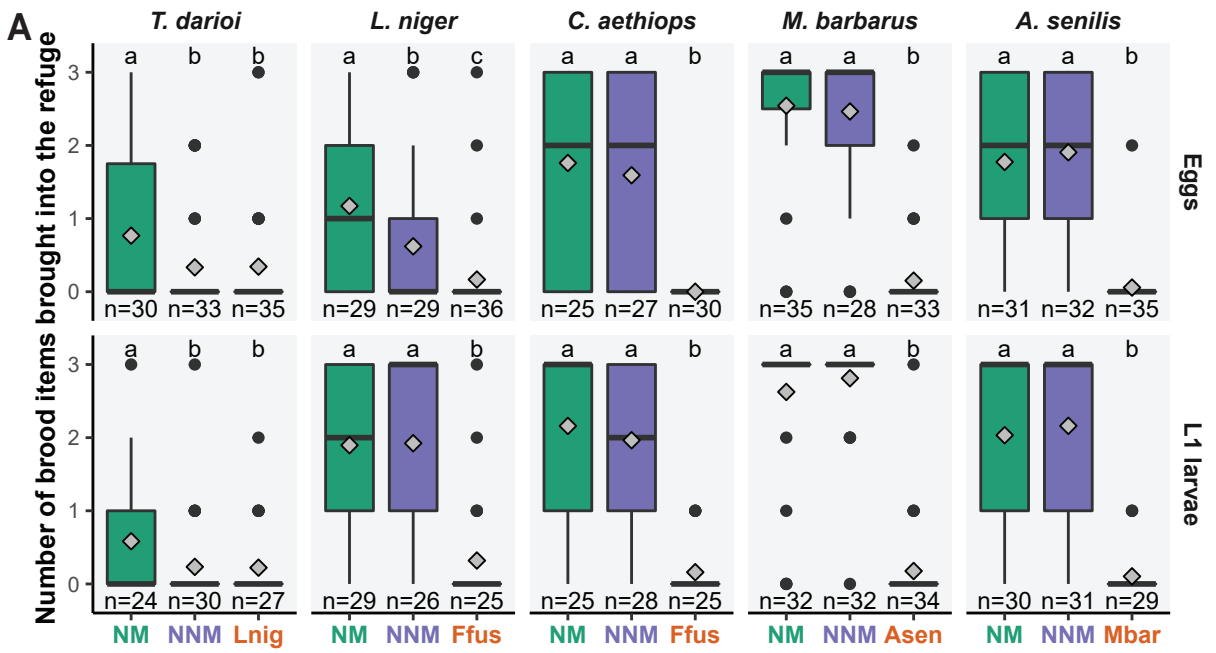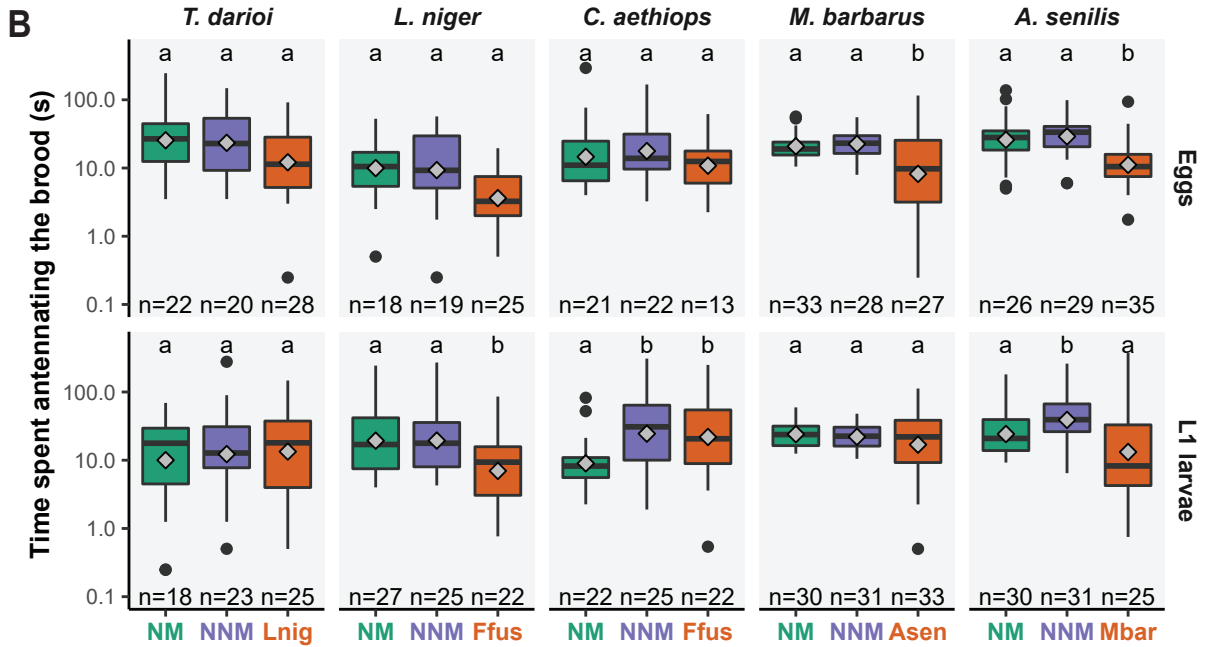

Source: http://biorxiv.org/cgi/content/short/2021.03.17.435807v1.pdf
