19 **Abstract**

20           Brood is critically important in social insect colonies. It carries the colony's fitness through  
21 delivering future reproductive adults as well as workers that will increase the colony's workforce.  
22 Adoption of non-nestmate brood can increase the colony workforce but entails the risk of rearing  
23 unrelated sexuals or social parasites. Thus, theory would predict that ant workers will evolve the ability  
24 to discriminate between nestmate and alien brood using the chemical cues displayed at the brood's  
25 surface. This appears especially true for eggs and first instar (L1) larvae, which require more resources  
26 before becoming adult workers compared to older brood. However, the chemical signature of ant early  
27 brood stages and its recognition by workers remains understudied. To fill this gap, we investigated the  
28 chemical basis of early brood nestmate and cross-species recognition in six ant species. We also tested  
29 the discrimination behaviour of workers in brood retrieval trials. We observed species-level cues and  
30 discrimination against hetero-specific brood. We also found that eggs and most L1 larvae displayed a  
31 colony signature. However, only some species discriminated against non-nestmate early brood.  
32 Interestingly, these species belong to genera subject to brood parasitism. We hypothesize that non-  
33 nestmate brood discrimination could arise from species adaptations against brood parasitism.

34

35 **Keywords**

36   Ants, Brood retrieval, Cuticular hydrocarbons, Nestmate recognition, Social insects

## 37 Introduction

38 Recognizing offspring is a key issue for parents in many animal species. It allows them to  
39 increase their fitness through proper investment in parental care (Trivers, 1972). Parents use various  
40 cues to recognize their kin, including acoustic (Searby et al., 2004), visual (Mateo, 2015), chemosensory  
41 (d’Ettorre, 2020) or contextual cues (Penn & Frommen, 2010). A well-known example of failed kin  
42 recognition that leads to decreased fitness is the cuckoo bird brood parasitism (Payne & Sorensen,  
43 2005). Cuckoo birds take advantage of parents that care for chicks that hatch in their nest (contextual  
44 cue) and lay their eggs in the nest of these host birds. The cuckoo chick typically hatches first, discards  
45 other eggs in the nest, and becomes the only recipient of care from the host parents.

46 Hymenopteran social insects (some wasps and bees, and all the ants) are classical models for  
47 kin recognition as well (d’Ettorre, 2020). They usually recognise nestmates, that is individuals from the  
48 same group (colony), as a proxy of kin recognition (Bos & d’Ettorre, 2012). This recognition is important  
49 for cooperating with nestmates while competing for resources with non-nestmates. Kin and/or  
50 nestmate recognition is even more important for social insects, compared to many other social  
51 animals, as they show reproductive division of labour. This means that workers, which are fully or  
52 virtually sterile (Fletcher & Ross, 1985; Khila & Abouheif, 2008, 2010), achieve fitness indirectly by  
53 rearing their mother’s brood. This provides future reproductive individuals (males and queens) or  
54 increases the workforce of colony to ultimately produce more offspring.

55 This reproductive division of labour is a hallmark of highly social societies and places brood at  
56 the centre of ant colonies. Workers promptly retrieve eggs and larvae found outside the nest (Lenoir,  
57 1981), and secure them in case of colony disturbance (Meudec, 1978). Behavioural studies have shown  
58 that ant workers adopt brood from other nests, and even other species, while keeping a preference  
59 for nestmate eggs and larvae (Schultner & Pulliainen, 2020).

60 Brood adoption is an adaptive behaviour as larvae raised in a foreign and unrelated nest may  
61 eventually integrate the colony’s workforce (Fénéron & Jaisson, 1995; Fouks et al., 2011). Incipient  
62 colonies of *Lasius niger* and *Messor pergandei* often raid brood from neighbouring colonies to increase

63 their chance of survival (Madsen & Offenberg, 2017). Brood theft can also take place during nest  
64 relocation (Paul & Annagiri, 2019). However, adopting non-nestmate brood entails a risk. Some ant  
65 species are subject to social parasites, which take advantage of the workers of the host colony to raise  
66 their own brood, which has a negative impact on the fitness of host colonies (Buschinger, 2009; Lenoir  
67 et al., 2001).

68 In theory, adopting non-nestmate brood involves a trade-off, for ant workers, between the  
69 gain of future workforce and the potential cost of raising unrelated reproductive individuals or a social  
70 parasite (Fouks et al., 2011). It appears thus adaptive to develop counter-measures to avoid such risks.  
71 The net gain of adopting early brood, eggs and first instar (L1) larvae, is decreased by the higher  
72 amount of resources needed for such brood to develop into workers. Furthermore, early female brood  
73 caste is usually not yet determined (Trible & Kronauer, 2017), which further increases the risk of  
74 adopting an unrelated future queen. Among the possible adaptations, there is the ability of workers  
75 to recognize intruding non-nestmate adults and brood (Satoi & Iwasa, 2019). Stricter discrimination  
76 against individuals not matching the colony's signature entails a risk of recognition errors (Reeve,  
77 1989), but appears beneficial when it occurs in populations subject to brood parasitism (Grüter et al.,  
78 2018). While one could predict that parasitized species could develop such adaptation, the accuracy  
79 of this hypothesis remains elusive (Buschinger, 2009; Lenoir et al., 2001).

80 Ants are usually efficient in recognizing non-nestmates and behave aggressively toward  
81 competitors (Sturgis & Gordon, 2012). Nestmate recognition relies on the detection of colony-specific  
82 chemosensory cues. These are mostly long chain hydrocarbons found on the outer surface of  
83 developing and adult individuals. The hydrocarbons can be linear and saturated (*n*-alkanes),  
84 unsaturated (alkenes), or contain methyl groups (methyl-branched alkanes) (van Zweden et al., 2010;  
85 van Zweden & d'Ettoire, 2010). The blend of hydrocarbons displayed by each individual is the result of  
86 both genetic (*e.g.*, van Zweden et al., 2010) and environmental factors (*e.g.*, Liang & Silverman, 2000).  
87 Cuticular cues homogenise between members of the colony through mutual grooming, food sharing  
88 (trophallaxis), inter-individual contacts or contact with the nest-material (Lenoir et al., 2009; van

89 Zweden et al., 2010). Consequently, members of the same colony, which are typically closely related  
90 and live in the same environment, share similar cuticular chemical profiles.

91 The interest in brood nestmate recognition behaviour in ant colonies led to, at least, 40 studies  
92 in 33 ant species (brood recognition has been recently reviewed in Schultner & Pulliainen, 2020).  
93 However, these studies focused mostly on mid to late-stage larvae. Hydrocarbons displayed on ant  
94 eggs have been studied in few genera (d’Ettorre et al., 2004; Endler et al., 2004; Helanterä & d’Ettorre,  
95 2015; Holman et al., 2010; Ruel et al., 2013; Tannure-Nascimento et al., 2009; van Zweden et al., 2009).  
96 To our knowledge, a colony-level signature of the surface hydrocarbons of the eggs has been  
97 convincingly found in two genera, belonging to the Ponerinae and the Formicinae (Helanterä &  
98 d’Ettorre, 2015; Tannure-Nascimento et al., 2009). Therefore, further studying the chemical signatures  
99 on eggs is necessary to better understand if and how they can be recognised as nestmate brood.

100 Brood can acquire the hydrocarbon signature through various mechanisms. The source of  
101 colony-level cues on brood is better known in eggs than in larvae. Freshly deposited eggs already bear  
102 the colony signature (Helanterä & d’Ettorre, 2015). Mothers appear to deposit hydrocarbons on eggs  
103 while they are maturing in their ovaries (Endler et al., 2004). Once laid, the surface hydrocarbons of  
104 the eggs could be influenced by contact with workers and allo-grooming (Schultner et al., 2017; van  
105 Zweden et al., 2010). However, the effect of contact alone is probably not a rapid process (d’Ettorre et  
106 al., 2006), and thus it might not be impactful, given the short duration of the early brood stages (a few  
107 days). It is possible that embryos produce hydrocarbons that might traverse the chorion through pores  
108 and modify the egg surface hydrocarbons (Juárez & Fernández, 2007).

109 Surface hydrocarbons and nestmate recognition of early stage larvae remains critically  
110 understudied. When larvae hatch from their egg, it is unclear if the egg surface hydrocarbons are  
111 transferred to the larvae or if freshly hatched larvae shall *de novo* synthesize their surface  
112 hydrocarbons (Howard & Blomquist, 2004). In the ant *Aphaenogaster senilis*, the amount of surface  
113 hydrocarbons on larvae is smaller compared to eggs and workers (Villalta et al., 2016). It is likely that

114 most of the hydrocarbons on the surface of eggs are not transferred to the larvae. As such, whether  
115 first instar larvae display enough cues to be recognised as nestmates remains an open question.

116 In this study, we aimed at filling the gap in our knowledge of nestmate recognition of early  
117 brood stages in ants. We investigated the colony-level signature of surface hydrocarbons of eggs and  
118 first instar (L1) larvae from six species belonging to three different subfamilies: Myrmicinae,  
119 Formicinae and Dolichoderinae. To assess how selective workers are when adopting brood, we studied  
120 brood-oriented behaviour of workers facing eggs and L1 larvae originating from their colony  
121 (nestmate), from another homo-specific colony (non-nestmate) or from another species (hetero-  
122 specific).

## 123 **Material and methods**

### 124 **Ant colonies collection and rearing**

125 We used colonies of six ant species: *A. senilis* (Formicidae, Myrmicinae), *Camponotus aethiops*  
126 (Formicidae, Formicinae), *Formica fusca* (Formicidae, Formicinae), *L. niger* (Formicidae, Formicinae),  
127 *Messor barbarus* (Formicidae, Myrmicinae) and *Tapinoma darioi* (Formicidae, Dolichoderinae). The  
128 geographic distribution of all species pairs studied here, for instance *L. niger* and *F. fusca*, are partially  
129 overlapping (see <https://antarea.fr/>). We observed that some of the colonies of *A. senilis* collected  
130 lived with neighbouring *M. barbarus* colonies. The same for *F. fusca* colonies and *L. niger* colonies.

131 The *T. darioi* colonies were collected in October 2018 and February 2020 in the region of  
132 Argelès-sur-mer (France). The *A. senilis* colonies were collected around Argelès-sur-mer (France) in  
133 October 2018 and in the Doñana National Park (Spain) in March 2019. The *C. aethiops* colonies were  
134 collected in 2014 and 2016 around Toulouse (France). *L. niger* colonies originated from founding  
135 queens collected in 2018 in the region of Paris (France). *M. barbarus* colonies originated from founding  
136 queens collected in October 2017 in Saint Gilles (France). *F. fusca* colonies were collected in 2017 and  
137 2019 in the Ermenonville forest (France). All ants were housed in artificial nests with plaster floor  
138 placed in a larger plastic box constituting the foraging arena. Colonies were kept under controlled  
139 laboratory conditions (25±2°C, 50±10% relative humidity, 12 h/12 h: day/night) and fed twice a week  
140 with dead crickets and a mixture of honey and apples. Water was provided *ad libitum*. Behavioural  
141 experiments were performed in 2019 and 2020. All experiments were performed after at least 1 month  
142 of laboratory rearing.

143

### 144 **Chemical analyses**

145 Chemical analyses were performed in 2019 and 2020. Ant colonies were reared at least 3  
146 months in laboratory conditions before the chemical analyses. We collected live eggs and larvae from  
147 nest-boxes of the six ant species. To obtain L1 larvae, we selected those of a size comparable to an egg

148 that we found among egg piles. Despite the similar size between L1 larvae when they are folded on  
149 themselves and eggs, which is consistent with L1 larvae having hatched from an egg a few hours earlier,  
150 L1 larvae appear longer than egg but less large.

151 The number of eggs and larvae collected for chemical analyses is shown in Table S1. We  
152 collected at least three eggs and first instar (L1) larvae from at least three different colonies for each  
153 of the six species. Eggs and larvae were put individually into glass vial with a 200- $\mu$ L glass insert  
154 (Supelco, Sigma-Aldrich) and immediately frozen. Surface chemicals extraction and analysis were  
155 performed within 6 months. Surface hydrocarbons were extracted from individual eggs and larvae  
156 using 10 $\mu$ L of n-pentane ( $\geq$ 99%, HPLC grade, Sigma-Aldrich) for 2 minutes. We then injected 3  $\mu$ L of the  
157 extract into an Agilent 7890A gas chromatograph (GC), equipped with an HP-5MS capillary column (30  
158 m x 0.25 mm x 0.25  $\mu$ m) and a split-splitless injector, coupled to an Agilent 5975C mass spectrometer  
159 (MS) with 70 eV electron impact ionization. The carrier gas was helium at 1 mL.min<sup>-1</sup>. The temperature  
160 program was as follows: an initial hold at 70°C for 1 min, then 70-180°C at 30°C.min<sup>-1</sup>, then 180-300°C  
161 at 3°C.min<sup>-1</sup>, then 300-320°C at 20°C.min<sup>-1</sup> then hold at 320°C for 3 min.

162 In order to assess the variations in the total amount of cuticular hydrocarbons between eggs  
163 and L1 larvae across species, we extracted additional samples from some of the species studied,  
164 depending on availability at the time of this experiment. The samples were collected and analysed by  
165 GC-MS as above except we added an internal standard in the solvent (pentane) used for the extraction  
166 (*n*-C<sub>20</sub> at 0,25ng/ $\mu$ L). The quantity of the surface hydrocarbons in the samples could then be estimated  
167 based on the area of this internal standard peak.

168

## 169 **Behavioural experiments**

170 The aim was to test the behaviour of workers when facing nestmate, homo-specific non-  
171 nestmate or hetero-specific eggs or first instar larvae. The same protocol was followed for eggs and L1  
172 larvae trials, which were performed independently. Overall, for the behavioural experiments, eggs and  
173 L1 larvae and workers originated from twelve *A. senilis* colonies, ten *C. aethiops*, *L. niger* and *M.*



174 *barbarus* colonies and six *T. darioi* and *F. fusca* colonies. We prepared groups of six nestmate workers:  
175 three from outside the nest and three from inside the nest. This choice aimed at representing the  
176 diversity of age and role among workers in a colony, as workers found outside the nest tend to be older  
177 as well as foragers and workers from inside the nest tend to be younger and nurses. The ants were  
178 placed in an eight cm arena with a filter paper as floor and with walls coated with Fluon® (AGC  
179 Chemicals Europe, Thornton-Cleveleys, United Kingdom). Each group was given a refuge made of a  
180 red-coated 1.5mL Eppendorf tube (that had spent at least twenty-four hours in the nest box of the  
181 original colony), three late-instar larvae from their own colony, food (mixture of honey and apple) and  
182 water. After minimum time of twenty-six hours of acclimation, and if the workers had brought the late-  
183 instar larvae into the refuge, we removed food and water and started the behavioural trials. Groups  
184 that did not bring larvae into the refuge were discarded.

185         Shortly before the trials, we collected eggs or L1 larvae from the colony of origin of each group  
186 of tested workers (nestmate), from another colony of the same species (non-nestmate) or from  
187 another species (hetero-specific). For hetero-specific brood, we used brood from species of the same  
188 subfamily when possible to reduce the impact of the phylogenetic distance in recognition. We also  
189 choose brood from species of a similar size to reduce the impact of this cue in recognition. For *A. senilis*,  
190 we used *M. barbarus* brood and *vice versa*. For *C. aethiops* and *L. niger*, we used *F. fusca* brood. For *T.*  
191 *darioi*, we used *L. niger* brood. For each trial, three brood items were deposited in a line (figure A1).  
192 All three of these were either nestmate, or non-nestmate or hetero-specific relative to the workers.  
193 The behaviour of the workers towards the brood items was video recorded with an FDR-AX33 Sony  
194 camera for fifteen minutes. After fifteen additional minutes, any brood that had not been brought  
195 inside the refuge were removed from the arena. Thirty minutes later, another set of three brood items  
196 with a different origin were presented to the same group of workers. Each group of workers received  
197 nine brood items in total (all the three possible origins) in three different trials, in each trial the brood  
198 had the same origin. The different order of presentation of the three types of brood items were tested  
199 in an equilibrated manner between groups to prevent any bias. That is some groups received nestmate

200 then non-nestmate then hetero-specific brood and an equivalent number of groups received nestmate  
201 then hetero-specific then non-nestmate, *etc.*).

202           The behaviour of the workers was scored for the first 15 minutes after the first brood item was  
203 deposited using the software Boris v7.9.15 (Friard & Gamba, 2016). We noted the times where workers  
204 started and stopped to antennate a brood item and the times when a worker entered the refuge with  
205 a transported brood item. The occurrences of aggressive behaviours (e.g., workers opening their  
206 mandibles, thus showing threat behaviour) towards homo-specific non-nestmate brood were very rare  
207 therefore we did not analyse such behaviours. Trials for which the workers did not touched or  
208 interacted with the brood items were discarded from further analysis as workers were considered  
209 inactive. Full details on the colonies and the number of groups used for each colony are displayed in  
210 supplementary table S1. For eggs, we used 36 groups from 6 *A. senilis* colonies; 39 groups from 4 *C.*  
211 *aethiops* colonies; 52 groups from 7 *L. niger* colonies; 36 groups from 6 *M. barbarus* colonies and 36  
212 groups from 3 *T. darioi* colonies. For L1 larvae, we used 31 groups from 6 *A. senilis* colonies; 32 groups  
213 from 6 *C. aethiops* colonies; 40 groups from 7 *L. niger* colonies; 36 groups from 8 *M. barbarus* colonies  
214 and 32 groups from 3 *T. darioi* colonies. All experiments and scoring were performed by A. de Fouchier,  
215 except for *A. senilis* and *C. aethiops* L1 larvae experiments and for the scoring of *M. barbarus* eggs  
216 experiments that were performed under A. de Fouchier close supervision by two Master students.

217

## 218 **Data and statistical analyses**

219           Data was analysed using R Studio (v1.3.1093, RStudio Team, 2015) and R software (v4.0.0, R  
220 Core Team, 2020). Data and code used for the analysis performed have been deposited on FigShare  
221 (doi: 10.6084/m9.figshare.14303078 and 10.6084/m9.figshare.14304167).

## 222 ***Chemical data***

223           For each colony and species, we analysed between three and four samples (supplementary  
224 table S1). Hydrocarbons were identified by their mass spectra and retention times. Their areas were

225 integrated using MSD ChemStation (vE.02.01.1177, Agilent Technologies Inc., CA), this was performed  
226 by A. de Fouchier.

227         The area of each peak was normalised to the sum of the area of all peaks in a given sample. To  
228 assess the variability of the chemical profiles across species and sample types, we performed a non-  
229 metric multidimensional scaling on the normalised areas of the peaks observed in all samples. This  
230 scaling was performed with three dimensions to give a good representation of the raw data (stress  
231 inferior at 0.1) and with 100 iteration maximum using the *metaMDS* function from the *vegan* package  
232 (v2.5-7).

233         For further analysis, we selected peaks that were present in all the samples of the same  
234 species. For the egg samples, the number of peaks was 18 for *A. senilis*, 28 for *C. aethiops*, 23 for *F.*  
235 *fusca*, 21 for *L. niger*, 16 for *M. barbarus* and 22 for *T. darioi*. For the L1 larvae samples, the number of  
236 peaks was 8 for *A. senilis*, 9 for *C. aethiops*, 5 for *F. fusca*, 5 for *L. niger*, 7 for *M. barbarus* and 6 for *T.*  
237 *darioi*.

238         We then did a principal component analysis (PCA) for each species using the *PCA* function  
239 (*FactoMineR* package, v2.0; Lê et al., 2008) and kept enough components to describe at least 95% of  
240 the total variance. We selected as subset of components an F-score, relative to the colony of origin,  
241 superior or equal to 0.01. The F-scores were computed with the function *fscore* (*PredPsych* package  
242 v0.4, Koul et al., 2018). Using those selected components, we computed linear discriminant analysis  
243 using the *LinearDA* function for each species and brood types separately using the colony of origin as  
244 classification variable with a leave-one sample out cross-validation (*PredPsych* package v0.4). To test  
245 the significance of the accuracy of classification obtained, we used permutation tests with 5000  
246 simulations using the *ClassPerm* function (*PredPsych* package v0.4). This tests if the classification is  
247 more accurate than would be a random classification. This analysis was replicated using a different  
248 method to reduce complexity of the original dataset. We used dimensions from a non-metric  
249 multidimensional scaling on the normalised area of the peaks observed in all samples from the same

250 species and sample type. This scaling was performed with the same tool as above but with enough  
251 dimensions to obtain a stress inferior at 0.05.

252 To assess the variability of the difference between nestmate and non-nestmate chemical  
253 signatures across species, we used the same datasets to compute intra and inter-colony Euclidean  
254 distance between nestmates and non-nestmates using the global centroid method (van Zweden et al.,  
255 2014). That is intra-colony distances are measured between each individual sample profiles and the  
256 mean profile of the colony. The inter-colony distances are measured between individual sample  
257 profiles and the mean profile of the samples from both the colony of origin of the individual sample  
258 under scrutiny and another colony. This allows to consider the variability between nestmate when  
259 measuring the distances with non-nestmates. In order to assess the variation of intra-colony distances  
260 between species, we computed the ratio between intra and inter-colony distances. That is, we  
261 normalised the intra-colony distances measures for each individual by dividing them by each inter-  
262 colony distances measured for the same individual. To assess the variation of intra-colony distances  
263 between species, we computed the ratio between intra and inter-colony distances. We then  
264 performed type II ANOVA, using the *Anova* function (*car* package, v3.0-7), on linear mixed-effects  
265 models (LMM), using the *lmer* function (*lme4* package, v1.1-23). The models were computed to test  
266 for the effect of the species of origin of the samples on a base 10 logarithmic transformation of the  
267 ratios of the intra and inter-colony chemical distances. Sample ID and colony of origin were used as  
268 nested random factors. The colony used for the inter-colony distance was a random factor as well. *P*  
269 values were adjusted for multiple comparisons across species for each type of brood using Holm's  
270 method using the *p.adjust* function (package stats v4.0.0).

271

## 272 ***Behavioural data***

273 We tested whether the source of the brood item had an effect on two different variables: 1)  
274 the number brood items brought into the refuge in each trial; 2) the total time workers spent  
275 antennating the brood items. The percentage of brood items brought to refuge was analysed using

276 generalized linear mixed-effect models (GLMM) for proportional data with a binomial function with a  
277 logit link using the *glmer* function (package *lme4* v1.1-21). For the cumulative duration of antennation,  
278 we used LMMs using the *lmer* function (package *lme4* v1.1-21). The colony of origin of the workers,  
279 their group identity, the origin and the order of the brood encountered during the three trials were  
280 used as random factors for both types of models. Post hoc differences were tested with type II ANOVAs  
281 as above. *P* values were adjusted for multiple comparisons as above.

282

### 283 **Ethical Note**

284 No licences or permits are needed for experiments on ants in France. We used 2220 adult  
285 worker ants for our behavioural experiments. We used 69 eggs and 74 L1 larvae for our chemical  
286 analyses. To minimise stress induced by rearing conditions, we used artificial nests with suiting  
287 humidity and foraging areas. Colonies were kept at optimal temperature and provided with sufficient  
288 food and water. No adult ants were disposed of during or after the experiment. Colonies for which the  
289 queen died after the experiments were disposed of by putting them at -20°C for at least 24h. Eggs and  
290 L1 larvae were sacrificed in a similar manner before solvent chemical extraction. No potentially harmful  
291 or painful manipulations of live animals were performed. No invasive samples were taken from live  
292 animals.

## 293 Results

### 294 Brood surface hydrocarbons

295 A non-metric multidimensional scaling ordination of the chemical profiles observed across  
296 samples, from all species and both types of brood, reveals that there is a clear difference between the  
297 profiles of all these categories (figure 1). This inter-specific and between brood type difference can be  
298 observed in the qualitative and quantitative variations of the hydrocarbons found in the chemical  
299 extracts (figure A2, table S2). In the extracts of egg surface compounds, we could observe between 21  
300 (*A. senilis* and *L. niger*) and 31 (*C. aethiops*) peaks containing hydrocarbons that were consistently  
301 present in samples of the same species (figure A2, table S2). Profiles of eggs appear to contain a higher  
302 diversity of methyl-alkanes compared to linear alkanes. In *T. darioi*, *L. niger* and *F. fusca* egg samples,  
303 we also observed a small number of alkenes. The chemical profile of L1 larvae appears to have a lower  
304 total amount of hydrocarbons compared to eggs (figure A3) as well as a smaller diversity of compounds  
305 (figure A2, table S2). We found between 5 (in *L. niger* and *F. fusca*) and 9 (in *C. aethiops*) peaks  
306 containing hydrocarbons with a majority of linear alkanes and a lower number of methyl-alkanes in  
307 almost all species. In *M. barbarus*, both families of compounds were present in similar numbers (table  
308 S2). We did not observe any alkenes among the surface hydrocarbons extracted from larvae. The most  
309 common compounds were *n*-C<sub>23</sub>, *n*-C<sub>25</sub> and *n*-C<sub>27</sub> (peaks 4, 21 and 45), which are present across all  
310 species in surface profiles of both eggs and larvae (figure 1, table S2). The alkane *n*-C<sub>28</sub> (peaks 59) was  
311 found in all egg samples. In almost all cases, compounds found in L1 larvae extracts were also present  
312 in eggs extracts (figure A2, table S2). The exceptions are *n*-C<sub>21</sub> (peak 1), found on *A. senilis* and *L. niger*  
313 larvae only, and a diMeC<sub>24</sub> (peak 15) found on *A. senilis* larvae but not eggs.

314 Principal component analyses indicate that there is a colony-specificity of surface  
315 hydrocarbons blends (figure A4, table A1). Using linear discriminant analyses, we observed that  
316 chemical profiles allowed the prediction of the colony of origin of the egg samples significantly better  
317 than by chance (permutation test,  $P \leq 0.05$ , figure 2.a, Koul et al., 2018; Ojala & Garriga, 2010). The  
318 accuracy of prediction of the colony of origin was 100% for *L. niger*, *C. aethiops*, *F. fusca* and *M.*

319 *barbarus* eggs. For *T. darioi* and *A. senilis* eggs, the prediction of the colony of origins was not totally  
320 accurate (88.89% and 93.33% respectively). In larvae samples, the hydrocarbon profiles allowed the  
321 identification of the colony of origin in *L. niger*, *C. aethiops*, *F. fusca* and *M. barbarus* (permutation test,  
322  $P \leq 0.05$ , figure 2.a). However, unlike for egg samples, the accuracy of prediction of the colony of origin  
323 was 100% only for *C. aethiops* and *F. fusca*. Regarding *M. barbarus* and *L. niger* L1 larvae, the  
324 predictions were imperfect (50.00% and 58.33% respectively). For *T. darioi* and *A. senilis* L1 samples,  
325 the prediction of the colony of origin was inaccurate (33.34% and 25.00% respectively) and not  
326 different from random (permutation test,  $P > 0.05$ , figure 2.a). Replication of this analysis with an  
327 NMDS ordination gave similar results, although PCA ordination appears to perform better (table A2).

328 To compare the difference between colony hydrocarbon profiles across species, we  
329 normalized the nestmate chemical distances relative to the non-nestmate distances in each species  
330 (figure 2.b). The difference in colony signatures are similar for larvae and for eggs in most species.  
331 However, in *L. niger* and *F. fusca* eggs, the differences in colony signatures are larger compared to *T.*  
332 *darioi*, *C. aethiops* and *M. barbarus* nestmate to non-nestmate distances (LMM,  $P \leq 0.05$ , Type II  
333 ANOVA; table A3). Consistently with our analysis of the existence of a colony signature in the chemical  
334 profiles of eggs, the large majority of ratios between nestmate and non-nestmate eggs chemical  
335 distances are inferior to one (*i.e.* distance between nestmates is smaller than between non-  
336 nestmates). For larvae, cases of ratios superior to one (*i.e.* distance between nestmates is greater than  
337 between non-nestmates) appear more frequently, which is consistent with our observations that  
338 colony signatures are less clear for L1 larvae.

339

#### 340 **Brood discrimination by ant workers**

341 From the results of our chemical analyses, we would predict that ant workers are able to  
342 discriminate between homo-specific and hetero-specific brood. The discrimination between nestmate  
343 and non-nestmate would be possible for eggs but more difficult for L1 larvae, especially in *A. senilis*

344 and *T. darioi*. Using behavioural assays, we measured the number of brood items retrieved by workers  
345 (figure 3.a) as well as the time they spent antennating the brood (figure 3.b).

346 For *T. darioi*, nestmate eggs were retrieved significantly more frequently compared to hetero-  
347 specific items (GLMM,  $P \leq 0.05$ , Type II ANOVA; table A4). We observed no differences in the number  
348 of non-nestmate and hetero-specific eggs retrieved by *T. darioi* workers. *L. niger* workers brought  
349 significantly more nestmate eggs into the refuge compared to non-nestmate and hetero-specific eggs  
350 (GLMM,  $P \leq 0.05$ , Type II ANOVA; table A4). The number of non-nestmate eggs retrieved by *L. niger*  
351 workers was higher than the number of hetero-specific ones. The results for *A. senilis*, *C. aethiops*, *L.*  
352 *niger* and *M. barbarus* assays were similar: workers transported significantly more nestmate and non-  
353 nestmate eggs than hetero-specific ones into the refuge (GLMM,  $P \leq 0.05$ , Type II ANOVA; Table A4).  
354 There was no significant difference between the number of nestmate and non-nestmate eggs retrieved  
355 by workers.

356 Regarding L1 larvae, *T. darioi* workers retrieved significantly more nestmate L1 larvae than  
357 non-nestmate and hetero-specific ones. In fact, *T. darioi* workers retrieved almost no non-nestmate or  
358 hetero-specific larvae. Consequently, there were no differences in the number of non-nestmate and  
359 hetero-specific larvae retrieved by *T. darioi* workers. Observations for *L. niger*, *A. senilis*, *C. aethiops*,  
360 and *M. barbarus* L1 larvae trials were similar between each other. The number of nestmate and non-  
361 nestmate L1 larvae transported into the refuge by workers were similar and significantly higher than  
362 the number of hetero-specific L1 larvae. Overall, the results of the behavioural assays show that ant  
363 workers are able to discriminate between homo-specific and hetero-specific eggs and L1 larvae.  
364 Furthermore, we observed that *L. niger* and *T. darioi* discriminate between nestmate and non-  
365 nestmate eggs and only *T. darioi* workers discriminate between nestmate and non-nestmate L1 larvae.

366 Antennation allows ants to use their chemical and mechanical sensors to explore items. A  
367 longer antennation time is a sign of a higher interest or more complex identification of the item. *A.*  
368 *senilis* and *M. barbarus* workers spent significantly more time antennating nestmate and non-  
369 nestmate eggs compared to hetero-specific eggs (LMM,  $P \leq 0.05$ , Type II ANOVA; table A5). *L. niger*



370 workers antennated for a significantly longer time nestmate and non-nestmate L1 larvae when  
371 compared to hetero-specific ones (LMM,  $P \leq 0.05$ , Type II ANOVA; table A5). For *C. aethiops*,  
372 antennation times were significantly shorter when comparing nestmate to non-nestmate and hetero-  
373 specific L1 larvae (LMM,  $P \leq 0.05$ , Type II ANOVA; table A5). Finally, *A. senilis* workers spent less time  
374 antennating nestmate and hetero-specific L1 larvae compared to non-nestmate larvae (LMM,  $P \leq 0.05$ ,  
375 Type II ANOVA; table A5).

376 Overall, our behavioural trials show that ant workers discriminate between brood items from  
377 their colony and hetero-specific ones. However, discrimination between nestmate and homo-specific  
378 non-nestmate brood is clearly evident only in *L. niger* and *T. darioi*.

## 379 Discussion

380 Our chemical analyses and behavioural experiments allow a better understanding of species  
381 and colony-level chemical cues in the early brood stages of derived ant species as well as the  
382 discriminatory behaviour that could depend on those cues. The number of chemical cues observed is  
383 smaller in first instar larvae compared to eggs in all species studied. It seems to be the case for the  
384 diversity of surface hydrocarbons. However, we can't rule out that our method of analysis, for which  
385 quantity of hydrocarbons appears limiting, was not sensitive enough to detect the full diversity  
386 hydrocarbons on larvae's surface. Nevertheless, the difference in surface hydrocarbon quantity  
387 supports the hypothesis that when larvae hatch from the egg the hydrocarbons are not transferred  
388 from the egg's chorion to the larval cuticle, or at least they are in very minute amounts. If so, L1 larvae  
389 would have to synthesize *de novo* their surface hydrocarbons. Transfer of hydrocarbon from workers  
390 might also be a way for larva to acquire the colony signature.

391 The hydrocarbons observed on the surface of eggs and L1 larvae are of a similar nature to  
392 those found in adults that were detected across a wide range of Hymenoptera species (Provost et al.,  
393 1994; van Zweden & d'Ettorre, 2010). As such, they should be detected by the sensory systems of  
394 most, if not all, ant species (Sharma et al., 2015). Our chemical analysis clearly showed that the surface  
395 hydrocarbons of eggs and L1 larvae are different among species. These inter-specific differences are  
396 consistent with our observation that ant workers discriminate both eggs and larvae of their species  
397 from brood of a different species in all our behavioural trials. This is also consistent with what has been  
398 observed for eggs in some *Formica* species (Chernenko et al., 2011; Schultner & Pulliainen, 2020).

399 Are ants able to recognize the colony of origin of conspecific eggs? We observed colony-  
400 specific blend of hydrocarbons on eggs, suggesting that the display of colony cues on eggs is a trait  
401 present across the three ant subfamilies we studied, which derived more than a 100 million years ago  
402 (Moreau et al., 2006). This is consistent with observations in seven *Formica* species (Helanterä &  
403 d'Ettorre, 2015). Despite the presence of colony-specific cues, only *T. darioi* and *L. niger* workers  
404 discriminated against non-nestmate eggs in our behavioural trials. Data from the literature show that

405 *F. fusca* workers and larvae discriminate against non-nestmate eggs (Helanterä & Sundström, 2007;  
406 Pulliainen et al., 2019). Interestingly, our results showed that discrimination against non-nestmate  
407 eggs is not consistently correlated with larger differences between nestmate and non-nestmate odours.  
408 This indicates that non-nestmate discrimination could also rely on a more accurate recognition by  
409 workers of the cues displayed on the brood or on variation in the acceptance threshold of workers.

410 Can workers recognize nestmate first instar larvae? Our chemical analysis and behavioural  
411 trials with L1 larvae draw a less clear picture than for eggs. Data in the literature are also scant. Larvae  
412 from both Formicinae species we studied (*L. niger* and *C. aethiops*) and those from *M. barbarus*  
413 (Myrmicinae) display a colony-specific chemical signature. However, these signatures did not allow for  
414 reliable identification of the colony of origin by our analytical tools in two species (*M. barbarus* and *L.*  
415 *niger*). We could not demonstrate the presence of a colony signature in the surface hydrocarbons of  
416 *T. darioi* (Dolichoderinae) and *A. senilis* (Myrmicinae) larvae. Surprisingly, *T. darioi* workers were the  
417 only ones able to discriminate between nestmate and non-nestmate larvae, which indicates that *T.*  
418 *darioi* larvae display enough cues for colony-level recognition. This means that *T. darioi* workers either  
419 use chemical cues that our method of analysis could not detect or use non-chemical cues. However,  
420 to our knowledge, the literature does not support the hypothesis that workers use non-chemical cues  
421 (e.g. visual or auditory) for nestmate larvae recognition (Schultner & Pulliainen, 2020). As such, the  
422 hypothesis that *T. darioi* first instar larvae display a colony specific odour remains the most plausible.

423 Our experimental setup required compromises to allow testing multiple species in a  
424 comparable way. Trials were performed on small groups of individuals compared to the size of ant  
425 colonies in nature. However, we used refuges that were previously stored in the colony of origin to  
426 allow these refuges to bear the colony's odour. We also made sure that ant groups were accepting the  
427 refuge as a suitable brood storage by selecting groups that displayed a brood retrieval behaviour  
428 during the acclimation stage. The worker groups we used could be considered as recently queen-less.  
429 Nevertheless, the workers should be able to sense the queen presence from the three pieces of brood

430 they had in their refuge. As such, we are confident that the behaviour of the workers in our set-up was  
431 not altered in a way that would impair our conclusion.

432         We observed *A. senilis* and *C. aethiops* workers behaving differently when facing nestmate  
433 larvae compared to non-nestmate larvae (*i.e.* different antennation durations). Is this an indication  
434 that they are able to recognize nestmate L1 larvae from non-nestmate larvae? On *C. aethiops* L1 larvae,  
435 we could detect a colony-level chemical signature. We could not reliably do so on *A. senilis* first instar  
436 larvae, but neither could we on *T. darioi* larvae despite the clear behavioural evidences that they do  
437 display a colony signature. Given the lower overall quantity of surface hydrocarbons on L1 larvae  
438 compared to eggs, the chemical cues displayed might challenge the olfactory detection system of ant  
439 workers and the presence of non-nestmate cues might appear ambiguous to them. The long  
440 antennation time observed would then be a sign of the ant's difficulty to recognize the signature.  
441 Similar hesitation has been observed for recognition of ambiguous colony cues on adults (Nascimento  
442 et al., 2013).

443         Taken together, our observations allow us to confidently state that workers recognize and  
444 favour nestmate first instar larvae only for *T. darioi*. In the other species, discrimination is clear only  
445 towards hetero-specific larvae. Discrimination against non-nestmate eggs, doesn't implies favouring  
446 nestmate first instar larvae. These differences across stages in non-nestmate discrimination probably  
447 arose from the differences in the quality and the diversity of the chemical cues displayed as the surface  
448 of the brood. Unlike eggs, larvae likely have to synthesize the chemical cues they display from the first  
449 day after emergence. It is also possible that the difference in discriminatory behaviour of *L. niger*  
450 towards eggs and L1 larvae are linked to a risk-reward trade-off between these two brood stages. L1  
451 larvae need a shorter time, hence less resources, to become adult workers compared to eggs.

452         Our observations and those from the literature support the hypothesis that egg surface  
453 hydrocarbons display sufficient information for ant workers to discriminate nestmate from non-  
454 nestmate eggs across the most derived clades of the ants' phylogenetic tree. The predominance of  
455 non-nestmate eggs discrimination in the majority of the ant species studied calls for further work, on

456 additional ant species, to test evolutionary hypotheses on conspecific non-nestmates discrimination in  
457 ants.

458         The three ant species that efficiently discriminate against non-nestmate eggs belong to genera  
459 prone to social parasitism. Indeed, *L. niger* is host to various social parasites from the *Lasius* genus  
460 (Buschinger, 2009) and the *Tapinoma* genus is known to be subject to parasitism by *Bothriomyrmex*  
461 species (Buschinger, 2009; Lenoir et al., 2001). Furthermore, host species of the *Formica* genus also  
462 discriminate against non-nestmate eggs (Chernenko et al., 2011). Our results, and those from the  
463 literature, are thus in accordance with the hypothesis that the arms race between social parasites and  
464 host species led workers from host species to set an adaptatively less permissive acceptance threshold  
465 regarding divergence from the colony signature on brood, thus discriminating against non-nestmates  
466 (Pulliainen et al., 2019). The parasites trying to get themselves recognized as nestmates induce a more  
467 strict discrimination of eggs as a species level adaptation in hosts (Grüter et al., 2018).

468         Discrimination can lead to costly errors (Reeve, 1989; Rossi et al., 2018). Accordingly, the three  
469 species we studied, which are not subject to an arms race with social parasites, do not discriminate  
470 against non-nestmate brood. Brood adoption appears less risky in those non-host species while  
471 recognition errors (discarding of nestmate brood) represent a potential loss to the colony's fitness.  
472 This would explain the reduction or disappearance of the discriminatory behaviour against non-  
473 nestmate eggs. Identification of first instar larvae, which do not display as many chemical cues as eggs,  
474 appears a more challenging task, which prevents a stricter non-nestmate discrimination in most  
475 species, even parasitized ones. Overall, our results are in accordance with the hypothesis that  
476 differences in selective pressures induced by social parasites are linked with differences in the  
477 discrimination against non-nestmate eggs in the context of brood retrieval between host and non-host  
478 species.

479         Given the relative artificial nature of our experimental set-up, we can however not rule out  
480 that the recently queen-less workers would be overall more prone to retrieve brood. As such, our  
481 experimental set-up would then have induced a higher non-nestmate brood retrieval, without masking

482 the difference in behaviour between host and non-host species. As observed here in the case non-host  
483 ant species, there are other species of ants and social insects in general, that do not discriminate  
484 against non-nestmates, or non-kin, even though theory would predict them to do so (Blatrix & Jaisson,  
485 2002; de Gasperin et al., 2021; Friend & Bourke, 2012; Helanterä et al., 2007; Kikuchi et al., 2007; Mora-  
486 Kepfer, 2014). Outside social insects, bird or mammals can either be kin-discriminative or not in their  
487 altruistic behaviour depending on the species. A possible explanation is the fact that group members  
488 are usually highly related and errors cost more than providing resources to less related offspring  
489 (Duncan et al., 2019). Overall, this suggests that discrimination strategies often result from trade-offs  
490 and depends on organisms' life-history and ecology.

## 491 **References**

- 492 Blatrix, R., & Jaisson, P. (2002). Absence of kin discrimination in a ponerine ant. *Animal Behaviour*,  
493 *64*(2), 261–268. <https://doi.org/10.1006/anbe.2002.3048>
- 494 Bos, N., & d’Ettorre, P. (2012). Recognition of Social Identity in Ants. *Frontiers in Psychology*, *3*.  
495 <https://doi.org/10.3389/fpsyg.2012.00083>
- 496 Buschinger, A. (2009). Social parasitism among ants: A review (Hymenoptera: Formicidae).  
497 *Myrmecological News*, *12*, 219–235.
- 498 Chernenko, A., Helanterä, H., & Sundström, L. (2011). Egg Recognition and Social Parasitism in *Formica*  
499 *Ants*. *Ethology*, *117*(12), 1081–1092. <https://doi.org/10.1111/j.1439-0310.2011.01972.x>
- 500 d’Ettorre, P. (2020). Kin Recognition. In C. K. Starr (Ed.), *Encyclopedia of Social Insects* (pp. 1–4).  
501 Springer International Publishing. [https://doi.org/10.1007/978-3-319-90306-4\\_185-1](https://doi.org/10.1007/978-3-319-90306-4_185-1)
- 502 d’Ettorre, P., Heinze, J., & Ratnieks, F. L. W. (2004). Worker policing by egg eating in the ponerine ant  
503 *Pachycondyla inversa*. *Proceedings of the Royal Society of London. Series B: Biological Sciences*,  
504 *271*(1546), 1427–1434. <https://doi.org/10.1098/rspb.2004.2742>
- 505 d’Ettorre, P., Tofilski, A., Heinze, J., & Ratnieks, F. L. W. (2006). Non-transferable signals on ant queen  
506 eggs. *Naturwissenschaften*, *93*(3), 136–140. <https://doi.org/10.1007/s00114-005-0075-9>
- 507 de Gasperin, O., Blacher, P., & Chapuisat, M. (2021). Social insect colonies are more likely to accept  
508 unrelated queens when they come with workers. *Behavioral Ecology*, *32*(5), 1004–1011.  
509 <https://doi.org/10.1093/beheco/arab047>
- 510 Duncan, C., Gaynor, D., Clutton-Brock, T., & Dyble, M. (2019). The Evolution of Indiscriminate Altruism  
511 in a Cooperatively Breeding Mammal. *The American Naturalist*, *193*(6), 841–851.  
512 <https://doi.org/10.1086/703113>
- 513 Endler, A., Liebig, J., Schmitt, T., Parker, J. E., Jones, G. R., Schreier, P., & Hölldobler, B. (2004). Surface  
514 hydrocarbons of queen eggs regulate worker reproduction in a social insect. *Proceedings of*  
515 *the National Academy of Sciences of the United States of America*, *101*(9), 2945–2950.  
516 <https://doi.org/10.1073/pnas.0308447101>

- 517 Fénéron, R., & Jaisson, P. (1995). Ontogeny of nestmate brood recognition in a primitive ant,  
518 *Ectatomma tuberculatum* Olivier (Ponerinae). *Animal Behaviour*, *50*(1), 9–14.  
519 <https://doi.org/10.1006/anbe.1995.0215>
- 520 Fletcher, D. J. C., & Ross, K. G. (1985). Regulation of Reproduction in Eusocial Hymenoptera. *Annual*  
521 *Review of Entomology*, *30*(1), 319–343.  
522 <https://doi.org/10.1146/annurev.en.30.010185.001535>
- 523 Fouks, B., d’Ettorre, P., & Nehring, V. (2011). Brood adoption in the leaf-cutting ant *Acromyrmex*  
524 *echinator*: Adaptation or recognition noise? *Insectes Sociaux*, *58*(4), 479–485.  
525 <https://doi.org/10.1007/s00040-011-0167-9>
- 526 Friard, O., & Gamba, M. (2016). BORIS: A free, versatile open-source event-logging software for  
527 video/audio coding and live observations. *Methods in Ecology and Evolution*, *7*(11), 1325–  
528 1330. <https://doi.org/10.1111/2041-210X.12584>
- 529 Friend, L. A., & Bourke, A. F. G. (2012). Absence of Within-Colony Kin Discrimination in a Multiple-  
530 Queen Ant, *Leptothorax acervorum*. *Ethology*, *118*(12), 1182–1190.  
531 <https://doi.org/10.1111/eth.12024>
- 532 Grüter, C., Jongepier, E., & Foitzik, S. (2018). Insect societies fight back: The evolution of defensive  
533 traits against social parasites. *Philosophical Transactions of the Royal Society B: Biological*  
534 *Sciences*, *373*(1751), 20170200. <https://doi.org/10.1098/rstb.2017.0200>
- 535 Helanterä, H., & d’Ettorre, P. (2015). A comparative study of egg recognition signature mixtures in  
536 *Formica* ants. *Evolution*, *69*(2), 520–529. <https://doi.org/10.1111/evo.12590>
- 537 Helanterä, H., Martin, S. J., & Ratnieks, F. L. W. (2007). Prior experience with eggs laid by non-nestmate  
538 queens induces egg acceptance errors in ant workers. *Behavioral Ecology and Sociobiology*,  
539 *62*(2), 223–228. <https://doi.org/10.1007/s00265-007-0456-5>
- 540 Helanterä, H., & Sundström, L. (2007). Worker policing and nest mate recognition in the ant *Formica*  
541 *fusca*. *Behavioral Ecology and Sociobiology*, *61*(8), 1143–1149.  
542 <https://doi.org/10.1007/s00265-006-0327-5>



- 543 Holman, L., Jørgensen, C. G., Nielsen, J., & d’Ettorre, P. (2010). Identification of an ant queen  
544 pheromone regulating worker sterility. *Proceedings of the Royal Society B: Biological Sciences*,  
545 277(1701), 3793–3800. <https://doi.org/10.1098/rspb.2010.0984>
- 546 Howard, R. W., & Blomquist, G. J. (2004). Ecological, Behavioral, and Biochemical Aspects of Insect  
547 Hydrocarbons. *Annual Review of Entomology*, 50(1), 371–393.  
548 <https://doi.org/10.1146/annurev.ento.50.071803.130359>
- 549 Juárez, M. P., & Fernández, G. C. (2007). Cuticular hydrocarbons of triatomines. *Comparative*  
550 *Biochemistry and Physiology Part A: Molecular & Integrative Physiology*, 147(3), 711–730.  
551 <https://doi.org/10.1016/j.cbpa.2006.08.031>
- 552 Khila, A., & Abouheif, E. (2008). Reproductive constraint is a developmental mechanism that maintains  
553 social harmony in advanced ant societies. *Proceedings of the National Academy of Sciences*,  
554 105(46), 17884–17889. <https://doi.org/10.1073/pnas.0807351105>
- 555 Khila, A., & Abouheif, E. (2010). Evaluating the role of reproductive constraints in ant social evolution.  
556 *Philosophical Transactions of the Royal Society B: Biological Sciences*, 365(1540), 617–630.  
557 <https://doi.org/10.1098/rstb.2009.0257>
- 558 Kikuchi, T., Tsuji, K., Ohnishi, H., & Le Breton, J. (2007). Caste-biased acceptance of non-nestmates in a  
559 polygynous ponerine ant. *Animal Behaviour*, 73(4), 559–565.  
560 <https://doi.org/10.1016/j.anbehav.2006.04.015>
- 561 Koul, A., Becchio, C., & Cavallo, A. (2018). PredPsych: A toolbox for predictive machine learning-based  
562 approach in experimental psychology research. *Behavior Research Methods*, 50(4), 1657–  
563 1672. <https://doi.org/10.3758/s13428-017-0987-2>
- 564 Lê, S., Josse, J., & Husson, F. (2008). FactoMineR: An R Package for Multivariate Analysis. *Journal of*  
565 *Statistical Software*, 25(1), 1–18. <https://doi.org/10.18637/jss.v025.i01>
- 566 Lenoir, A. (1981). Brood retrieving in the ant, *Lasius niger* L. *Sociobiology*, 6(2), 153–178.

- 567 Lenoir, A., d’Ettorre, P., Errard, C., & Hefetz, A. (2001). Chemical Ecology and Social Parasitism in Ants.  
568 *Annual Review of Entomology*, 46(1), 573–599.  
569 <https://doi.org/10.1146/annurev.ento.46.1.573>
- 570 Lenoir, A., Depickère, S., Devers, S., Christidès, J.-P., & Detrain, C. (2009). Hydrocarbons in the Ant  
571 *Lasius niger*: From the Cuticle to the Nest and Home Range Marking. *Journal of Chemical*  
572 *Ecology*, 35(8), 913–921. <https://doi.org/10.1007/s10886-009-9669-6>
- 573 Liang, D., & Silverman, J. (2000). “You are what you eat”: Diet modifies cuticular hydrocarbons and  
574 nestmate recognition in the Argentine ant, *Linepithema humile*. *Naturwissenschaften*, 87(9),  
575 412–416. <https://doi.org/10.1007/s001140050752>
- 576 Madsen, N. E., & Offenberg, J. (2017). Effect of pleometrosis and brood transplantation on colony  
577 growth of the black garden ant, *Lasius niger*. *Asian Myrmecol*, 9, e009003.  
578 <https://doi.org/10.20362/AM.009003>
- 579 Mateo, J. M. (2015). Perspectives: Hamilton’s Legacy: Mechanisms of Kin Recognition in Humans.  
580 *Ethology*, 121(5), 419–427. <https://doi.org/10.1111/eth.12358>
- 581 Meudec, M. (1978). Response to and transport of brood by workers of *Tapinoma erraticum*  
582 (Formicidae; Dolichoderinae) during nest disturbance. *Behavioural Processes*, 3(3), 199–209.  
583 [https://doi.org/10.1016/0376-6357\(78\)90013-X](https://doi.org/10.1016/0376-6357(78)90013-X)
- 584 Mora-Kepfer, F. (2014). Context-dependent acceptance of non-nestmates in a primitively eusocial  
585 insect. *Behavioral Ecology and Sociobiology*, 68(3), 363–371. [https://doi.org/10.1007/s00265-](https://doi.org/10.1007/s00265-013-1650-2)  
586 [013-1650-2](https://doi.org/10.1007/s00265-013-1650-2)
- 587 Moreau, C. S., Bell, C. D., Vila, R., Archibald, S. B., & Pierce, N. E. (2006). Phylogeny of the Ants:  
588 Diversification in the Age of Angiosperms. *Science*, 312(5770), 101–104.  
589 <https://doi.org/10.1126/science.1124891>
- 590 Nascimento, F. S., Tannure-Nascimento, I. C., Dantas, J. O., Turatti, I. C., & Lopes, N. P. (2013). Task-  
591 Related Variation of Cuticular Hydrocarbon Profiles Affect Nestmate Recognition in the Giant

- 592 ant *Dinoponera quadriceps*. *Journal of Insect Behavior*, 26(2), 212–222.  
593 <https://doi.org/10.1007/s10905-012-9353-5>
- 594 Ojala, M., & Garriga, G. C. (2010). Permutation tests for studying classifier performance. *Journal of*  
595 *Machine Learning Research*, 11(6).
- 596 Paul, B., & Annagiri, S. (2019). Caught red-handed: Behaviour of brood thieves in an Indian ant. *Journal*  
597 *of Experimental Biology*, 222(2). <https://doi.org/10.1242/jeb.193755>
- 598 Payne, R. B., & Sorensen, M. D. (2005). *The cuckoos* (Vol. 15). Oxford University Press.
- 599 Penn, D. J., & Frommen, J. G. (2010). Kin recognition: An overview of conceptual issues, mechanisms  
600 and evolutionary theory. In P. Kappeler (Ed.), *Animal Behaviour: Evolution and Mechanisms*  
601 (pp. 55–85). Springer. [https://doi.org/10.1007/978-3-642-02624-9\\_3](https://doi.org/10.1007/978-3-642-02624-9_3)
- 602 Provost, E., Riviere, G., Roux, M., Bagneres, A. G., & Clement, J. L. (1994). Cuticular hydrocarbons  
603 whereby *Messor barbarus* ant workers putatively discriminate between monogynous and  
604 polygynous colonies. Are workers labeled by queens? *Journal of Chemical Ecology*, 20(11),  
605 2985–3003. <https://doi.org/10.1007/BF02098404>
- 606 Pulliainen, U., Helanterä, H., Sundström, L., & Schultner, E. (2019). The possible role of ant larvae in  
607 the defence against social parasites. *Proceedings. Biological Sciences*, 286(1898), 20182867.  
608 <https://doi.org/10.1098/rspb.2018.2867>
- 609 R Core Team. (2019). *R: A Language and Environment for Statistical Computing*. R Foundation for  
610 Statistical Computing. <https://www.R-project.org/>
- 611 Reeve, H. K. (1989). The Evolution of Conspecific Acceptance Thresholds. *The American Naturalist*,  
612 133(3), 407–435. <https://doi.org/10.1086/284926>
- 613 Rossi, N., Baracchi, D., Giurfa, M., & d’Ettorre, P. (2018). Pheromone-Induced Accuracy of Nestmate  
614 Recognition in Carpenter Ants: Simultaneous Decrease in Type I and Type II Errors. *The*  
615 *American Naturalist*, 193(2), 267–278. <https://doi.org/10.1086/701123>
- 616 RStudio Team. (2015). *RStudio: Integrated Development Environment for R*. RStudio, Inc.  
617 <http://www.rstudio.com/>

- 618 Ruel, C., Lenoir, A., Cerdá, X., & Boulay, R. (2013). Surface lipids of queen-laid eggs do not regulate  
619 queen production in a fission-performing ant. *Naturwissenschaften*, *100*(1), 91–100.  
620 <https://doi.org/10.1007/s00114-012-0997-y>
- 621 Satoi, S., & Iwasa, Y. (2019). Chemical mimicry or crypsis—The evolutionary game played by parasitic  
622 ants invading other colonies. *Theoretical Ecology*, 1–9. [https://doi.org/10.1007/s12080-018-](https://doi.org/10.1007/s12080-018-0406-z)  
623 [0406-z](https://doi.org/10.1007/s12080-018-0406-z)
- 624 Schultner, E., Oettler, J., & Helanterä, H. (2017). The Role of Brood in Eusocial Hymenoptera. *The*  
625 *Quarterly Review of Biology*, *92*(1), 39–78. <https://doi.org/10.1086/690840>
- 626 Schultner, E., & Pulliainen, U. (2020). Brood recognition and discrimination in ants. *Insectes Sociaux*,  
627 *67*(1), 11–34. <https://doi.org/10.1007/s00040-019-00747-3>
- 628 Searby, A., Jouventin, P., & Aubin, T. (2004). Acoustic recognition in macaroni penguins: An original  
629 signature system. *Animal Behaviour*, *67*(4), 615–625.  
630 <https://doi.org/10.1016/j.anbehav.2003.03.012>
- 631 Sharma, K. R. R., Enzmann, B. L. L., Schmidt, Y., Moore, D., Jones, G. R. R., Parker, J., Berger, S. L. L.,  
632 Reinberg, D., Zwiebel, L. J., Breit, B., Liebig, J., & Ray, A. (2015). Cuticular Hydrocarbon  
633 Pheromones for Social Behavior and Their Coding in the Ant Antenna. *Cell Reports*, *12*(8),  
634 1261–1271. <https://doi.org/10.1016/j.celrep.2015.07.031>
- 635 Sturgis, S. J., & Gordon, D. M. (2012). Nestmate recognition in ants (Hymenoptera: Formicidae): A  
636 review. *Myrmecological News*, *16*(January), 101–110.
- 637 Tannure-Nascimento, I. C., Nascimento, F. S., Dantas, J. O., & Zucchi, R. (2009). Decision rules for egg  
638 recognition are related to functional roles and chemical cues in the queenless ant *Dinoponera*  
639 *quadriceps*. *Naturwissenschaften*, *96*(7), 857–861. [https://doi.org/10.1007/s00114-009-0535-](https://doi.org/10.1007/s00114-009-0535-8)  
640 [8](https://doi.org/10.1007/s00114-009-0535-8)
- 641 Tribble, W., & Kronauer, D. J. C. (2017). Caste development and evolution in ants: It's all about size. *The*  
642 *Journal of Experimental Biology*, *220*(1), 53–62. <https://doi.org/10.1242/jeb.145292>

- 643 Trivers, R. (1972). Parental investment and sexual selection. In *Sexual Selection and the Descent of Man*  
644 (Bernard Campbell, pp. 136–179). Routledge. [https://www.routledge.com/Sexual-Selection-](https://www.routledge.com/Sexual-Selection-and-the-Descent-of-Man-The-Darwinian-Pivot/Campbell/p/book/9780202308456)  
645 [and-the-Descent-of-Man-The-Darwinian-Pivot/Campbell/p/book/9780202308456](https://www.routledge.com/Sexual-Selection-and-the-Descent-of-Man-The-Darwinian-Pivot/Campbell/p/book/9780202308456)
- 646 van Zweden, J. S., Brask, J. B., Christensen, J. H., Boomsma, J. J., Linksvayer, T. A., & d’Ettorre, P. (2010).  
647 Blending of heritable recognition cues among ant nestmates creates distinct colony gestalt  
648 odours but prevents within-colony nepotism. *Journal of Evolutionary Biology*.  
649 <https://doi.org/10.1111/j.1420-9101.2010.02020.x>
- 650 van Zweden, J. S., & d’Ettorre, P. (2010). Nestmate recognition in social insects and the role of  
651 hydrocarbons. In G. J. Blomquist & A.-G. Bagnères (Eds.), *Insect Hydrocarbons Biology,*  
652 *Biochemistry, and Chemical Ecology* (pp. 222–243). Cambridge University Press.  
653 <https://doi.org/10.1017/CBO9780511711909.012>
- 654 van Zweden, J. S., Heinze, J., Boomsma, J. J., & d’Ettorre, P. (2009). Ant queen egg-marking signals:  
655 Matching deceptive laboratory simplicity with natural complexity. *PLoS ONE*, 4(3), e4718.  
656 <https://doi.org/10.1371/journal.pone.0004718>
- 657 van Zweden, J. S., Pontieri, L., & Pedersen, J. S. (2014). A statistical approach to identify candidate cues  
658 for nestmate recognition. *Frontiers in Ecology and Evolution*, 2.  
659 <https://doi.org/10.3389/fevo.2014.00073>
- 660 Villalta, I., Amor, F., Cerdá, X., & Boulay, R. (2016). Social coercion of larval development in an ant  
661 species. *The Science of Nature*, 103(3–4), 18. <https://doi.org/10.1007/s00114-016-1341-8>  
662

663

664 **Appendices**

665 Table A1: Percentage of variance explained by the dimensions of the principal component analyses.

|           |                    | PC | Eigenvalue | % of variance | cumulative % of variance |
|-----------|--------------------|----|------------|---------------|--------------------------|
| Egg       | <i>A. senilis</i>  | 1  | 10.33      | 49.18         | 49.18                    |
|           |                    | 2  | 4.52       | 21.52         | 70.70                    |
|           |                    | 3  | 2.46       | 11.74         | 82.44                    |
|           |                    | 4  | 1.89       | 9.01          | 91.45                    |
|           |                    | 5  | 0.63       | 3.00          | 94.45                    |
|           |                    | 6  | 0.49       | 2.35          | 96.80                    |
|           | <i>C. aethiops</i> | 1  | 8.74       | 28.18         | 28.18                    |
|           |                    | 2  | 7.10       | 22.90         | 51.08                    |
|           |                    | 3  | 6.19       | 19.97         | 71.05                    |
|           |                    | 4  | 3.79       | 12.23         | 83.28                    |
|           |                    | 5  | 2.74       | 8.83          | 92.11                    |
|           |                    | 6  | 1.26       | 4.07          | 96.19                    |
|           | <i>F. fusca</i>    | 1  | 15.67      | 47.50         | 47.50                    |
|           |                    | 2  | 9.22       | 27.94         | 75.43                    |
|           |                    | 3  | 3.84       | 11.65         | 87.08                    |
|           |                    | 4  | 1.61       | 4.87          | 91.96                    |
|           |                    | 5  | 1.50       | 4.54          | 96.49                    |
|           | <i>L. niger</i>    | 1  | 9.34       | 44.47         | 44.47                    |
|           |                    | 2  | 5.85       | 27.84         | 72.31                    |
|           |                    | 3  | 2.39       | 11.39         | 83.70                    |
|           |                    | 4  | 1.24       | 5.90          | 89.59                    |
|           |                    | 5  | 0.99       | 4.70          | 94.29                    |
|           |                    | 6  | 0.46       | 2.17          | 96.46                    |
|           | <i>M. barbarus</i> | 1  | 15.64      | 53.92         | 53.92                    |
|           |                    | 2  | 4.01       | 13.84         | 67.76                    |
|           |                    | 3  | 3.64       | 12.55         | 80.32                    |
|           |                    | 4  | 2.12       | 7.30          | 87.62                    |
|           |                    | 5  | 1.27       | 4.37          | 91.99                    |
|           |                    | 6  | 0.68       | 2.36          | 94.35                    |
|           |                    | 7  | 0.60       | 2.09          | 96.43                    |
|           | <i>T. darioi</i>   | 1  | 11.00      | 45.82         | 45.82                    |
|           |                    | 2  | 5.14       | 21.41         | 67.23                    |
|           |                    | 3  | 3.72       | 15.50         | 82.73                    |
|           |                    | 4  | 2.02       | 8.40          | 91.13                    |
|           |                    | 5  | 1.00       | 4.17          | 95.30                    |
| L1 larvae | <i>A. senilis</i>  | 1  | 5.63       | 70.39         | 70.39                    |
|           |                    | 2  | 1.10       | 13.80         | 84.19                    |
|           |                    | 3  | 0.63       | 7.90          | 92.09                    |
|           |                    | 4  | 0.33       | 4.09          | 96.18                    |
|           | <i>C. aethiops</i> | 1  | 3.57       | 39.72         | 39.72                    |

|                    |   |      |       |       |
|--------------------|---|------|-------|-------|
|                    | 2 | 2.17 | 24.06 | 63.78 |
|                    | 3 | 1.72 | 19.11 | 82.89 |
|                    | 4 | 0.58 | 6.44  | 89.33 |
|                    | 5 | 0.52 | 5.74  | 95.07 |
| <i>F. fusca</i>    | 1 | 2.45 | 48.95 | 48.95 |
|                    | 2 | 1.61 | 32.28 | 81.23 |
|                    | 3 | 0.86 | 17.16 | 98.39 |
| <i>L. niger</i>    | 1 | 3.54 | 70.84 | 70.84 |
|                    | 2 | 1.00 | 20.07 | 90.91 |
|                    | 3 | 0.35 | 7.08  | 97.99 |
| <i>M. barbarus</i> | 1 | 3.34 | 47.67 | 47.67 |
|                    | 2 | 1.22 | 17.46 | 65.13 |
|                    | 3 | 1.09 | 15.54 | 80.67 |
|                    | 4 | 1.02 | 14.53 | 95.20 |
| <i>T. darioi</i>   | 1 | 2.28 | 37.99 | 37.99 |
|                    | 2 | 1.63 | 27.24 | 65.24 |
|                    | 3 | 1.24 | 20.62 | 85.86 |
|                    | 4 | 0.56 | 9.35  | 95.21 |

666 Details on the principal component analysis performed from data on the chemical identified in brood  
667 surface extracts. Eigenvalues, percentages of variance and cumulative percentage of variance of the  
668 principal components of the principal component analysis performed from the normalized areas of the  
669 selected hydrocarbons peak observed in eggs and L1 larvae surface extracts. Only principal  
670 components explaining at least 95% of the original variance are displayed.

671 Table A2: Results of the statistical analysis of linear discriminant analysis

| Ordination method | Brood type | Species            | Random accuracy | Classification accuracy | Adjusted <i>P</i> value |
|-------------------|------------|--------------------|-----------------|-------------------------|-------------------------|
| NMDS              | Egg        | <i>A. senilis</i>  | 0.20            | 0.87                    | <b>0.001</b>            |
|                   |            | <i>C. aethiops</i> | 0.33            | 0.89                    | <b>0.018</b>            |
|                   |            | <i>F. fusca</i>    | 0.33            | 1.00                    | <b>0.013</b>            |
|                   |            | <i>L. niger</i>    | 0.20            | 1.00                    | <b>0.001</b>            |
|                   |            | <i>M. barbarus</i> | 0.33            | 0.75                    | <b>0.018</b>            |
|                   |            | <i>T. darioi</i>   | 0.33            | 0.33                    | 0.166                   |
|                   |            | <i>T. darioi</i>   | 0.33            | 0.33                    | 0.166                   |
|                   | L1 larvae  | <i>A. senilis</i>  | 0.33            | 0.25                    | 0.392                   |
|                   |            | <i>C. aethiops</i> | 0.33            | 0.92                    | <b>0.001</b>            |
|                   |            | <i>F. fusca</i>    | 0.33            | 0.67                    | 0.150                   |
|                   |            | <i>L. niger</i>    | 0.25            | 0.50                    | <b>0.041</b>            |
|                   |            | <i>M. barbarus</i> | 0.25            | 0.44                    | 0.114                   |
|                   |            | <i>T. darioi</i>   | 0.33            | 0.42                    | 0.216                   |
|                   |            | <i>T. darioi</i>   | 0.33            | 0.42                    | 0.216                   |
| PCA               | Egg        | <i>A. senilis</i>  | 0.20            | 0.93                    | <b>0.001</b>            |
|                   |            | <i>C. aethiops</i> | 0.33            | 1.00                    | <b>0.043</b>            |
|                   |            | <i>F. fusca</i>    | 0.33            | 1.00                    | <b>0.043</b>            |
|                   |            | <i>L. niger</i>    | 0.20            | 1.00                    | <b>0.001</b>            |
|                   |            | <i>M. barbarus</i> | 0.33            | 1.00                    | <b>0.022</b>            |
|                   |            | <i>T. darioi</i>   | 0.33            | 0.89                    | <b>0.043</b>            |
|                   |            | <i>T. darioi</i>   | 0.33            | 0.89                    | <b>0.043</b>            |
|                   | L1 larvae  | <i>A. senilis</i>  | 0.33            | 0.25                    | 0.812                   |
|                   |            | <i>C. aethiops</i> | 0.33            | 1.00                    | <b>0.002</b>            |
|                   |            | <i>F. fusca</i>    | 0.33            | 1.00                    | <b>0.035</b>            |
|                   |            | <i>L. niger</i>    | 0.25            | 0.58                    | <b>0.039</b>            |
|                   |            | <i>M. barbarus</i> | 0.25            | 0.50                    | <b>0.039</b>            |
|                   |            | <i>T. darioi</i>   | 0.33            | 0.33                    | 0.812                   |
|                   |            | <i>T. darioi</i>   | 0.33            | 0.33                    | 0.812                   |

672 Details on the statistical analysis of the accuracy and results of permutation tests of the linear

673 discriminant analysis with leave-one sample out cross-validation.



674 Table A3: Results of the statistical analysis of nestmate / non-nestmate Euclidian distances

|           | Compared levels<br>of the variable       | Variable                           | Adjusted<br>R <sup>2</sup> | Adjusted<br>P value          |
|-----------|------------------------------------------|------------------------------------|----------------------------|------------------------------|
|           | All                                      | species                            | 0.209                      | <b>0.000</b>                 |
|           | All                                      | sample_type                        | 0.209                      | <b>0.000</b>                 |
|           | All                                      | species:sample_type<br>(Intercept) | 0.209                      | <b>0.001</b><br><b>0.017</b> |
|           | All                                      | species                            | 0.177                      | <b>0.000</b>                 |
|           | vs <i>A. senilis</i>                     | species                            | 0.041                      | 0.098                        |
|           | <i>T. darioi</i> vs <i>C. aethiops</i>   | species                            | 0.035                      | 0.193                        |
|           | vs <i>L niger</i>                        | species                            | 0.107                      | <b>0.000</b>                 |
|           | vs <i>M. barbarus</i>                    | species                            | 0.025                      | 0.193                        |
| Eggs      | vs <i>C. aethiops</i>                    | species                            | 0.016                      | 0.385                        |
|           | <i>A. senilis</i> vs <i>L niger</i>      | species                            | 0.020                      | 0.243                        |
|           | vs <i>M. barbarus</i>                    | species                            | 0.010                      | 0.385                        |
|           | <i>M. barbarus</i> vs <i>C. aethiops</i> | species                            | 0.000                      | 0.822                        |
|           | vs <i>L niger</i>                        | species                            | 0.063                      | <b>0.002</b>                 |
|           | <i>L niger</i> vs <i>C. aethiops</i>     | species                            | 0.067                      | <b>0.003</b>                 |
| L1 larvae | All                                      | species                            | 0.031                      | 0.349                        |

675 Details on the statistical analysis performed with the data on chemical distances between nestmate  
676 and non-nestmate brood samples. Adjusted R<sup>2</sup>, P values of type II ANOVA and significance of those P  
677 values for the LMM of a base ten logarithmic transformation of the ratio between nestmate and non-  
678 nestmate Euclidian distances measured with the global centroid method. These values are displayed  
679 for the test of effects of different variables on the dependent variable of the models.

680 Table A4: Results of the statistical analysis of the number of brood items transported into the refuge  
 681 by workers

|                  |                     | Origins compared   |                       | Adjusted R <sup>2</sup> | $\chi^2$     | Adjusted <i>P</i> value |
|------------------|---------------------|--------------------|-----------------------|-------------------------|--------------|-------------------------|
| Eggs             | <i>A. senilis</i>   | NNM                | vs <i>M. barbarus</i> | 0.69                    | 21.55        | <b>0.000</b>            |
|                  |                     | NM                 | vs NNM                | 0.01                    | 0.48         | 0.487                   |
|                  |                     | NM                 | vs <i>M. barbarus</i> | 0.63                    | 21.42        | <b>0.000</b>            |
|                  | <i>C. aethiops</i>  | NNM                | vs <i>F. fusca</i>    | 0.64                    | 13.33        | <b>0.001</b>            |
|                  |                     | NM                 | vs NNM                | 0.01                    | 0.31         | 0.580                   |
|                  |                     | NM                 | vs <i>F. fusca</i>    | 0.62                    | 25.37        | <b>0.000</b>            |
|                  | <i>L niger</i>      | NNM                | vs <i>F. fusca</i>    | 0.04                    | 6.16         | <b>0.013</b>            |
|                  |                     | NM                 | vs NNM                | 0.12                    | 8.66         | <b>0.007</b>            |
|                  |                     | NM                 | vs <i>F. fusca</i>    | 0.32                    | 14.29        | <b>0.000</b>            |
|                  | <i>M. bar barus</i> | NNM                | vs <i>A. senilis</i>  | 0.51                    | 16.75        | <b>0.000</b>            |
|                  |                     | NM                 | vs NNM                | 0.00                    | 0.02         | 0.890                   |
|                  |                     | NM                 | vs <i>A. senilis</i>  | 0.52                    | 20.48        | <b>0.000</b>            |
| <i>T. darioi</i> | NNM                 | vs <i>L. niger</i> | 0.00                  | 0.12                    | 0.734        |                         |
|                  | NM                  | vs NNM             | 0.07                  | 7.01                    | <b>0.024</b> |                         |
|                  | NM                  | vs <i>L. niger</i> | 0.11                  | 6.29                    | <b>0.024</b> |                         |
| L1 larvae        | <i>A. senilis</i>   | NNM                | vs <i>M. barbarus</i> | 0.72                    | 34.98        | <b>0.000</b>            |
|                  |                     | NM                 | vs NNM                | 0.01                    | 0.68         | 0.410                   |
|                  |                     | NM                 | vs <i>M. barbarus</i> | 0.67                    | 35.22        | <b>0.000</b>            |
|                  | <i>C. aethiops</i>  | NNM                | vs <i>F. fusca</i>    | 0.60                    | 22.83        | <b>0.000</b>            |
|                  |                     | NM                 | vs NNM                | 0.01                    | 0.42         | 0.519                   |
|                  |                     | NM                 | vs <i>F. fusca</i>    | 0.36                    | 19.07        | <b>0.000</b>            |
|                  | <i>L niger</i>      | NNM                | vs <i>F. fusca</i>    | 0.45                    | 7.77         | <b>0.011</b>            |
|                  |                     | NM                 | vs NNM                | 0.00                    | 0.31         | 0.575                   |
|                  |                     | NM                 | vs <i>F. fusca</i>    | 0.46                    | 12.61        | <b>0.001</b>            |
|                  | <i>M. bar barus</i> | NNM                | vs <i>A. senilis</i>  | 0.66                    | 21.50        | <b>0.000</b>            |
|                  |                     | NM                 | vs NNM                | 0.01                    | 2.80         | 0.094                   |
|                  |                     | NM                 | vs <i>A. senilis</i>  | 0.61                    | 24.66        | <b>0.000</b>            |
|                  | <i>T. darioi</i>    | NNM                | vs <i>L. niger</i>    | 0.00                    | 0.14         | 0.710                   |
|                  |                     | NM                 | vs NNM                | 0.15                    | 6.17         | <b>0.039</b>            |
|                  |                     | NM                 | vs <i>L. niger</i>    | 0.11                    | 4.75         | 0.059                   |

682 Details on the statistical analysis performed with the data on the number of brood items retrieved  
 683 during behavioural trials. Adjusted R<sup>2</sup>,  $\chi^2$ , *P* values of type II ANOVA and significance of those *P* values  
 684 for the binomial GLMM for proportional data of the number of brood items transported into the  
 685 refuges by workers depending on the colony of origin of the brood (NM: nestmate, NNM: non-  
 686 nestmate).

687 Table A5: Results of the statistical analysis of the cumulative times spent by workers antennating brood  
 688 items

|                       |                    | Origins compared          | Adjusted R <sup>2</sup> | $\chi^2$ | Adjusted P value |       |
|-----------------------|--------------------|---------------------------|-------------------------|----------|------------------|-------|
| Eggs                  | <i>A. senilis</i>  | NNM vs <i>M. barbarus</i> | 0.29                    | 6.26     | <b>0.025</b>     |       |
|                       |                    | NM vs NNM                 | 0.05                    | 0.13     | 0.717            |       |
|                       |                    | NM vs <i>M. barbarus</i>  | 0.23                    | 17.35    | <b>0.000</b>     |       |
|                       | <i>C. aethiops</i> | All origins               |                         | 0.03     | 1.46             | 0.482 |
|                       | <i>L niger</i>     | NNM vs <i>F. fusca</i>    | 0.13                    | 2.46     | 0.349            |       |
|                       |                    | NM vs NNM                 | 0.00                    | 0.03     | 0.863            |       |
|                       |                    | NM vs <i>F. fusca</i>     | 0.16                    | 1.43     | 0.463            |       |
|                       | <i>M. barbarus</i> | NNM vs <i>A. senilis</i>  | 0.19                    | 11.45    | <b>0.001</b>     |       |
|                       |                    | NM vs NNM                 | 0.03                    | 0.22     | 0.641            |       |
|                       |                    | NM vs <i>A. senilis</i>   | 0.18                    | 12.76    | <b>0.001</b>     |       |
|                       | <i>T. darioi</i>   | NNM vs <i>L. niger</i>    | 0.07                    | 1.96     | 0.324            |       |
|                       |                    | NM vs NNM                 | 0.00                    | 0.06     | 0.809            |       |
| NM vs <i>L. niger</i> |                    | 0.10                      | 5.12                    | 0.071    |                  |       |
| L1 larvae             | <i>A. senilis</i>  | NNM vs <i>M. barbarus</i> | 0.11                    | 9.94     | <b>0.005</b>     |       |
|                       |                    | NM vs NNM                 | 0.11                    | 6.90     | <b>0.017</b>     |       |
|                       |                    | NM vs <i>M. barbarus</i>  | 0.06                    | 2.95     | 0.086            |       |
|                       | <i>C. aethiops</i> | NNM vs <i>F. fusca</i>    | -0.01                   | 0.02     | 0.896            |       |
|                       |                    | NM vs NNM                 | 0.11                    | 8.27     | <b>0.012</b>     |       |
|                       |                    | NM vs <i>F. fusca</i>     | 0.12                    | 8.32     | <b>0.012</b>     |       |
|                       | <i>L niger</i>     | NNM vs <i>F. fusca</i>    | 0.11                    | 7.30     | <b>0.014</b>     |       |
|                       |                    | NM vs NNM                 | 0.00                    | 0.04     | 0.845            |       |
|                       |                    | NM vs <i>F. fusca</i>     | 0.14                    | 11.90    | <b>0.002</b>     |       |
|                       | <i>M. barbarus</i> | NNM vs <i>A. senilis</i>  | 0.04                    | 4.39     | 0.111            |       |
|                       | <i>T. darioi</i>   | NNM vs <i>L. niger</i>    | 0.01                    | 0.39     | 0.822            |       |

689 Details on the statistical analysis performed with the data on the time spent by workers antennating  
 690 brood items during behavioural trials. Adjusted R<sup>2</sup>,  $\chi^2$ , P values of type II ANOVA and significance of  
 691 those P values for the LMM of a base ten logarithmic transformation of the cumulative time spent by  
 692 workers antennating brood items depending on the colony of origin of the brood (NM: nestmate,  
 693 NNM: non-nestmate).

694 **Figure legends**

695 **Figure 1: Chemical profiles of egg and L1 larvae.**

696 Scatterplots of non-metric multidimensional scaling of the area of hydrocarbons in surface extracts of  
697 eggs and L1 larvae with three output dimensions. **A)** Plot of first and second dimensions. **B)** Plot of first  
698 and third dimensions. **C)** Plot of second and third dimensions. Data points relative to egg samples are  
699 displayed with squares and L1 larvae with triangles. *A. sensilis* data point are plotted in dark green, *C.*  
700 *aethiops* in orange, *F. fusca* in violet, *L. niger* in magenta, *M. barbarus* in light green & *T. darioi* in  
701 yellow. Information on the origins of the sample extracted can be found in supplementary table S1.  
702 Non-ordinated chemical data is reported in supplementary table S2.

703

704 **Figure 2: Colony specific hydrocarbon signature of ant early brood.**

705 Results of the analysis on chemical extracts of eggs and L1 larvae. Details on the origin of the samples  
706 used are displayed in supplementary table S1 **A)** Precisions of the linear discriminant analysis for each  
707 colony in each sample types performed from the principal components that had an F-score superior  
708 or equal to 0.01. The black narrower lines represent the mean precision for each sample type. The red  
709 wider lines represent accuracy expected from random choices. Significance of the difference of mean  
710 precisions compared to a random accuracy was computed with a permutation test. NS:  $p \geq 0.05$ ; \*:  $P$   
711  $\leq 0.05$ ; \*\*:  $P \leq 0.01$ ; \*\*\*:  $P \leq 0.001$ . **B)** Ratios of the chemical Euclidean distances between nestmate  
712 and non-nestmate measured with the global-centroid method from the principal components that had  
713 an F-score superior or equal to 0.01. The sample size refers to number of distances measured between  
714 one sample and the samples from one of the others colonies of matching species and brood type. Black  
715 dots represent outlier values that are 1.5 times outside the interquartile range. Letters represent  
716 groups of statistical similarity in each sample type (LMM; Type II ANOVA;  $P \leq 0.05$ ).

717

718 **Figure 3. Worker behaviour towards early brood.**

719 Results of behavioural experiments performed on groups of 6 workers that were presented with 3 eggs  
720 or L1 larvae that were either nestmate (NM), non-nestmate (NNM) or hetero-specific (Asen: *A. senilis*,  
721 Mbar: *M. barbarus*, Lnig: *L. niger*, Ffus: *F. fusca*). **(a)** Boxplots of the number of brood items brought  
722 into the refuge by workers in the behavioural trials. The sample size refers to the number of worker  
723 groups that were active during a given trial (the total number of worker groups tested is reported in  
724 supplementary table S1). Bottom, middle and top horizontal lines of the box represent the first, the  
725 second and the third quartile, respectively. Horizontal lines represent the rest of the data range; black  
726 dots represent possible outlier values (1.5 times outside the interquartile range). **(b)** Boxplots of the  
727 total time spent by workers antennating brood during the trials. Diamonds represent the means. The  
728 sample size refers to the number of worker groups that were active and displayed antennation  
729 behaviour during a given trial (the total number of worker groups tested is reported in supplementary  
730 table S1). Letters show groups of statistical similarity in each species (LMM; Type II ANOVA;  $P \leq 0.05$ ).  
731 Boxplots represent data as in (a).

732

733 **Figure A1. Disposition of the arenas of the behavioural assays**

734 Diagram of the behavioural trial apparatus. Six workers (three from outside the nest and three from  
735 inside the nest) in an eight cm arena with Fluon<sup>®</sup>-coated walls and a filter paper as floor. The red tube  
736 is a refuge made of a red-coated 1.5mL Eppendorf tube that had spent at least twenty-four hours in  
737 the colony box. Inside the refuge, the three late-instar larvae were given to the worker 24h prior  
738 experimentation. Outside the refuge, the three L1 larvae (either nestmate, non-nestmate or hetero-  
739 specific) are the ones given to the workers during the trials.

740

741 **Figure A2. Brood items surface extracts.**

742 Representative chromatograms of surface extracts of *A. senilis*, *C. aethiops*, *L. niger*, *M. barbarus* and  
743 *T. darioi* eggs and L1 larvae. Extracts were obtained from single eggs or larvae. Each peak with a  
744 number result from hydrocarbons that are found consistently across all samples of the same species  
745 and brood type (detailed in supplementary table S2).

746

747 **Figure A3. Quantity of surface hydrocarbons in eggs and L1 larvae extracts.**

748 Dot plots of the quantity (in ng) of hydrocarbons in surface extract of eggs and L1 larvae from *T. darioi*,  
749 *L. niger*, *C. aethiops*, *M. barbarus* and *A. senilis*. The black bar represents the mean for each species  
750 and sample type.

751

752 **Figure A4: PCA dimensions heatmaps**

753 Heatmaps of the principal components representing 95% of the initial variability of the normalized  
754 areas of the peaks obtained from surface extracts of eggs and L1 larvae. The values of the principal  
755 components are normalized relative to the highest absolute value observed for each principal  
756 component in each samples type. Each line is an individual sample. Samples from the same colony are  
757 grouped into the same square.

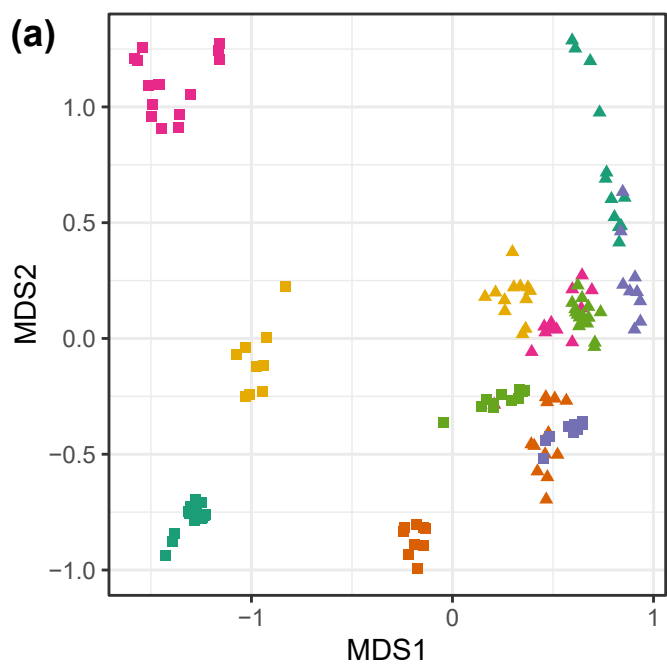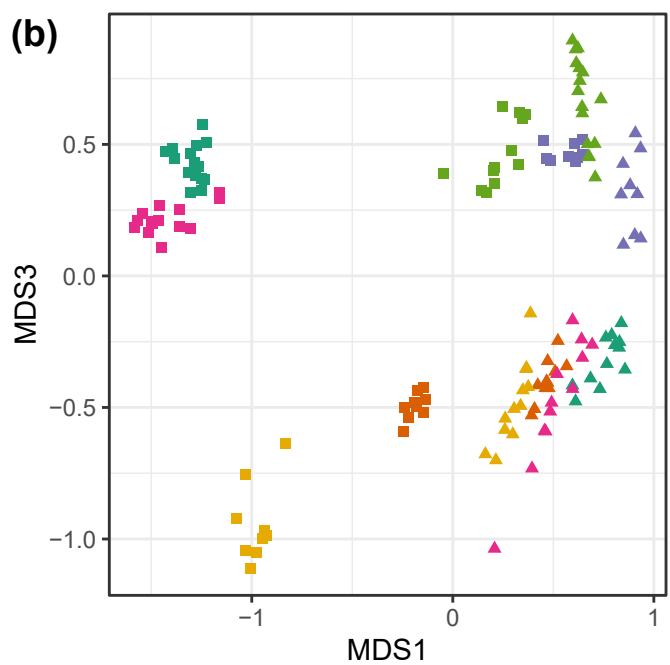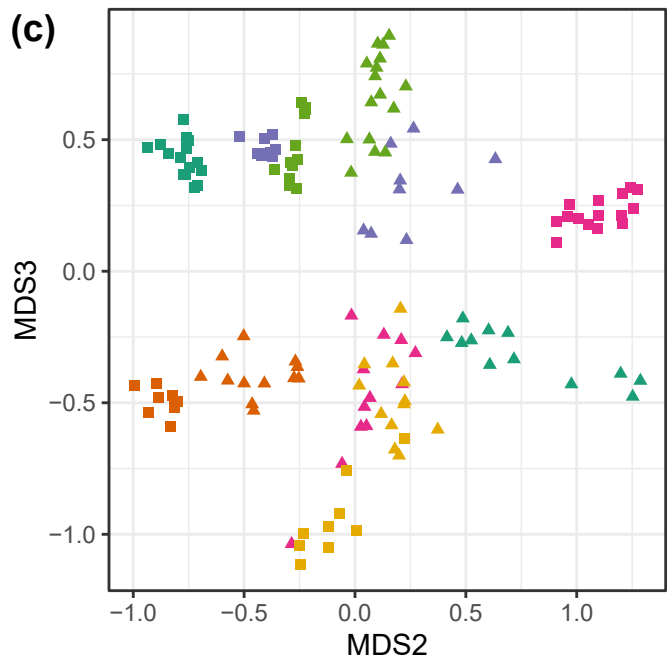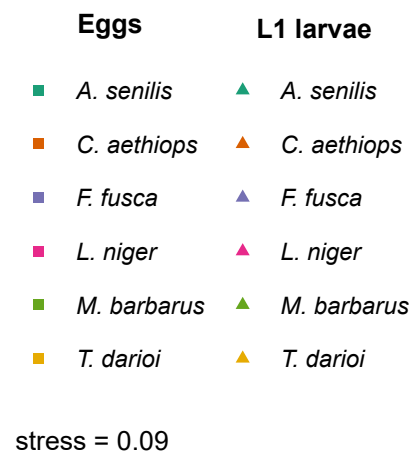





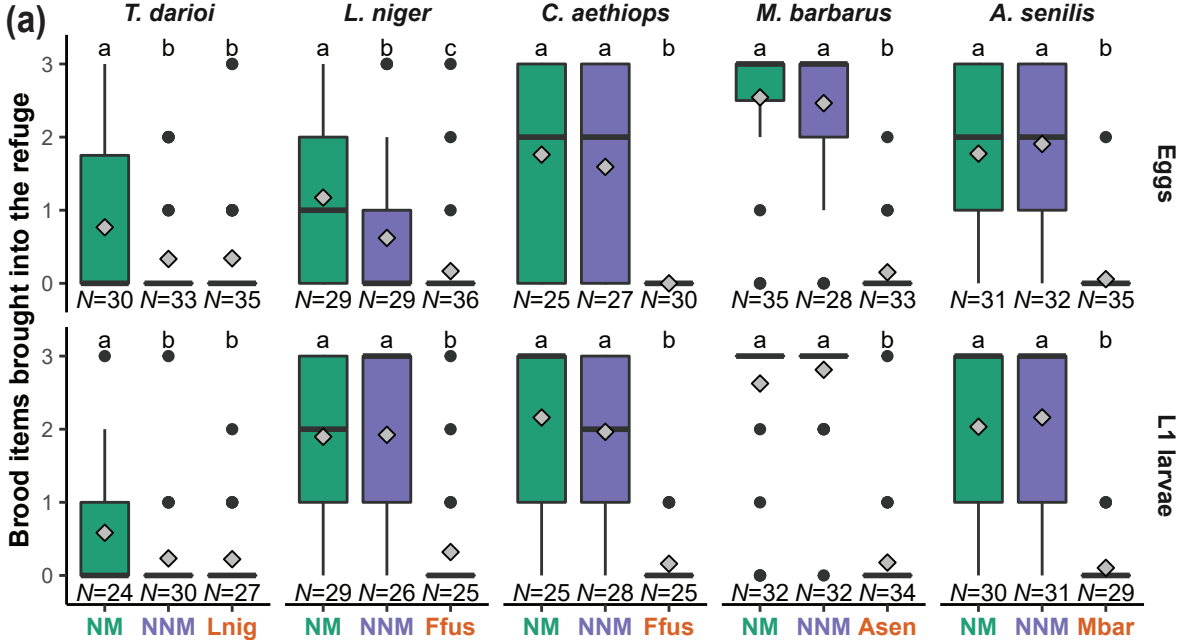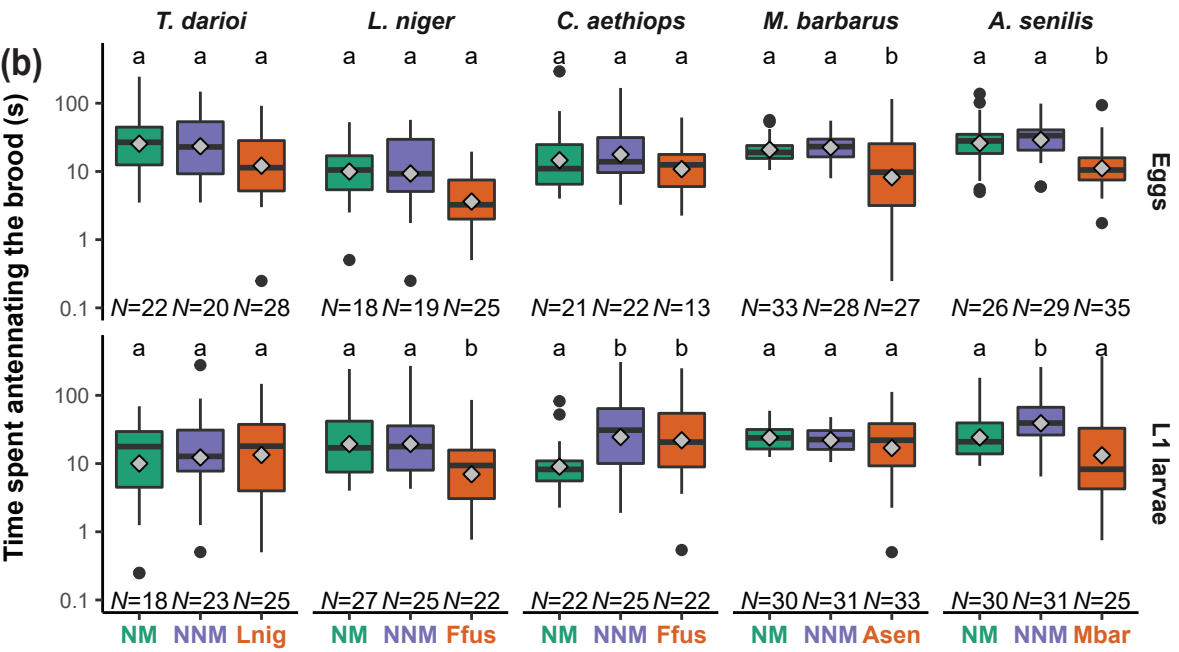

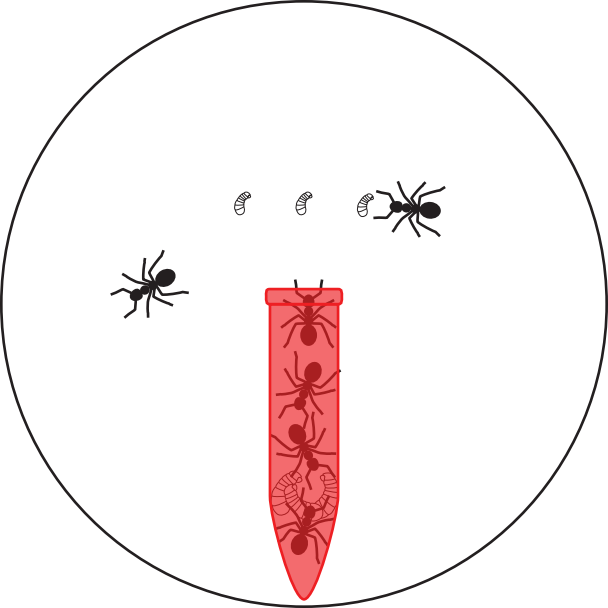

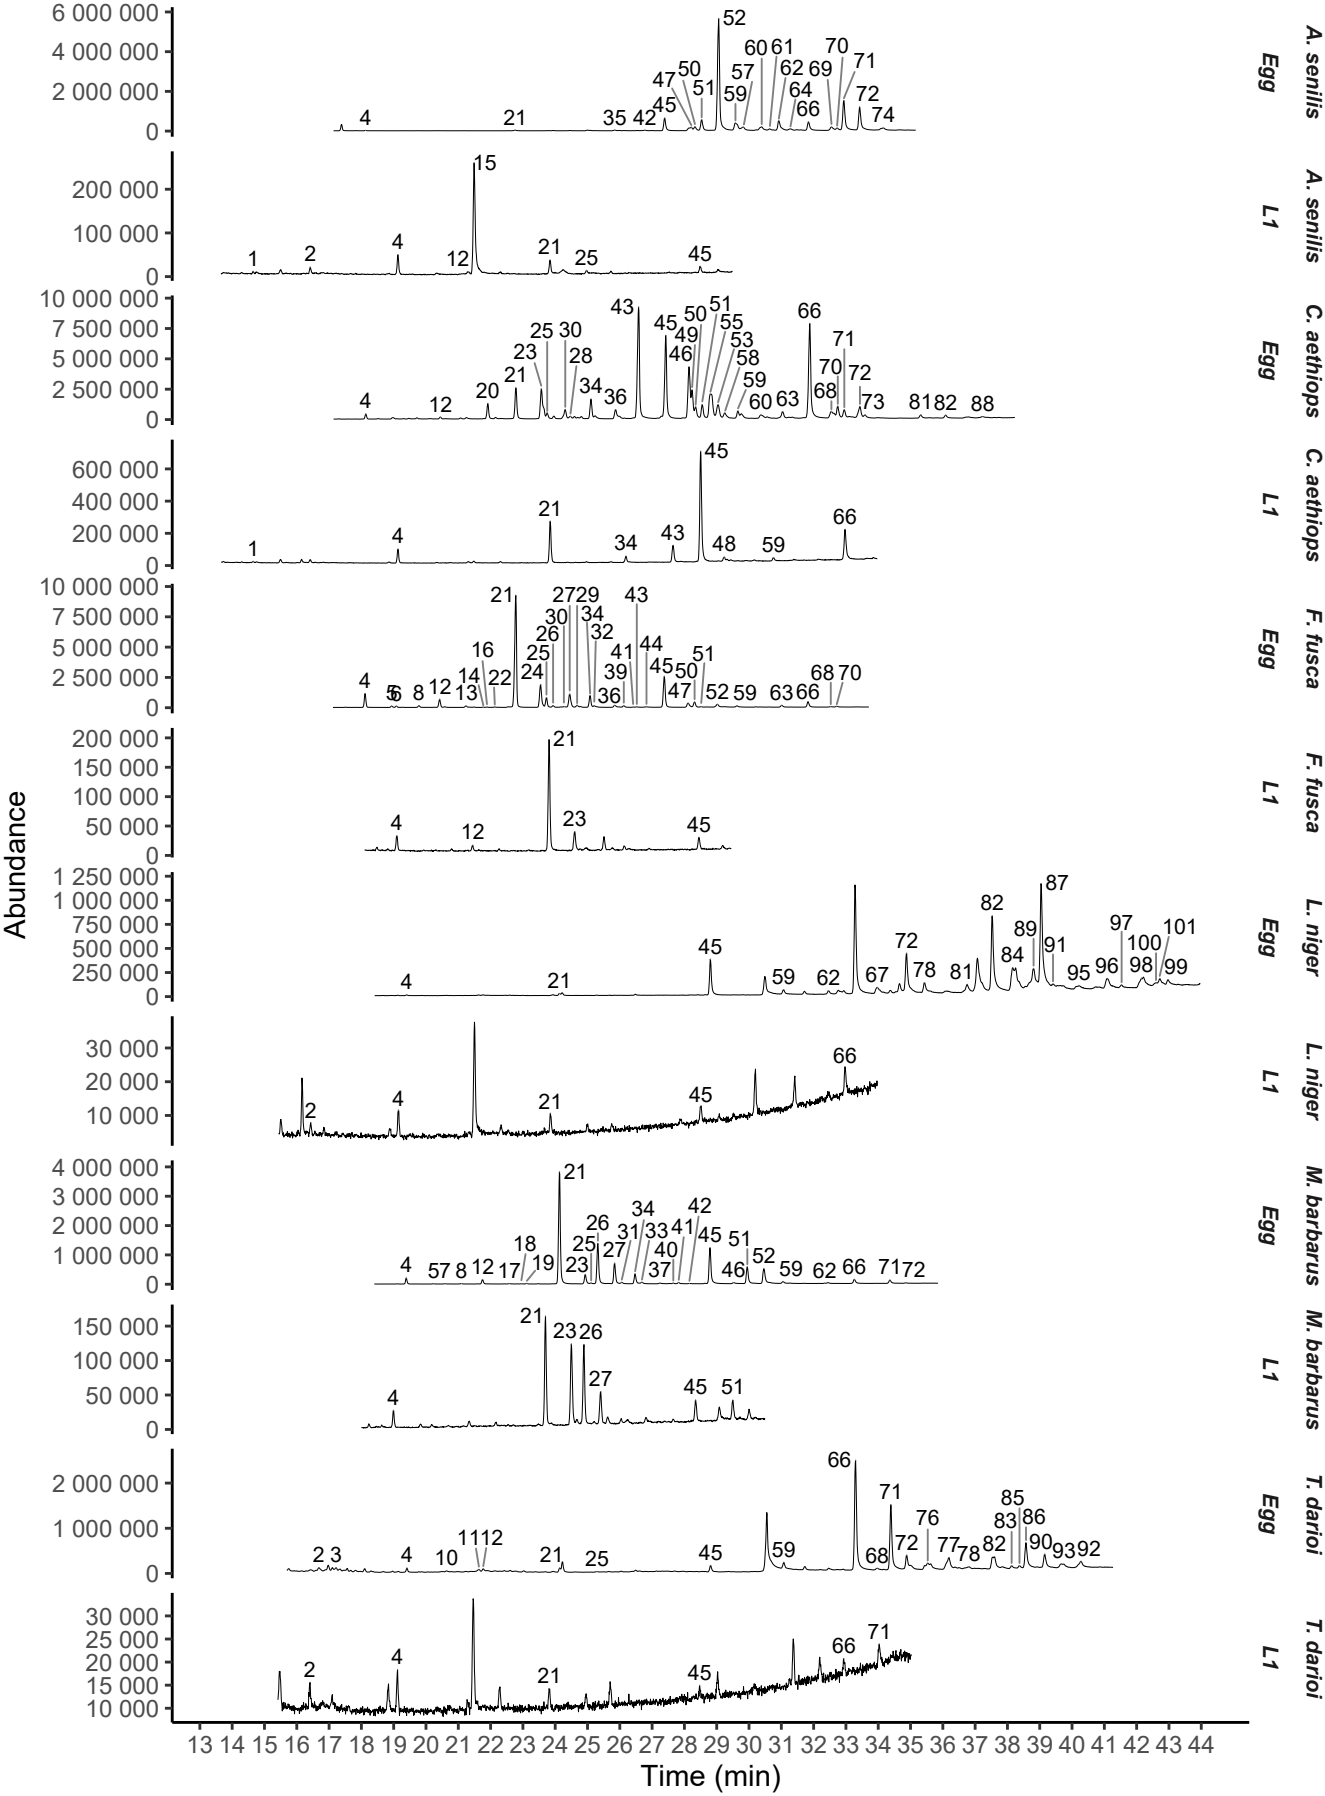

Individual CHC quantity (ng)

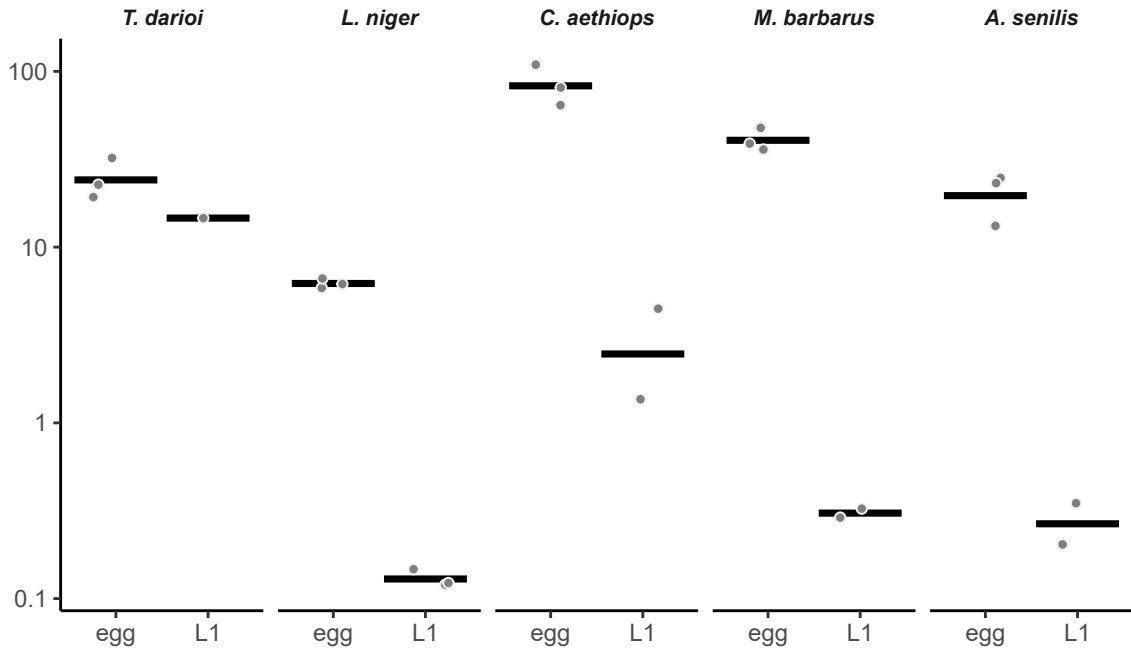

## Eggs

*T. darioi*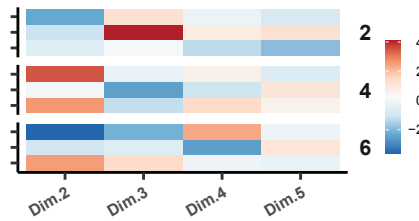*L. niger*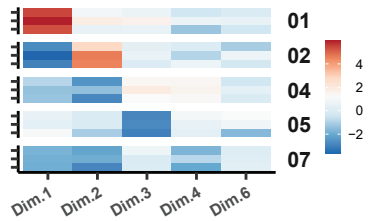*T. darioi*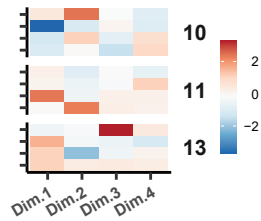*L. niger*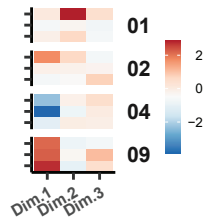*C. aethiops*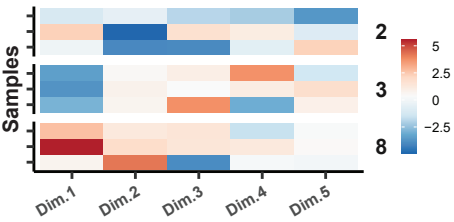*F. fusca*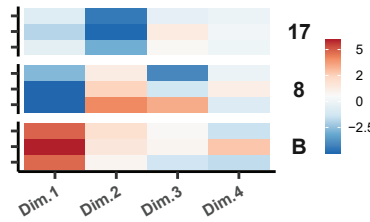*C. aethiops*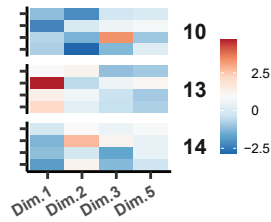*F. fusca*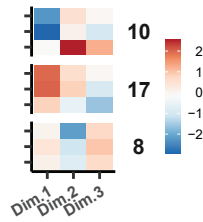*A. senilis*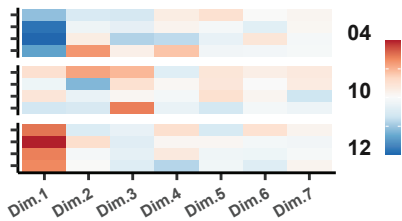*M. barbarus*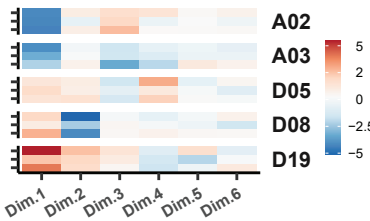*M. barbarus*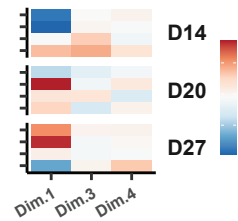*A. senilis*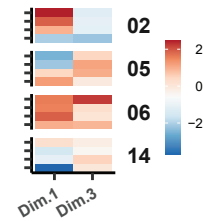

PCA Dimensions
