# 1 Nestmate recognition of early brood in ants

2

3 Arthur de Fouchier<sup>1,4</sup>, Chloé Leroy<sup>1</sup>, Abderrahman Khila<sup>2</sup>, Patrizia d'Ettorre<sup>1,3</sup>

4 <sup>1</sup> Laboratoire d'Éthologie Expérimentale et Comparée, Université Sorbonne Paris Nord, Villetaneuse,  
5 France

6 <sup>2</sup> Université de Lyon, Institut de Génomique Fonctionnelle de Lyon, CNRS UMR 5242, Ecole Normale  
7 Supérieure de Lyon, Université Claude Bernard Lyon 1, Lyon, France

8 <sup>3</sup> Institut Universitaire de France (IUF), Paris, France

9 <sup>4</sup> Present adress: Institut d'Ecologie et des Science de l'Environnement de Paris, INRAE, Sorbonne  
10 Université, CNRS, IRD, UPEC, Université Paris Diderot, Paris, Versailles, France

11

## 12 Keywords

13 Ants, Brood retrieval, Cuticular hydrocarbons, Nestmate recognition, Social parasitism

14

## 15 Abstract

16 Brood is critically important in social insect colonies. It carries the colony fitness through delivering  
17 future reproductive adults as well as workers that will increase the colony's workforce. Adoption of  
18 non-nestmate brood can be a mean to increase colony's workforce but entails the risk of rearing  
19 unrelated sexuals or social parasites. For early brood (eggs and L1 larvae), this balance is less positive  
20 as young brood need a substantial amount of resource before becoming workers. Thus, it appears  
21 beneficial for ant workers to discriminate between nestmate and alien brood using the chemical cues  
22 displayed at the brood's surface. However, the chemical signature of ant early brood stages and its  
23 use by workers remains understudied. To fill this gap, we investigated the chemical basis of early  
24 brood nestmate and cross-species recognition in six Formicoid ants. We also tested the  
25 discrimination behaviour of workers in brood retrieval trials. We observed clear species-level cues  
26 and discrimination against heterospecific brood. We also found that eggs and most young larvae  
27 display a colony signature but that only some species discriminate against non-nestmate eggs and L1  
28 larvae. Interestingly, these species appear to also be those belonging to genera subject to brood  
29 parasitism.

## 30 Introduction

31 In ants, workers are fully or partially sterile [1,2]. Workers achieve fitness indirectly by rearing their  
32 mother's brood to provide workforce and future reproductive individuals (males and queens). This  
33 reproductive division of labour is a hallmark of highly social societies and place brood at the centre of  
34 ant colonies. Workers promptly retrieve eggs and larvae found outside the nest [3], and secure them  
35 in case of colony disturbance [4]. Behavioural studies have shown that ant workers adopt brood from  
36 other nests, and even other species, while keeping a preference for nestmate eggs and larvae [5].

37 Brood adoption is an adaptive behaviour as larvae raised in a foreign and unrelated nest may  
38 eventually integrate the colony workforce [6,7]. Incipient colonies of *Lasius niger* and *Messor*  
39 *pergandei* often raid brood from close-by colonies to increase their chance of survival [8]. Brood  
40 theft can also take place during nests relocation [9]. However, adopting non-nestmate brood entails  
41 a risk. Some ant species are subject to social parasites, such asinquilines and slave-makers, which  
42 take advantage of the host workers to raise their own brood and have a clear negative impact on the  
43 fitness of their host colony. [10,11].

44 In theory, adopting non-nestmate brood involves a trade-off, for ant workers, between the gain of  
45 future workforce and the potential cost of raising unrelated reproductive individuals or accepting a  
46 social parasite [7]. It seems thus adaptive to develop counter-measures to avoid such risks. Among  
47 the possible adaptations, there is the ability of workers to recognize intruding non-nestmate adults  
48 and brood [12], as occurs in populations subjects to brood parasitism [13]. However, adaptations at  
49 the species level are not well understood [10,11].

50 Ants are usually efficient in recognising non-nestmates and behave aggressively toward competitors  
51 for the resources of the environment [14]. Nestmate recognition relies on the detection of colony-  
52 specific chemosensory cues. These are long chain hydrocarbons found on the outer surface of  
53 developing and adult individuals. The hydrocarbons can be linear, saturated or unsaturated, or  
54 contain methyl groups (methyl-branched alkanes) [15,16]. The blend of hydrocarbons displayed by  
55 each individual is the results of both genetic [16] and environmental factors [17]. Consequently,  
56 members of the same colony, which are often related and live in the same environment, share  
57 similar hydrocarbon profiles. Cuticular hydrocarbons homogenize between members of the colony  
58 through mutual grooming, food sharing, inter-individual contacts or contact with the nest-material  
59 [16,18].

60 The importance of brood nestmate recognition for ant colonies led to 40 studies in 33 ant species (as  
61 reviewed in [5]). However, those studies focused mostly on mid to late-stage larvae, while early  
62 brood stages remain understudied. Hydrocarbons displayed on ant eggs have been studied in few  
63 genera [19–25]. To our knowledge, a colony-level signature of the surface hydrocarbons of the eggs  
64 has been convincingly found in two genera, belonging to the Ponerinae and the Formicinae [21,25].

65 Eggs can acquire the hydrocarbon signature through various mechanisms. The source of colony-level  
66 cues on brood is a question better studied in eggs than larvae. Freshly deposited eggs already bear  
67 the colony signature [25]. Mothers appear to deposit hydrocarbons on eggs while they are maturing  
68 in their ovaries [20,26]. Once laid, eggs surface hydrocarbons could be influenced by contact with  
69 workers and allo-grooming [16,27]. However, the effect of contact alone is probably not a rapid  
70 process [28]. It is possible that embryos produce hydrocarbons that might traverse the chorion  
71 through pores and modify the egg surface hydrocarbons [29].

72 Surface hydrocarbons and nestmate recognition of early stage larvae remains critically understudied.  
73 When larvae hatch from their egg, it is unclear if the surface hydrocarbons are transferred to the

larvae or if freshly hatched larvae shall *de novo* synthesize surface hydrocarbons [30]. In *Aphaenogaster senilis*, the quantity of surface hydrocarbons on larvae is smaller compared to eggs and workers [31]. Most of the hydrocarbons on the surface of eggs are likely not transferred to the larvae. As such, whether first instar larvae display enough cues to be recognised as nestmate remains an open question.

In this study, we aimed at filling the gap in our knowledge of nestmate recognition of early brood stages in ants. We investigated the colony-level signature of surface hydrocarbons of eggs and first instar (L1) larvae from six species belonging to three different subfamilies of the Formicoid clade [32]: Myrmicinae, Formicinae and Dolichoderinae. To assess how selective workers are when adopting brood, we studied brood retrieval behaviour of workers facing eggs and L1 larvae originating from their colony (nestmate), from another homospecific colony (non-nestmate) or from another species (heterospecific).

## 86 Material and Methods

87 For complete details on the materials and methods, see Supplementary Material and Methods.

### 88 Ant colonies

89 We used colonies of six ant species: *Aphaenogaster senilis* (Formicidae, Myrmicinae), *Camponotus*  
90 *aethiops* (Formicidae, Formicinae), *Formica fusca* (Formicidae, Formicinae), *Lasius niger* (Formicidae,  
91 Formicinae), *Messor barbarus* (Formicidae, Myrmicinae) and *Tapinoma darioi* (Formicidae,  
92 Dolichoderinae) housed in the laboratory.

### 93 Chemical analyses

94 We collected at least three eggs and first instar larvae from at least three different colonies for each  
95 of the six species. Surface hydrocarbons were extracted from eggs and larvae using 10µl of n-  
96 pentane (≥99%, HPLC grade, Sigma-Aldrich) for 2 minutes. We then injected 3 µL of the extract into  
97 an Agilent 7890A gas chromatograph (GC) coupled to an Agilent 5975C mass spectrometer (MS).

### 98 Behavioural experiments

99 The aim was to test the behaviour of workers when facing nestmate, homo-specific non-nestmate or  
100 hetero-specific eggs or first instar larvae. The same protocol was followed for eggs and L1 larvae  
101 trials, which were performed independently. Brood and workers originated from twelve *A. senilis*  
102 colonies, ten *C. aethiops*, *Lasius niger* and *M. barbarus* colonies and six *T. darioi* colonies. Six *F. fusca*  
103 colonies were used as source of hetero-specific brood. We prepared groups of six nestmate workers  
104 (three from outside the nest and three from inside the nest) in an eight cm arena with a filter paper  
105 as floor and with walls coated with Fluon® (AGC Chemicals Europe, Thornton-Cleveleys, United  
106 Kingdom). Each group was given a refuge made of a red-coated 1.5mL Eppendorf tube (that had  
107 spent at least twenty-four hours in the box of the original colony), three late-instar larvae from their  
108 own colony, food (mixture of honey and apple) and water. After twenty-six hours of acclimation, if  
109 the workers had brought the late-instar larvae into the refuge, we removed food and water and  
110 started the behavioural trials.

111 Shortly before the trials, we collected eggs or L1 larvae from the colony of origin of each groups of  
112 workers (nestmate), from another colony of the same species (non-nestmate) or from another  
113 species (hetero-specific). For heterospecific brood, we used brood from species of the same  
114 subfamily and of similar size when available. For *A. senilis*, we used *M. barbarus* brood and *vice*  
115 *versa*. For *C. aethiops* and *L. niger*, we used *F. fusca* brood. For *T. darioi*, we used *L. niger* brood. For  
116 each trial, three brood items were deposited in a line (Supplementary Figure S1). All three of these  
117 were either nestmate, or non-nestmate or heterospecific relative to the workers. The behaviour of  
118 the workers towards the brood items was video recorded with an FDR-AX33 Sony camera for fifteen  
119 minutes. After fifteen additional minutes, any brood that had not been brought inside the refuge  
120 were removed from the arena. Thirty minutes later, another set of three brood items with a different  
121 origin were presented to the same group of workers. This was repeated three times. Therefore, each  
122 group of workers received nine brood items in total in 3 different trials of all the three possible  
123 origins. The order of presentation of the type of brood items was controlled to prevent any bias.

124 The behaviour of the workers was scored for the first 15 minutes after the first brood item was  
125 deposited using the software Boris v7.9.15 [33]. We noted the times where workers started and  
126 stopped to antennate a brood item and the times when a worker entered the refuge with a  
127 transported brood item. Trials for which the workers did not enter in contact with the brood items  
128 were discarded from further analysis as workers were considered inactive.

129

## Data and statistical analyses

Data was analysed using R Studio (v1.3.1093 , RStudio Team, 2015) and R software (v4.0.0, R Core Team, 2020).

### *Chemical data*

For each colony and species, we analysed between three and four samples. We selected peaks that were present in all the samples of the same species. We integrated the area of each peak and normalised it to the sum of the area of all peaks in a given sample. We then did a principal component analysis (PCA) for each species, keeping enough components to describe at least 95% of the total variance. Using components with an F-score, relative to the colony of origin, superior or equal to 0.01, we computed linear discriminant analysis for each species and brood types separately using the colony of origin as classification variable with a leave-one sample out cross-validation. To test the significance of the accuracy of classification obtained, we used permutation tests with 5000 simulations.

To assess the variability of the difference between nestmate and non-nestmate chemical signatures across species, we computed intra and inter-colony Euclidian distance between nestmates and non-nestmates using the global centroid method [36]. To assess the variation of intra-colony distances between species, we computed the ratio between intra and inter-colony distances. We then performed type II ANOVA on linear mixed-effects models (LMM) of the effect of the species of origin of the samples on the ratios of the intra and inter-colony chemical distances. Sample ID and colony of origin were used as nested random factors. The colony used for the inter-colony distance was a random factor as well. P-values were adjusted for multiple comparisons across species for each type of brood using Holm's method.

### *Behavioural data*

We tested whether the source of the brood item had an effect on two different variables: 1) the number brood items brought into the refuge in each trial; 2) the total time workers spent antennating the brood items. The number of brood items brought to refuge was analysed using generalised linear mixed-effect models (GLMM). For the cumulative duration of antennation, we used LMMs. The colony of origin of the workers, their group identity, the origin and the order of the brood encountered during the three trials were used as random factors. Post hoc differences were tested with type II ANOVAs. P-values were adjusted for multiple comparisons as above.

## Results

### Egg surface hydrocarbons

In the extracts of egg surface compounds, we could observe between 21 (*A. senilis* and *L. niger*) and 31 (*C. aethiops*) peaks containing hydrocarbons that were consistently present in samples of the same species (Figure 1, Supplementary Figure S2). These profiles contained a majority of methyl-alkanes and a smaller proportion of alkanes. In *T. darioi*, *L. niger* and *F. fusca* egg samples, we also observed a small proportion of alkenes. (Figure 1.A). The chemical profile of larvae had a lower quantity of hydrocarbons compared to eggs (Figure 1.B) and a smaller diversity of compounds (Figure 1.A). We found between 5 (in *L. niger* and *F. fusca*) and 9 (in *C. aethiops*) peaks containing hydrocarbons with a majority of alkanes and a lower proportion of methyl-alkane in almost all species. In *M. barbarus*, both families of compounds were present in similar numbers (Figure 1.B). We did not observe any alkenes among the surface hydrocarbons extracted from larvae. The most common compounds are C<sub>23</sub>, C<sub>25</sub> and C<sub>27</sub> (peaks 4, 21 and 45), which are present across all species in surface profiles of both eggs and larvae (Figure 1.C, Supplementary Table S1). The alkane C<sub>28</sub> (peaks 59) was found in all egg samples. In almost all cases, compounds found in L1 larvae extracts were also present in eggs exacts (Figure 1.C, Supplementary Table S1). The only exception is a diMeC<sub>24</sub> (peak 15) found on *A. senilis* larvae.

Principal component analyses indicate that there is a colony-specific blend of surface hydrocarbons, (Supplementary Figure S3, Supplementary Table S2). Using a linear discriminant analysis, we observed that chemical profiles allowed the prediction of the colony of origin of the samples significantly better than by chance for all the egg samples (permutation test,  $p \leq 0.05$ , Figure 2.A, [37,38]). The accuracy of prediction of the colony of origin was 100% for *L. niger*, *C. aethiops*, *F. fusca* and *M. barbarus* eggs. For *T. darioi* and *A. senilis* eggs, the prediction of the colony of origins was not completely accurate (88.89% and 93.33% respectively). In larvae samples, the hydrocarbon profiles allowed the identification of the colony of origin in *L. niger*, *C. aethiops*, *F. fusca* and *M. barbarus* (permutation test,  $p \leq 0.05$ , Figure 2.A). However, unlike for egg samples, the accuracy of prediction of the colony of origin was 100% only for *C. aethiops* and *F. fusca*. Regarding *M. barbarus* and *L. niger* L1 larvae, the predictions were accurate around two thirds of the time. For *T. darioi* and *A. senilis* L1 samples, prediction of the colony of origin was inaccurate and not different from random.

To compare the difference between colony hydrocarbon profiles across species, we normalised the nestmate chemical distances relative to the non-nestmate distances in each species (Figure 2.B). The difference in colony signatures are similar for larvae and for eggs in most species. However, in *L. niger* and *F. fusca* eggs differences in colony signatures are larger compared to *T. darioi*, *C. aethiops* and *M. barbarus* nestmate to non-nestmate distances (LMM,  $p \leq 0.05$ , Type II ANOVA; Supplementary Table S3). Consistently with our analysis of the existence of a colony signature in the chemical profiles of eggs, the large majority of ratios between nestmate and non-nestmate eggs chemical distances are inferior to one (*i.e.* distance between nestmates is smaller than between non-nestmates). For larvae, cases of ratios superior to one (*i.e.* distance between nestmates is greater than between non-nestmates) appear more frequently, which is consistent with our observations that colony signatures are either absent or less clear on L1 larvae.

### Brood discrimination by ant workers

From the results of our chemical analysis, we would predict that ant workers are able to discriminate between homo-specific and hetero-specific brood. The discrimination between nestmate and non-nestmate would be possible for eggs but more difficult for L1 larvae, especially in *A. senilis* and *T.*

*darioi*. Using behavioural assays, we measured the number of brood items retrieved by workers (Figure 3.A) as well as the time they spent antennating the brood (Figure 3.B).

For *T. darioi*, nestmate eggs were retrieved significantly more frequently compared to hetero-specific items (GLMM,  $p \leq 0.05$ , Type II ANOVA; Supplementary Table S4). We observed no differences in the number of non-nestmate and hetero-specific eggs retrieved by *T. darioi* workers. *L. niger* workers brought significantly more nestmate eggs into the refuge compared to non-nestmate and hetero-specific eggs (GLMM,  $p \leq 0.05$ , Type II ANOVA; Supplementary Table S4). The number of non-nestmate eggs retrieved by *L. niger* workers was higher than the number of hetero-specific ones. The results for *A. senilis*, *C. aethiops*, *L. niger* and *M. barbarus* assays were similar: workers transported significantly more nestmate and non-nestmate eggs than hetero-specific ones into the refuge (GLMM,  $p \leq 0.05$ , Type II ANOVA; Supplementary Table S4). There was no significant difference between the number of nestmate and non-nestmate eggs retrieved by workers.

Regarding L1 larvae, *T. darioi* workers retrieved significantly more nestmate L1 larvae than non-nestmate and hetero-specific ones. There were no differences in the, almost null, number of non-nestmate and hetero-specific larvae retrieved by *T. darioi* workers. Observations for *L. niger*, *A. senilis*, *C. aethiops*, and *M. barbarus* L1 larvae trials were similar. The number of nestmate and non-nestmate L1 larvae transported into the refuge by workers were similar and significantly higher than the number of hetero-specific L1 larvae. Overall, the results of the behavioural assays show that ant workers are able to discriminate between homo-specific and hetero-specific eggs and L1 larvae. Furthermore, we observed that *L. niger* and *T. darioi* discriminate between nestmate and non-nestmate eggs and only *T. darioi* workers discriminate between nestmate and non-nestmate L1 larvae.

Antennation allows ants to use their chemical and mechanical sensors to explore items. A longer antennation time is a sign of a higher interest or more complex identification of the item. *A. senilis* and *M. barbarus* workers spent significantly more time antennating nestmate and non-nestmate eggs compared to hetero-specific eggs (LMM,  $p \leq 0.05$ , Type II ANOVA; Supplementary Table S5). *L. niger* workers antennated for a significantly longer time nestmate and non-nestmate L1 larvae when compared to hetero-specific ones (LMM,  $p \leq 0.05$ , Type II ANOVA; Supplementary Table S5). For *C. aethiops*, antennation times were significantly shorter when comparing nestmate to non-nestmate and hetero-specific L1 larvae (LMM,  $p \leq 0.05$ , Type II ANOVA; Supplementary Table S5). Finally, *A. senilis* workers spent less time antennating nestmate and hetero-specific L1 larvae compared to non-nestmate larvae (LMM,  $p \leq 0.05$ , Type II ANOVA; Supplementary Table S5).

Overall, our behavioural trials show that ant workers discriminate between brood items from their colony and hetero-specific ones. However, discrimination between nestmate and homo-specific non-nestmate brood is evident only in *L. niger* and *T. darioi*.

## Discussion

Our chemical analysis and behavioural trials allow a better understanding of species and colony-level chemical cues in the early brood stages of Formicoid ants as well as the discriminatory behaviour that is dependent on those cues. The quantity and the diversity of cues displayed is clearly smaller in first instar larvae compared to eggs in all species studied. This supports the hypothesis that when larvae hatch from the egg the hydrocarbons are not transferred from the egg's chorion to the larval cuticle.

The hydrocarbons observed on the surface of egg and L1 larvae are similar to those found in adults [15,39]. As such, they should be detected by the sensory systems of all ant species [40]. Our chemical analysis clearly showed that the surface hydrocarbons of eggs and L1 larvae are different among species. The inter-specific differences allow ant workers to discriminate both eggs and larvae of their species from brood of a different species in all our behavioural trials. This is consistent with what has been observed for eggs in some *Formica* species [5,41].

Are ants able to recognise the colony of origin of conspecific eggs? We observed colony-specific blend of hydrocarbons on eggs, suggesting that the display of colony cues on eggs is a trait present across the Formicoid ants (three of the five subfamilies). This is consistent with observations in seven *Formica* species [25]. Despite the presence of colony-specific cues, only *T. darioi* and *L. niger* workers discriminated against non-nestmate eggs in our behavioural trials. Data from the literature show that *F. fusca* workers and larvae discriminate against non-nestmate eggs [42,43]. Interestingly, our results showed that discrimination against non-nestmate eggs is not consistently correlated with larger differences between nestmate and non-nestmate odours. This indicates that non-nestmate discrimination can rely both on clearer display of the colony of origin or more accurate recognition of the cues displayed.

Can workers recognise nestmate first instar larvae? Our chemical analysis and behavioural trials with L1 larvae draw a less clear picture than for eggs. Data in the literature are also scant. Larvae from both Formicinae species we studied (*L. niger* and *C. aethiops*) and those from *M. barbarus* (Myrmicinae) display a colony-specific chemical signature. However, these signatures did not allow for reliable identification of the colony of origin in two species from different subfamilies (*M. barbarus* and *L. niger*). We could not demonstrate the presence of a colony signature in the surface hydrocarbons of *T. darioi* (Dolichoderinae) and *A. senilis* (Myrmicinae) larvae. Surprisingly, *T. darioi* workers were the only ones discriminating between nestmate and non-nestmate larvae, which indicates that the larvae do display enough cues for colony recognition. This means that *T. darioi* workers either act on chemical cues that our method of analysis could not detect or use non-chemical cues. However, to our knowledge, the literature does not support the hypothesis that workers use non-chemical cues (e.g. visual or auditory) for nestmate larvae recognition. As such, the hypothesis that *T. darioi* first instar larvae displaying a colony odour seems the most plausible.

We observed *A. senilis* and *C. aethiops* workers behaving differently when facing nestmate larvae compared to non-nestmate larvae (i.e. different antennation durations). Is this an indication that they are able to recognise nestmate L1 larvae from non-nestmate larvae? On *C. aethiops* L1 larvae, we could detect a colony-level chemical signature. We could not do so on *A. senilis* first instar larvae, but neither could we on *T. darioi* larvae despite the clear behavioural evidences that they do display a colony signature. Given the lower overall quantity of surface hydrocarbons on L1 larvae compared to eggs, the chemical cues displayed might challenge the olfactory detection system of ant workers and the presence of non-nestmate cues might appear ambiguous to them. The long antennation time observed would then be a sign of the ant's difficulty to recognize the signature. Similar hesitation has been observed for recognition of ambiguous colony cues on adults [44].



Taken together, our observations allow us to confidently state that workers recognise and favour nestmate first instar larvae only for *T. darvizi*. In the other species, the cues are either too challenging to recognise for the workers or they just don't act on them. Discrimination against non-nestmate eggs, doesn't implies favouring nestmate first instar larvae. This differences across stages in non-nestmate discrimination probably arose from the differences in the quality and the diversity of the chemical cues displayed as the surface of the brood. Unlike eggs, larvae likely have to synthesize the chemical cues they display from the first day of their life.

Looking at our observations and those from the literature with a phylogenetic perspective supports the hypothesis that egg surface hydrocarbons display sufficient information for ant workers to discriminate nestmate from non-nestmate eggs across most of the ants' phylogenetic tree. The predominance of non-nestmate eggs discrimination in the majority of the Formicoid ant subfamily studied (2 out of 3) would indicates that the last common ancestor of Formicoid ants was discriminating against non-nestmate eggs. *Dinoponera quadriceps* workers also favour nestmate eggs [21]. The last common ancestor of Formicoids and Poneroids would have been also discriminating against non-nestmate eggs, but these evolutionary hypotheses require more work to be supported.

The three Formicoid species that discriminate against non-nestmate eggs belong to genera prone to social parasitism. Indeed, *L. niger* is host to various social parasites from the *Lasius* genus [11]. And the *Tapinoma* genus is known to be subject to parasitism by *Bothriomyrmex* species [10,11]. Furthermore, host species of the *Formica* genus also discriminate against non-nestmate eggs [41]. Our results and those from the literature are thus in accordance with the hypothesis that higher non-nestmate brood discrimination could arise from the arms race between social parasites and host species [43]. The parasites trying to get themselves recognised as nestmates inducing a more strict discrimination of eggs as a species level adaptation in hosts [13].

Discrimination can lead to costly errors [45]. Accordingly, the three species we studied which are not subject to an arms race with social parasites do not discriminate against non-nestmate brood. Brood adoption appears less risky in those non-host species while recognition errors (discarding of nestmate brood) represent a potential loss to the colony's fitness. This would explain the reduction or disappearance of the discriminatory behaviour against non-nestmate eggs. Identification of first instar larvae, which do not display as much chemical cues as eggs, appears a more challenging task, which prevents a stricter non-nestmate discrimination in most species even parasitized ones. Overall, our results support the hypothesis that social parasites induce a selective pressure on host species, which maintain the discrimination against non-nestmate eggs while non-host species are less selective for brood retrieval.

## Acknowledgements

The authors would like to thanks Baptiste Piqueret and Swetashree Kolay for their commentaries on the design of the experimental protocols and the data analysis. We also, would like to thank Sarah Quemini and Laurène Ozeel for their help in the realisation of some behavioural experiments and their analysis.

## Funding

Arthur de Fouchier, Patrizia d’Ettorre and Abderrahman Khila contribution to this work has been supported by the grant ANR-17-CE13-0008 SocioDev.

## Data availability

Data used for the analysis performed have been deposited on FigShare: 10.6084/m9.figshare.14303078 and 10.6084/m9.figshare.14304167.

## References

1. Khila A, Abouheif E. 2008 Reproductive constraint is a developmental mechanism that maintains social harmony in advanced ant societies. *Proceedings of the National Academy of Sciences* **105**, 17884–17889. (doi:10.1073/pnas.0807351105)
2. Khila A, Abouheif E. 2010 Evaluating the role of reproductive constraints in ant social evolution. *Philosophical Transactions of the Royal Society B: Biological Sciences* **365**, 617–630. (doi:10.1098/rstb.2009.0257)
3. Lenoir A. 1981 Brood retrieving in the ant, *Lasius niger* L. *Sociobiology* **6**, 153–178.
4. Meudec M. 1978 Response to and transport of brood by workers of *Tapinoma erraticum* (Formicidae; Dolichoderinae) during nest disturbance. *Behavioural Processes* **3**, 199–209. (doi:10.1016/0376-6357(78)90013-X)
5. Schultner E, Pulliainen U. 2020 Brood recognition and discrimination in ants. *Insect. Soc.* **67**, 11–34. (doi:10.1007/s00040-019-00747-3)
6. Fénéron R, Jaisson P. 1995 Ontogeny of nestmate brood recognition in a primitive ant, *Ectatomma tuberculatum* Olivier (Ponerinae). *Animal Behaviour* **50**, 9–14. (doi:10.1006/anbe.1995.0215)
7. Fouks B, d’Ettorre P, Nehring V. 2011 Brood adoption in the leaf-cutting ant *Acromyrmex echinator*: Adaptation or recognition noise? *Insectes Sociaux* **58**, 479–485. (doi:10.1007/s00040-011-0167-9)
8. Madsen, Offenberg. 2017 Effect of pleometrosis and brood transplantation on colony growth of the black garden ant, *Lasius niger*. *Asian Myrmecology* **9**, 1–11. (doi:10.20362/AM.009003)
9. Paul B, Annagiri S. 2019 Caught red-handed: behaviour of brood thieves in an Indian ant. *Journal of Experimental Biology* **222**. (doi:10.1242/jeb.193755)
10. Lenoir A, d’Ettorre P, Errard C, Hefetz A. 2001 Chemical Ecology and Social Parasitism in Ants. *Annual Review of Entomology* **46**, 573–599. (doi:10.1146/annurev.ento.46.1.573)
11. Buschinger A. 2009 Social parasitism among ants: A review (Hymenoptera: Formicidae). *Myrmecological News* **12**, 219–235.
12. Sato S, Iwasa Y. 2019 Chemical mimicry or crypsis—the evolutionary game played by parasitic ants invading other colonies. *Theoretical Ecology*, 1–9. (doi:10.1007/s12080-018-0406-z)
13. Grüter C, Jongepier E, Foitzik S. 2018 Insect societies fight back: the evolution of defensive traits against social parasites. *Philosophical Transactions of the Royal Society B: Biological Sciences* **373**, 20170200. (doi:10.1098/rstb.2017.0200)
14. Sturgis SJ, Gordon DM. 2012 Nestmate recognition in ants (Hymenoptera: Formicidae): A review. *Myrmecological News* **16**, 101–110.
15. van Zweden JS, d’Ettorre P. 2010 Nestmate recognition in social insects and the role of hydrocarbons. In *Insect Hydrocarbons Biology, Biochemistry, and Chemical Ecology* (eds GJ Blomquist, A-G Bagneres), pp. 222–243. Cambridge: Cambridge University Press. (doi:10.1017/CBO9780511711909.012)

- 369 16. van Zweden JS, Brask JB, Christensen JH, Boomsma JJ, Linksvayer TA, d'Ettorre P. 2010 Blending  
370 of heritable recognition cues among ant nestmates creates distinct colony gestalt odours but  
371 prevents within-colony nepotism. *Journal of Evolutionary Biology* (doi:10.1111/j.1420-  
372 9101.2010.02020.x)
- 373 17. Liang D, Silverman J. 2000 “You are what you eat”: Diet modifies cuticular hydrocarbons and  
374 nestmate recognition in the Argentine ant, *Linepithema humile*. *Naturwissenschaften* **87**, 412–  
375 416. (doi:10.1007/s001140050752)
- 376 18. Lenoir A, Depickère S, Devers S, Christidès J-P, Detrain C. 2009 Hydrocarbons in the Ant *Lasius*  
377 *niger*: From the Cuticle to the Nest and Home Range Marking. *Journal of Chemical Ecology* **35**,  
378 913–921. (doi:10.1007/s10886-009-9669-6)
- 379 19. d'Ettorre P, Heinze J, Ratnieks FLW. 2004 Worker policing by egg eating in the ponerine ant  
380 *Pachycondyla inversa*. *Proceedings of the Royal Society of London. Series B: Biological Sciences*  
381 **271**, 1427–1434. (doi:10.1098/rspb.2004.2742)
- 382 20. Endler A, Liebig J, Schmitt T, Parker JE, Jones GR, Schreier P, Hölldobler B. 2004 Surface  
383 hydrocarbons of queen eggs regulate worker reproduction in a social insect. *Proceedings of the*  
384 *National Academy of Sciences of the United States of America* **101**, 2945–2950.  
385 (doi:10.1073/pnas.0308447101)
- 386 21. Tannure-Nascimento IC, Nascimento FS, Dantas JO, Zucchi R. 2009 Decision rules for egg  
387 recognition are related to functional roles and chemical cues in the queenless ant *Dinoponera*  
388 *quadricaps*. *Naturwissenschaften* **96**, 857–861. (doi:10.1007/s00114-009-0535-8)
- 389 22. van Zweden JS, Heinze J, Boomsma JJ, d'Ettorre P. 2009 Ant queen egg-marking signals:  
390 Matching deceptive laboratory simplicity with natural complexity. *PLoS ONE* **4**, e4718.  
391 (doi:10.1371/journal.pone.0004718)
- 392 23. Holman L *et al.* 2010 Identification of an ant queen pheromone regulating worker sterility.  
393 *Proceedings of the Royal Society B: Biological Sciences* **277**, 3793–3800.  
394 (doi:10.1098/rspb.2010.0984)
- 395 24. Ruel C, Lenoir A, Cerdá X, Boulay R. 2013 Surface lipids of queen-laid eggs do not regulate queen  
396 production in a fission-performing ant. *Naturwissenschaften* **100**, 91–100. (doi:10.1007/s00114-  
397 012-0997-y)
- 398 25. Helanterä H, d'Ettorre P. 2015 A comparative study of egg recognition signature mixtures in  
399 *Formica* ants. *Evolution* **69**, 520–529. (doi:10.1111/evo.12590)
- 400 26. Schal C, Sevala VL, Young HP, Bachmann JAS. 1998 Sites of Synthesis and Transport Pathways of  
401 Insect Hydrocarbons: Cuticle and Ovary as Target Tissues. *Am Zool* **38**, 382–393.  
402 (doi:10.1093/icb/38.2.382)
- 403 27. Schultner E, Oettler J, Helanterä H. 2017 The Role of Brood in Eusocial Hymenoptera. *The*  
404 *Quarterly Review of Biology* **92**, 39–78. (doi:10.1086/690840)
- 405 28. d'Ettorre P, Tofilski A, Heinze J, Ratnieks FLW. 2006 Non-transferable signals on ant queen eggs.  
406 *Naturwissenschaften* **93**, 136–140. (doi:10.1007/s00114-005-0075-9)

- 407 29. Juárez MP, Fernández GC. 2007 Cuticular hydrocarbons of triatomines. *Comparative*  
408 *Biochemistry and Physiology Part A: Molecular & Integrative Physiology* **147**, 711–730.  
409 (doi:10.1016/j.cbpa.2006.08.031)
- 410 30. Howard RW, Blomquist GJ. 2004 Ecological, Behavioral, and Biochemical Aspects of Insect  
411 Hydrocarbons. *Annual Review of Entomology* **50**, 371–393.  
412 (doi:10.1146/annurev.ento.50.071803.130359)
- 413 31. Villalta I, Amor F, Cerdá X, Boulay R. 2016 Social coercion of larval development in an ant species.  
414 *The Science of Nature* **103**, 18. (doi:10.1007/s00114-016-1341-8)
- 415 32. Moreau CS, Bell CD, Vila R, Archibald SB, Pierce NE. 2006 Phylogeny of the Ants: Diversification in  
416 the Age of Angiosperms. *Science* **312**, 101–104. (doi:10.1126/science.1124891)
- 417 33. Friard O, Gamba M. 2016 BORIS: a free, versatile open-source event-logging software for  
418 video/audio coding and live observations. *Methods in Ecology and Evolution* **7**, 1325–1330.  
419 (doi:10.1111/2041-210X.12584)
- 420 34. RStudio Team. 2015 *RStudio: Integrated Development Environment for R*. Boston, MA: RStudio,  
421 Inc. See <http://www.rstudio.com/>.
- 422 35. R Core Team. 2019 *R: A Language and Environment for Statistical Computing*. Vienna, Austria: R  
423 Foundation for Statistical Computing. See <https://www.R-project.org/>.
- 424 36. van Zweden JS, Pontieri L, Pedersen JS. 2014 A statistical approach to identify candidate cues for  
425 nestmate recognition. *Front. Ecol. Evol.* **2**. (doi:10.3389/fevo.2014.00073)
- 426 37. Ojala M, Garriga GC. 2010 Permutation tests for studying classifier performance. *Journal of*  
427 *Machine Learning Research* **11**.
- 428 38. Koul A, Becchio C, Cavallo A. 2018 PredPsych: A toolbox for predictive machine learning-based  
429 approach in experimental psychology research. *Behav Res* **50**, 1657–1672. (doi:10.3758/s13428-  
430 017-0987-2)
- 431 39. Provost E, Riviere G, Roux M, Bagnères AG, Clement JL. 1994 Cuticular hydrocarbons whereby  
432 Messor barbarus ant workers putatively discriminate between monogynous and polygynous  
433 colonies. Are workers labeled by queens? *Journal of Chemical Ecology* **20**, 2985–3003.  
434 (doi:10.1007/BF02098404)
- 435 40. Sharma KRR *et al.* 2015 Cuticular Hydrocarbon Pheromones for Social Behavior and Their Coding  
436 in the Ant Antenna. *Cell Reports* **12**, 1261–1271. (doi:10.1016/j.celrep.2015.07.031)
- 437 41. Chernenko A, Helanterä H, Sundström L. 2011 Egg Recognition and Social Parasitism in Formica  
438 Ants. *Ethology* **117**, 1081–1092. (doi:10.1111/j.1439-0310.2011.01972.x)
- 439 42. Helanterä H, Sundström L. 2007 Worker policing and nest mate recognition in the ant Formica  
440 fusca. *Behavioral Ecology and Sociobiology* **61**, 1143–1149. (doi:10.1007/s00265-006-0327-5)
- 441 43. Pulliainen U, Helanterä H, Sundström L, Schultner E. 2019 The possible role of ant larvae in the  
442 defence against social parasites. *Proceedings. Biological sciences* **286**, 20182867.  
443 (doi:10.1098/rspb.2018.2867)

- 444 44. Nascimento FS, Tannure-Nascimento IC, Dantas JO, Turatti IC, Lopes NP. 2013 Task-Related  
445 Variation of Cuticular Hydrocarbon Profiles Affect Nestmate Recognition in the Giant ant  
446 *Dinoponera quadriceps*. *J Insect Behav* **26**, 212–222. (doi:10.1007/s10905-012-9353-5)
- 447 45. Rossi N, Baracchi D, Giurfa M, d’Ettorre P. 2018 Pheromone-Induced Accuracy of Nestmate  
448 Recognition in Carpenter Ants: Simultaneous Decrease in Type I and Type II Errors. *The American*  
449 *Naturalist* **193**, 267–278. (doi:10.1086/701123)

## Figure Legends

### Figure 1: Chemical profiles of egg and L1 larvae

**A)** Bar plots of the number of hydrocarbon compounds identified in egg and L1 larvae surface extracts grouped by families: alkane (light grey), alkene (medium grey) and methyl-branched alkane (m-alkane, dark grey). **B)** Boxplots of the total area of the compounds identified in hydrocarbon compounds identified in egg and L1 larvae surface extracts grouped by families (same as in A). **C)** Boxplots of the normalised area of the compounds identified in hydrocarbon compounds identified in egg and L1 larvae surface extracts. The family of the compounds are displayed as in A.

### Figure 2: Colony specific hydrocarbon signature of ant early brood

**A)** Precisions of the linear discriminant analysis for each colony in each sample types performed from the principal components, displayed in Supplementary Figure S3, that had an F-score superior or equal to 0.01. The black narrower lines represent the mean precision for each sample type. The red wider line represents a random precision. Significance of the difference of mean precisions compared to a random precision were computed with a permutation test. NS:  $p \geq 0.05$ ; \* :  $p \leq 0.05$ ; \*\* :  $p \leq 0.01$ ; \*\*\* :  $p \leq 0.001$ . **B)** Ratios of the Euclidian distances between nestmate and non-nestmate measured with the global-centroid method from the principal components, displayed in A, that had an F-score superior or equal to 0.01. Black dots represent outlier values that are 1.5 times outside the interquartile range. Letters represent groups of statistical similarity in each sample type (LMM ; Type II Anova ;  $p \leq 0.05$ ).

### Figure 3: Worker behaviour towards early brood

**A)** Boxplots of the number of nestmate (NM), non-nestmate (NNM) and hetero-specific (Mbar, Lnig or Ffus) eggs or larvae brought into the refuge by workers in all the behavioural trials. **B)** Boxplots of the total time spent by workers antennating brood during the trials where they displayed those behaviours. Diamonds represent the means. Letters show groups of statistical similarity in each species (LMM ; Type II Anova ;  $p \leq 0.05$ ). Black dots represent outlier values that are 1.5 times outside the interquartile range.

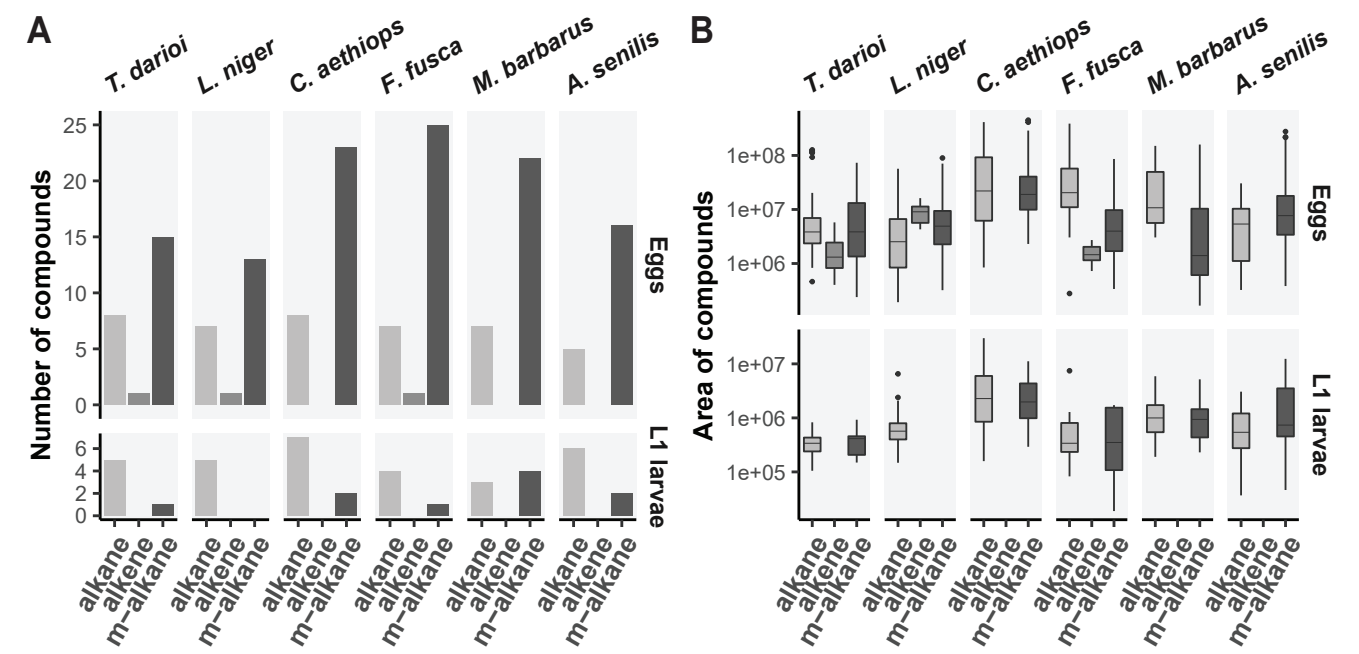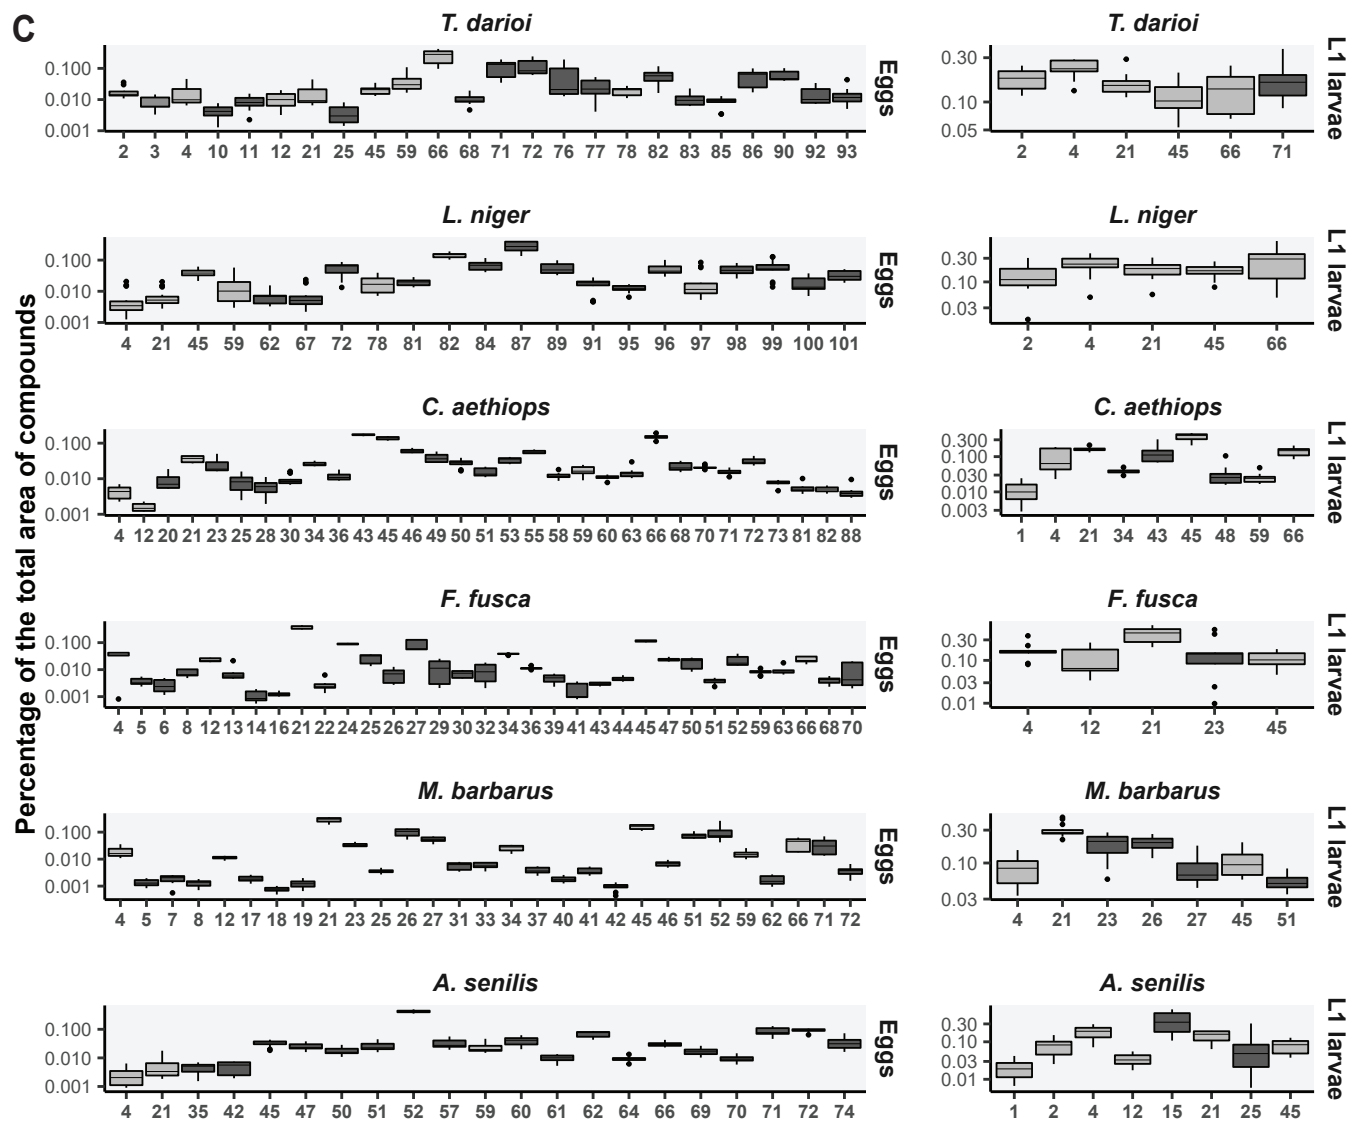



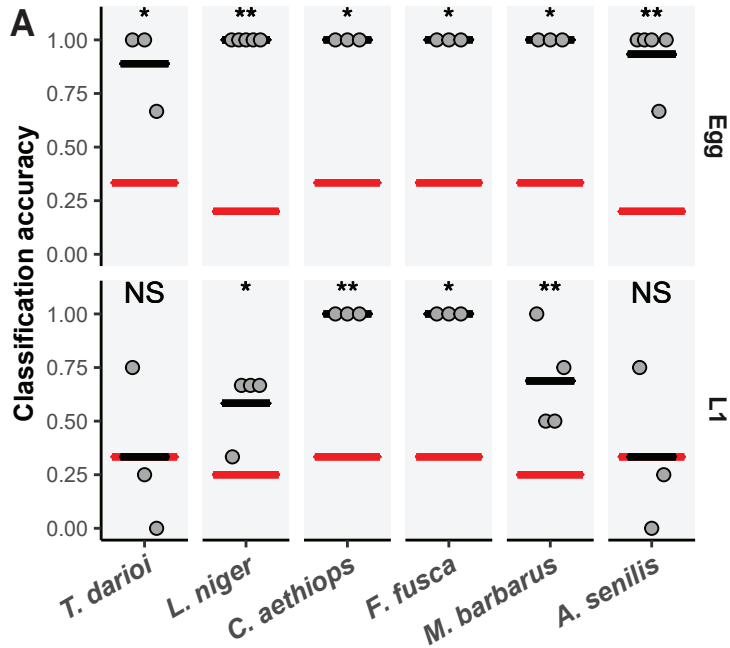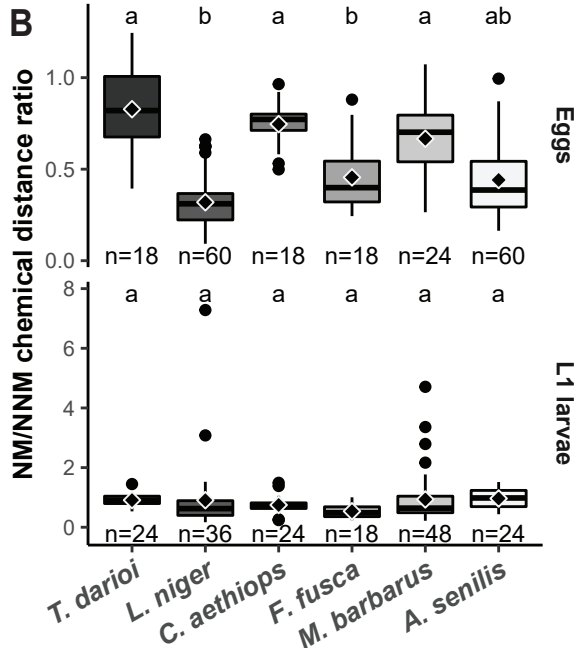

Source: https://www.biorxiv.org/content/biorxiv/early/2021/04/06/2021.03.17.435807.full.pdf
